# Supplementary material
Source: PubMed Central journal article supplement (PMC3471652)

Minutissamides E - L, Antiproliferative Cyclic  
Lipodecapeptides from the Cultured Freshwater  
Cyanobacterium cf. *Anabaena* sp.

*Hahk-Soo Kang, Megan Sturdy, Aleksej Kronic, Hyunjung Kim, Qi Shen, Steven M. Swanson and Jimmy Orjala\**

Department of Medicinal Chemistry and Pharmacognosy, University of Illinois at Chicago, 833 S.  
Wood St., Chicago, Illinois, 60612

**Supplementary Data**

## Table of Contents

- S1. Morphological comparison between *Anabaena minutissima* UTEX 1613 and cf. *Anabaena* sp. UIC 10035
- S2. Complete phylogenetic tree for taxonomic identification of UIC 10035
- S3. Complete NMR data for minutissamide E (**1**) in DMSO-*d*<sub>6</sub>
- S4. Advanced Marfey's analysis of **1** for the determination of amino acid configurations
- S5. Synthesis of OMeThr standards and Marfey's analysis of **1** for the absolute configuration of OMeThr
- S6. <sup>1</sup>H NMR spectrum (600 MHz, DMSO-*d*<sub>6</sub>) of **1**
- S7. DEPTQ spectrum (226 MHz, DMSO-*d*<sub>6</sub>) of **1**
- S8. COSY spectrum (600 MHz, DMSO-*d*<sub>6</sub>) of **1**
- S9. TOCSY spectrum (600 MHz, DMSO-*d*<sub>6</sub>) of **1**
- S10. HSQC spectrum (600 MHz, DMSO-*d*<sub>6</sub>) of **1**
- S11. HMBC spectrum (600 MHz, DMSO-*d*<sub>6</sub>) of **1**
- S12. T-ROESY spectrum (600 MHz, DMSO-*d*<sub>6</sub>) of **1**
- S13. <sup>1</sup>H NMR spectrum (600 MHz, DMSO-*d*<sub>6</sub>) of **2**
- S14. DEPTQ spectrum (226 MHz, DMSO-*d*<sub>6</sub>) of **2**
- S15. COSY spectrum (600 MHz, DMSO-*d*<sub>6</sub>) of **2**
- S16. TOCSY spectrum (600 MHz, DMSO-*d*<sub>6</sub>) of **2**
- S17. HSQC spectrum (600 MHz, DMSO-*d*<sub>6</sub>) of **2**
- S18. HMBC spectrum (600 MHz, DMSO-*d*<sub>6</sub>) of **2**
- S19. <sup>1</sup>H NMR spectrum (600 MHz, DMSO-*d*<sub>6</sub>) of **3**
- S20. COSY spectrum (600 MHz, DMSO-*d*<sub>6</sub>) of **3**
- S21. TOCSY spectrum (600 MHz, DMSO-*d*<sub>6</sub>) of **3**
- S22. HSQC spectrum (600 MHz, DMSO-*d*<sub>6</sub>) of **3**
- S23. <sup>1</sup>H NMR spectrum (600 MHz, DMSO-*d*<sub>6</sub>) of **4**
- S24. COSY spectrum (600 MHz, DMSO-*d*<sub>6</sub>) of **4**
- S25. TOCSY spectrum (600 MHz, DMSO-*d*<sub>6</sub>) of **4**
- S26. HSQC spectrum (600 MHz, DMSO-*d*<sub>6</sub>) of **4**
- S27. HMBC spectrum (600 MHz, DMSO-*d*<sub>6</sub>) of **4**
- S28. <sup>1</sup>H NMR spectrum (600 MHz, DMSO-*d*<sub>6</sub>) of **5**
- S29. DEPTQ spectrum (226 MHz, DMSO-*d*<sub>6</sub>) of **5**
- S30. COSY spectrum (600 MHz, DMSO-*d*<sub>6</sub>) of **5**
- S31. TOCSY spectrum (600 MHz, DMSO-*d*<sub>6</sub>) of **5**
- S32. HSQC spectrum (600 MHz, DMSO-*d*<sub>6</sub>) of **5**
- S33. HMBC spectrum (600 MHz, DMSO-*d*<sub>6</sub>) of **5**

- S34. Selective HMBC spectrum (900 MHz, DMSO-*d*<sub>6</sub>) of **5**
- S35. <sup>1</sup>H NMR spectrum (600 MHz, DMSO-*d*<sub>6</sub>) of **6**
- S36. COSY spectrum (600 MHz, DMSO-*d*<sub>6</sub>) of **6**
- S37. TOCSY spectrum (600 MHz, DMSO-*d*<sub>6</sub>) of **6**
- S38. HSQC spectrum (600 MHz, DMSO-*d*<sub>6</sub>) of **6**
- S39. HMBC spectrum (600 MHz, DMSO-*d*<sub>6</sub>) of **6**
- S40. <sup>1</sup>H NMR spectrum (600 MHz, DMSO-*d*<sub>6</sub>) of the mixture of **7** and **8**
- S41. COSY spectrum (600 MHz, DMSO-*d*<sub>6</sub>) of the mixture of **7** and **8**
- S42. TOCSY spectrum (600 MHz, DMSO-*d*<sub>6</sub>) of the mixture of **7** and **8**
- S43. HSQC spectrum (600 MHz, DMSO-*d*<sub>6</sub>) of the mixture of **7** and **8**
- S44. HMBC spectrum (600 MHz, DMSO-*d*<sub>6</sub>) of the mixture of **7** and **8**

S1. Morphological comparison between *Anabaena minutissima* UTEX 1613 and cf. *Anabaena* sp. UIC 10035

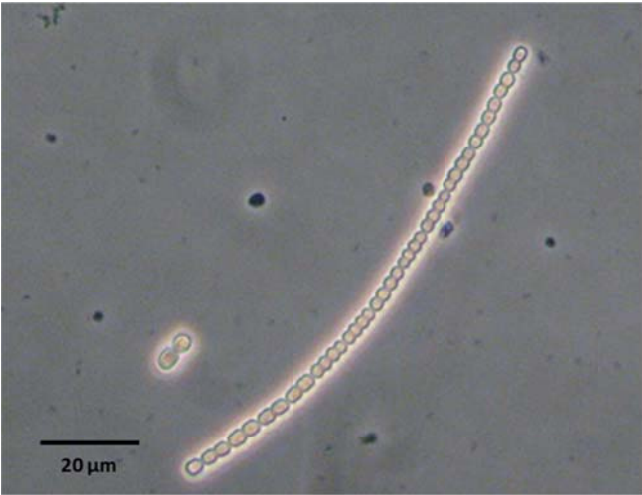

**UTEX 1613**

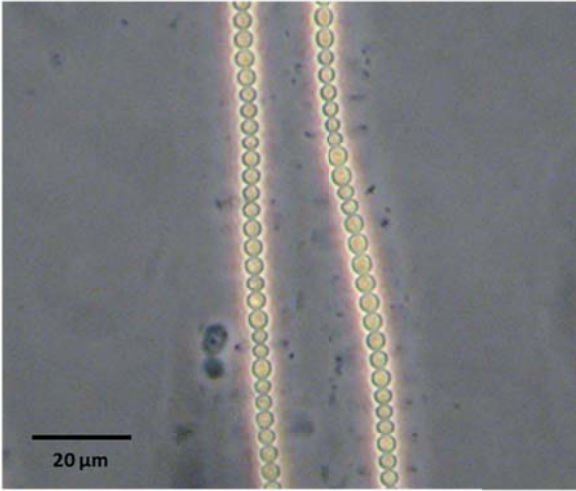

**UIC 10035**

## S2. Complete phylogenetic tree for taxonomic identification of UIC 10035

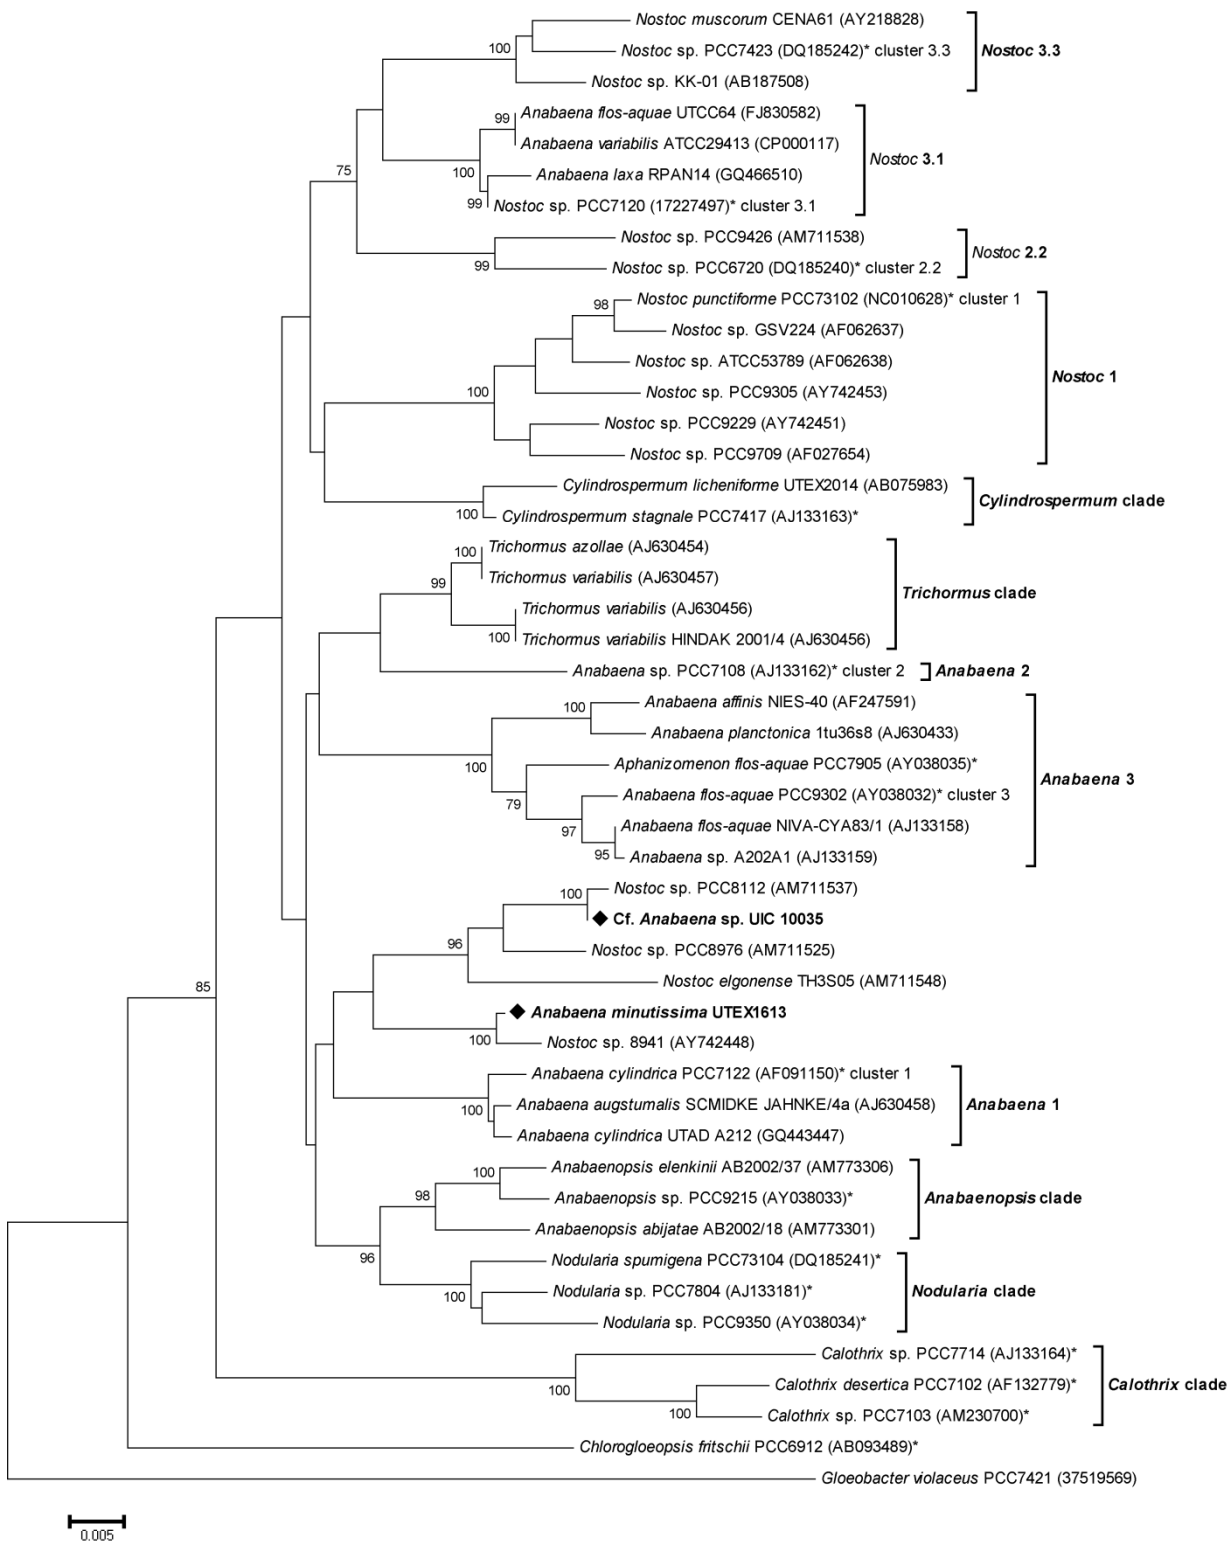

Evolutionary distances were determined using the minimum evolution method with 1,000 replicate bootstrap re-sampling to construct the phylogenetic tree. Strains denoted with an asterisk (\*) are “Bergey’s” reference strains. Strains were obtained from NCBI with the accession number given in parentheses. Only bootstrap values greater than or equal to 75% are displayed.

S3. Complete NMR data for minutissamide E (**1**) in DMSO-*d*<sub>6</sub>

|        |                 | Minutissamide E ( <b>1</b> ) |              |                            |                   |                                    |                                                                                                               |                                                     |
|--------|-----------------|------------------------------|--------------|----------------------------|-------------------|------------------------------------|---------------------------------------------------------------------------------------------------------------|-----------------------------------------------------|
|        |                 | $\delta_C^a$                 | $\delta_H^b$ | mult.<br>( <i>J</i> in Hz) | COSY <sup>b</sup> | HMBC <sup>b</sup>                  | ROESY <sup>b</sup>                                                                                            |                                                     |
| Ahmoo  | 1               | 169.6                        |              |                            |                   |                                    |                                                                                                               |                                                     |
|        | 2               | 69.6                         | 4.17         | d (4.8)                    | H-3               | 1                                  | NH                                                                                                            |                                                     |
|        | 3               | 56.0                         | 3.92         | td (10.8, 4.8)             | H-2, H-4, NH      | 1, 2, 4, 4-Me                      | H-2, H <sub>2</sub> -5, 4-Me                                                                                  |                                                     |
|        | 4               | 32.2                         | 1.68         | m                          | H-3, H-5, 4-Me    |                                    | H-2                                                                                                           |                                                     |
|        | 5               | 33.4                         | 1.17         | m                          | H-4               |                                    | H-3, 4-Me                                                                                                     |                                                     |
|        |                 |                              | 1.62         | m                          |                   |                                    |                                                                                                               |                                                     |
|        |                 |                              | 1.17         | m                          |                   |                                    |                                                                                                               |                                                     |
|        |                 |                              | 1.25         | m                          |                   |                                    |                                                                                                               |                                                     |
|        |                 |                              | 1.25         | m                          |                   |                                    |                                                                                                               |                                                     |
|        |                 |                              | 1.25         | m                          | overlapped        |                                    | overlapped                                                                                                    |                                                     |
|        |                 |                              | 1.25         | m                          |                   |                                    |                                                                                                               |                                                     |
|        |                 |                              | 1.25         | m                          |                   |                                    |                                                                                                               |                                                     |
|        |                 |                              | 1.25         | m                          |                   |                                    |                                                                                                               |                                                     |
|        |                 |                              | 1.44         | m                          | H-14, H-12        | 12, 14, 15                         |                                                                                                               |                                                     |
|        |                 |                              | 2.37         | t (7.2)                    | H-13              | 12, 13                             |                                                                                                               |                                                     |
|        |                 |                              | 210.6        |                            |                   |                                    |                                                                                                               |                                                     |
|        |                 |                              | 43.8         | 2.36                       | t (7.2)           | H-17                               | 15, 17, 18                                                                                                    |                                                     |
|        |                 |                              | 16.7         | 1.47                       | s (7.2)           | H-16, H-18                         | 15, 16, 18                                                                                                    |                                                     |
|        |                 | 13.6                         | 0.83         | t (7.2)                    | H-17              | 16, 17                             |                                                                                                               |                                                     |
|        | 3-NH            |                              | 6.77         | d (10.8)                   |                   | 3, 1 <sub>Pro</sub>                | H-2, H-4, 4-Me, H-2 <sub>NMeAsn</sub>                                                                         |                                                     |
|        | 4-Me            |                              | 0.57         | d (6.6)                    |                   | 3, 5                               | H-3, H-5                                                                                                      |                                                     |
| Pro    | 1               | 171.2                        |              |                            |                   |                                    |                                                                                                               |                                                     |
|        | 2               | 59.9                         | 4.25         | dd (8.4, 2.4)              | H-3               | 1, 3, 4                            | H-3, H-4, NH <sub>Ahmoo</sub>                                                                                 |                                                     |
|        | 3               | 30.1                         | 1.94         | m                          | H-2, H-4          |                                    |                                                                                                               |                                                     |
|        |                 |                              | 1.99         | m                          |                   |                                    |                                                                                                               |                                                     |
|        |                 |                              | 1.71         | m                          |                   |                                    |                                                                                                               |                                                     |
|        |                 | 23.4                         | 1.84         | m                          | H-3, H-5          |                                    |                                                                                                               |                                                     |
|        |                 |                              | 3.11         | m                          |                   |                                    |                                                                                                               |                                                     |
|        |                 |                              | 4.21         | m                          | H-4               |                                    | H-2, H-3, H-4, H-2 <sub>NMeAsn</sub>                                                                          |                                                     |
| NMeAsn | 1               | 167.4                        |              |                            |                   |                                    |                                                                                                               |                                                     |
|        | 2               | 49.7                         | 5.52         | dd (11.4, 3.6)             | H-3               | 1, 3, 4, N-Me, 1 <sub>OMeThr</sub> | H-3, NH <sub>Thr2</sub> , H-5 <sub>Pro</sub> , H-2 <sub>Thr2</sub> , NH <sub>Thr2</sub> , NH <sub>Ahmoo</sub> |                                                     |
|        | 3               | 33.7                         | 1.97         | overlapped                 | H-2               | 1, 2, 4                            | H-2                                                                                                           |                                                     |
|        |                 |                              | 3.00         | dd (15.6, 12.0)            |                   |                                    |                                                                                                               |                                                     |
|        |                 |                              | 171.5        |                            |                   |                                    |                                                                                                               |                                                     |
|        | N-Me            |                              | 30.5         | 2.93                       | s                 | 2, 1 <sub>OMeThr</sub>             | H-2 <sub>OMeThr</sub> , H-3 <sub>OMeThr</sub>                                                                 |                                                     |
|        |                 |                              |              | 5.99                       | s                 |                                    |                                                                                                               |                                                     |
|        | NH <sub>2</sub> |                              |              | 7.49                       | s                 | 3, 4                               | H-3, H-3 <sub>Dhb</sub>                                                                                       |                                                     |
| OMeThr | 1               | 169.6                        |              |                            |                   |                                    |                                                                                                               |                                                     |
|        | 2               | 52.6                         | 4.79         | dd (9.0, 1.8)              | NH, H-3           | 3, 4, 1 <sub>Ala</sub>             | H-3, H-4, NH, NMe                                                                                             |                                                     |
|        | 3               | 75.1                         | 3.71         | qd (6.0, 1.8)              | H-2, H-4          | OMe                                | H-2, H-4, NMe, H <sub>2</sub> -5 <sub>Pro</sub>                                                               |                                                     |
|        | 4               | 14.7                         | 0.95         | d (6.0)                    | H-3               | 2, 3                               | H-2, H-3, OMe                                                                                                 |                                                     |
|        | O-Me            |                              | 55.6         | 3.13                       | s                 |                                    | 3                                                                                                             | H-3                                                 |
|        | NH              |                              |              | 6.74                       | d (9.0)           | H-2                                | 1 <sub>Ala</sub>                                                                                              | NH <sub>Ala</sub>                                   |
| Ala    | 1               | 171.9                        |              |                            |                   |                                    |                                                                                                               |                                                     |
|        | 2               | 49.1                         | 4.19         | p (7.8)                    | H-3, NH           | 3                                  | NH                                                                                                            |                                                     |
|        | 3               | 16.3                         | 1.29         | d (7.8)                    | H-2               | 1, 2                               | H-2                                                                                                           |                                                     |
|        | NH              |                              |              | 7.58                       | d (7.8)           | H-2                                | 2, 3, 1 <sub>Gln</sub>                                                                                        | H-2, H-3, NH <sub>OMeThr</sub> , H-2 <sub>Gln</sub> |
| Gln    | 1               | 171.1                        |              |                            |                   |                                    |                                                                                                               |                                                     |
|        | 2               | 52.9                         | 4.08         | m                          | H-3, NH           | 3                                  | H-3, H-4, NH                                                                                                  |                                                     |
|        |                 |                              | 1.78         | m                          |                   |                                    |                                                                                                               |                                                     |
|        |                 |                              | 2.03         | m                          | H-2, H-4          |                                    | H-2                                                                                                           |                                                     |
|        |                 |                              | 2.15         | m                          | H-3               | 2, 3, 5                            | H-2, H-4 <sub>Thr</sub>                                                                                       |                                                     |
|        |                 |                              | 173.9        |                            |                   |                                    |                                                                                                               |                                                     |
|        | NH              |                              | 7.25         | d (9.0)                    | H-2               | 2, 3, 1 <sub>Thr1</sub>            | H-2, H-3, H-2 <sub>Thr1</sub> , H-3 <sub>Thr2</sub>                                                           |                                                     |
|        | NH <sub>2</sub> |                              | 6.80         | s                          |                   | 4, 5                               | H-4                                                                                                           |                                                     |

| 7.27 s |    |       |                     |                |                           |  |                                                                          |
|--------|----|-------|---------------------|----------------|---------------------------|--|--------------------------------------------------------------------------|
| Thr1   | 1  | 170.4 |                     |                |                           |  |                                                                          |
|        | 2  | 61.3  | 3.90 m              | H-3, NH        | 3                         |  | H-3, H-4                                                                 |
|        | 3  | 65.2  | 4.17 overlapped     | H-2, H-4       |                           |  |                                                                          |
|        | 4  | 20.6  | 1.25 overlapped     | H-3            | 2, 3                      |  | H-2                                                                      |
|        | NH |       | 8.84 brs            | H-2            |                           |  | H-2, H-3, H-2 <sub>Thr2</sub> , H-3 <sub>Thr2</sub> , NH <sub>Gln</sub>  |
| Thr2   | 1  | 174.2 |                     |                |                           |  |                                                                          |
|        | 2  | 56.6  | 5.02 dd (10.2, 2.4) | H-3, NH        | 1, 3, 1 <sub>Dhb</sub>    |  | H-3, H-4, NH, NH <sub>Thr1</sub>                                         |
|        | 3  | 70.3  | 4.57 brm            | H-2, H-4       |                           |  | H-2, H-4, H-2 <sub>OMeThr</sub> , NH <sub>Gln</sub> , NH <sub>Thr1</sub> |
|        | 4  | 19.0  | 1.25 overlapped     | H-3            | 2, 3                      |  | H-3, H-5 <sub>Pro</sub>                                                  |
|        | NH |       | 8.37 d (10.2)       | H-2            | 1 <sub>Dhb</sub>          |  | H-2, H-2 <sub>NMeAsn</sub> , NH <sub>OMeThr</sub>                        |
| Dhb    | 1  | 163.9 |                     |                |                           |  |                                                                          |
|        | 2  | 132.4 |                     |                |                           |  |                                                                          |
|        | 3  | 117.3 | 5.38 q (7.2)        | H-4            | 1, 2, 4                   |  | H-4, NH, NH <sub>2NMeAsn</sub>                                           |
|        | 4  | 13.2  | 1.75 d (7.2)        | H-3            | 2, 3                      |  | H-3, H-4 <sub>Thr2</sub>                                                 |
|        | NH |       | 9.08 s              |                | 1, 2, 3, 1 <sub>Val</sub> |  | H-3, H-2 <sub>Val</sub>                                                  |
| Val    | 1  | 168.8 |                     |                |                           |  |                                                                          |
|        | 2  | 55.5  | 4.31 dd (9.0, 6.0)  | H-3, NH        | 3, 4, 4'                  |  | H-3, H-4, H-4', NH, NH <sub>Dhb</sub>                                    |
|        | 3  | 32.7  | 1.81 m              | H-2, H-4, H-4' | 1, 2, 4, 4'               |  |                                                                          |
|        | 4  | 18.4  | 0.83 d (6.0)        | H-3            | 2, 3, 4'                  |  | H-2, H-3                                                                 |
|        | 4' | 19.0  | 0.89 d (6.0)        | H-3            | 2, 3, 4                   |  | H-2, H-3                                                                 |
|        | NH |       | 6.85 d (9.0)        |                |                           |  | H-2, H-3, H-4, H-2 <sub>Ahmoo</sub>                                      |

<sup>a</sup>Carbon chemical shifts were assigned from the DEPT-Q spectrum (226 MHz), <sup>b</sup>Measured at 600 MHz

S4. Advanced Marfey's analysis of **1** for the determination of amino acid configurations

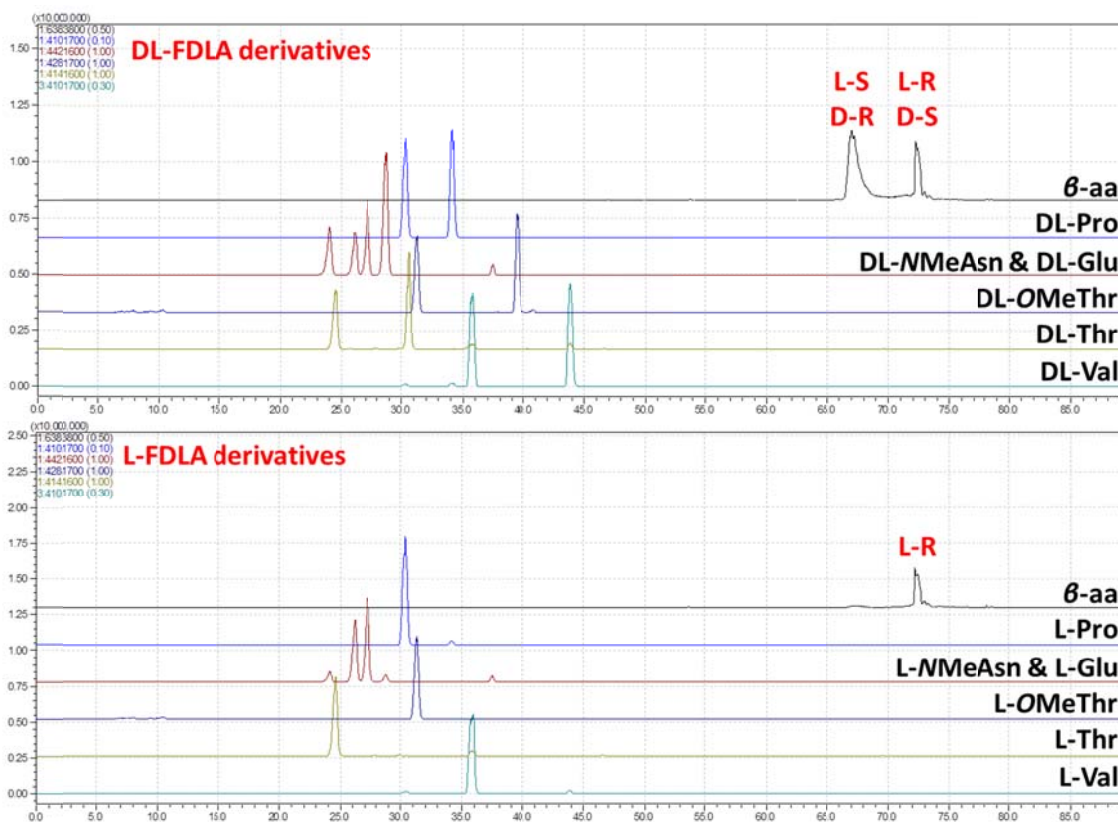

| Amino acid | HPLC retention times of DL-FDLA derivative of acid hydrolysate of <b>1</b> |              | HPLC retention times of L-FDLA derivative of acid hydrolysate of <b>1</b> | Assignment |
|------------|----------------------------------------------------------------------------|--------------|---------------------------------------------------------------------------|------------|
|            | L                                                                          | D            |                                                                           |            |
| Ahmoo      | 67.0 min (S)                                                               | 72.4 min (R) | 72.4 min                                                                  | R          |
| Pro        | 30.4 min                                                                   | 34.1 min     | 30.5 min                                                                  | L          |
| NMeAsn     | 26.3 min                                                                   | 24.0 min     | 26.3 min                                                                  | L          |
| Ala        | 30.9 min                                                                   | 35.4 min     | 35.6 min                                                                  | D          |
| Gln        | 27.2 min                                                                   | 28.7 min     | 27.4 min                                                                  | L          |
| Thr        | 24.5 min                                                                   | 30.6 min     | 24.7 min                                                                  | L          |
| Val        | 35.8 min                                                                   | 43.8 min     | 35.9 min                                                                  | L          |

- L-FDLA derivative of Thr was further compared with L-FDLA derivatives of four Thr amino acid standards L-Thr, L-*allo*-Thr, D-Thr and D-*allo*-Thr, and corresponded with the retention time of L-Thr.



S5. Synthesis of OMeThr standards and Marfey's analysis of **1** for the absolute configuration of OMeThr

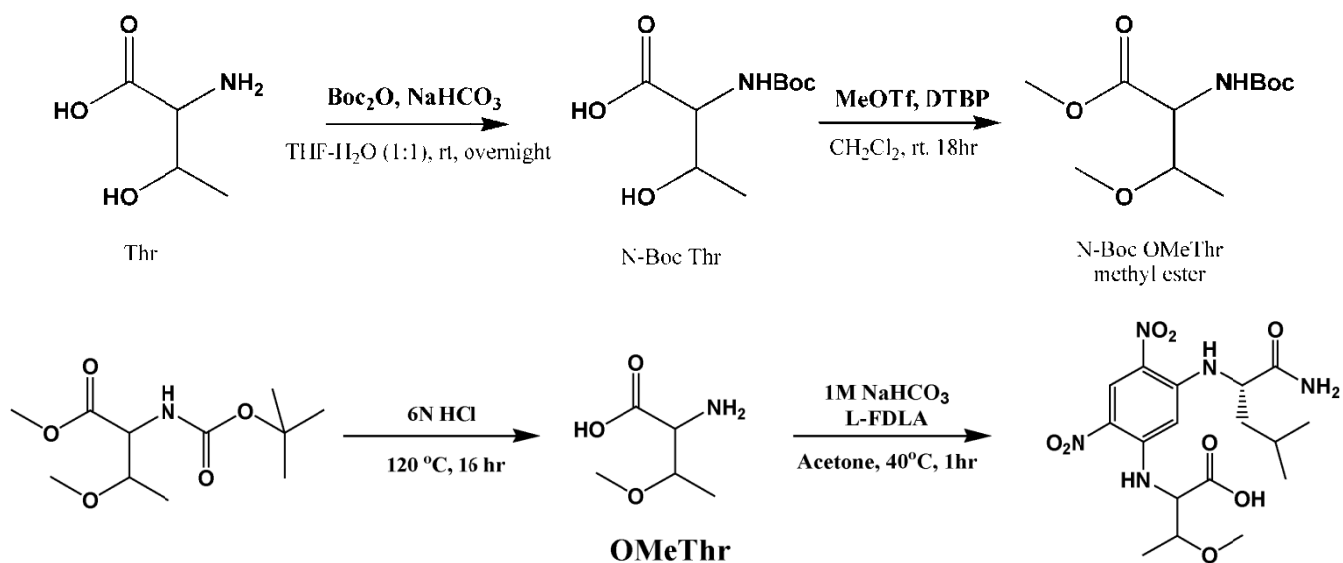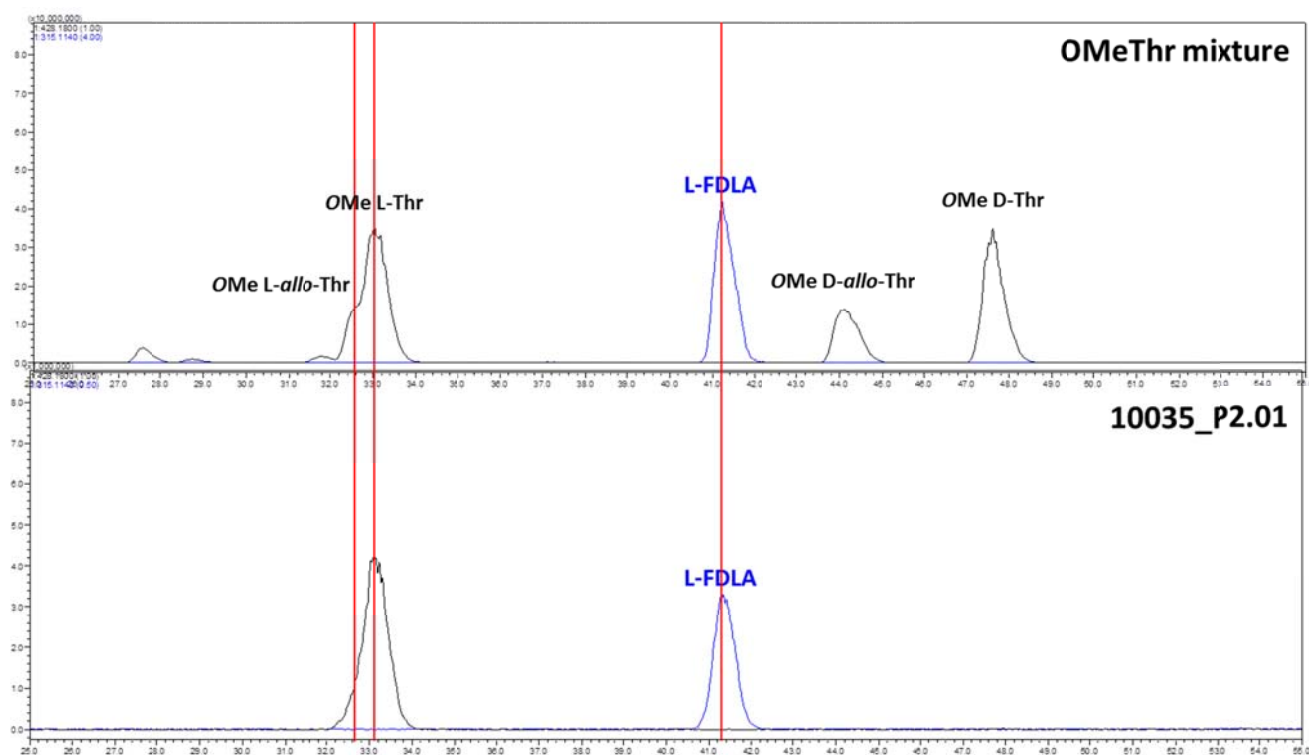

S6.  $^1\text{H}$  NMR spectrum (600 MHz,  $\text{DMSO-}d_6$ ) of **1**

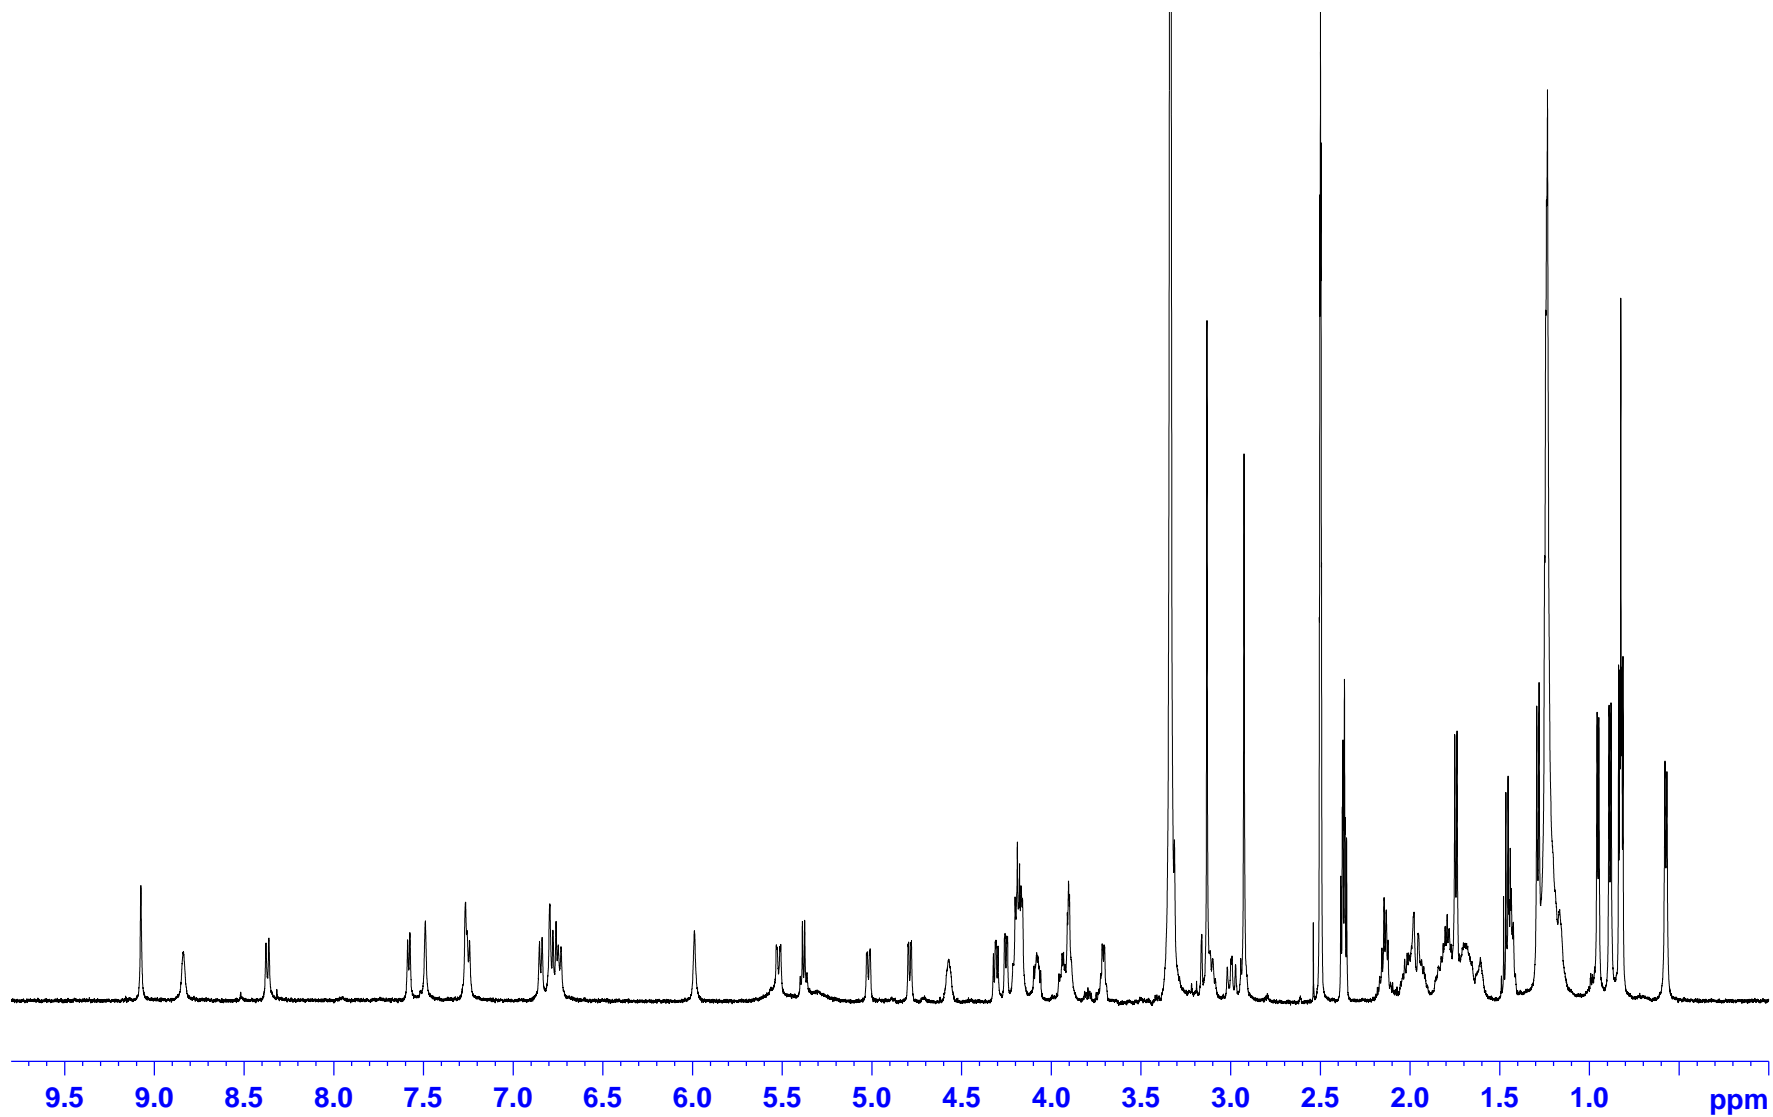

S7. DEPTQ spectrum (226 MHz, DMSO- $d_6$ ) of **1**

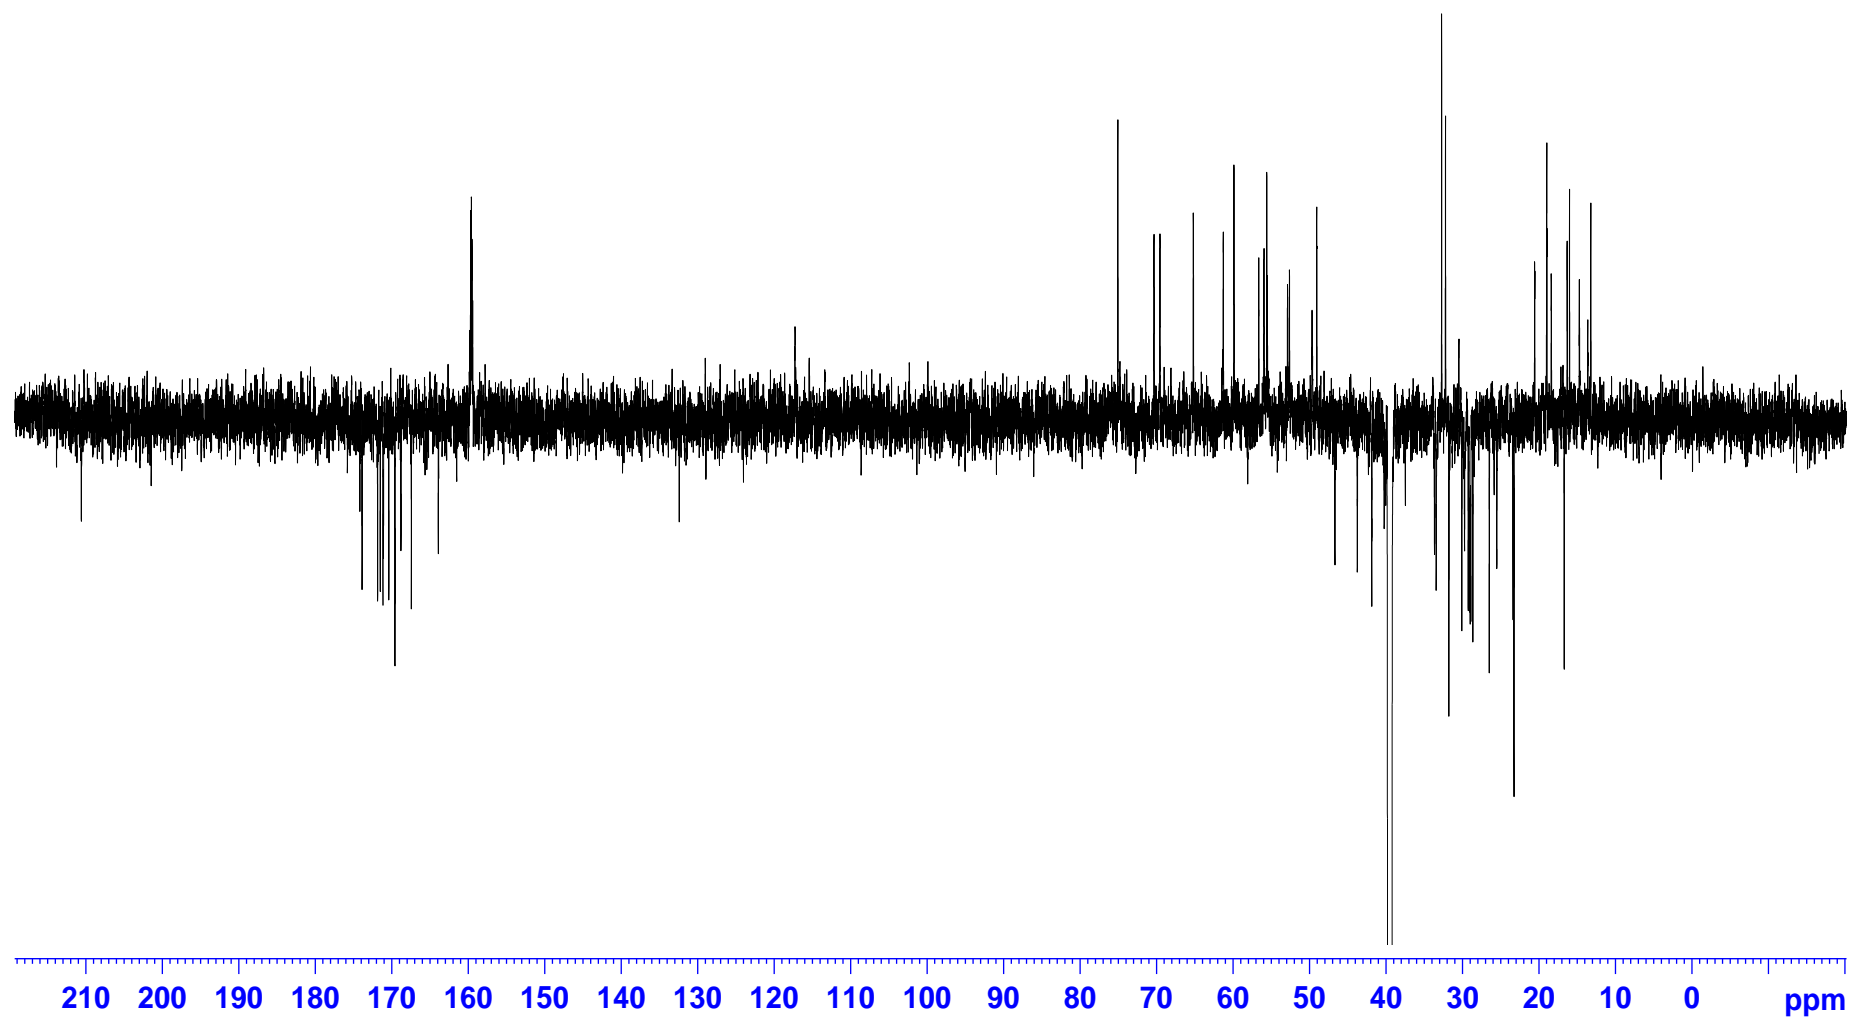

S8. COSY spectrum (600 MHz, DMSO- $d_6$ ) of **1**

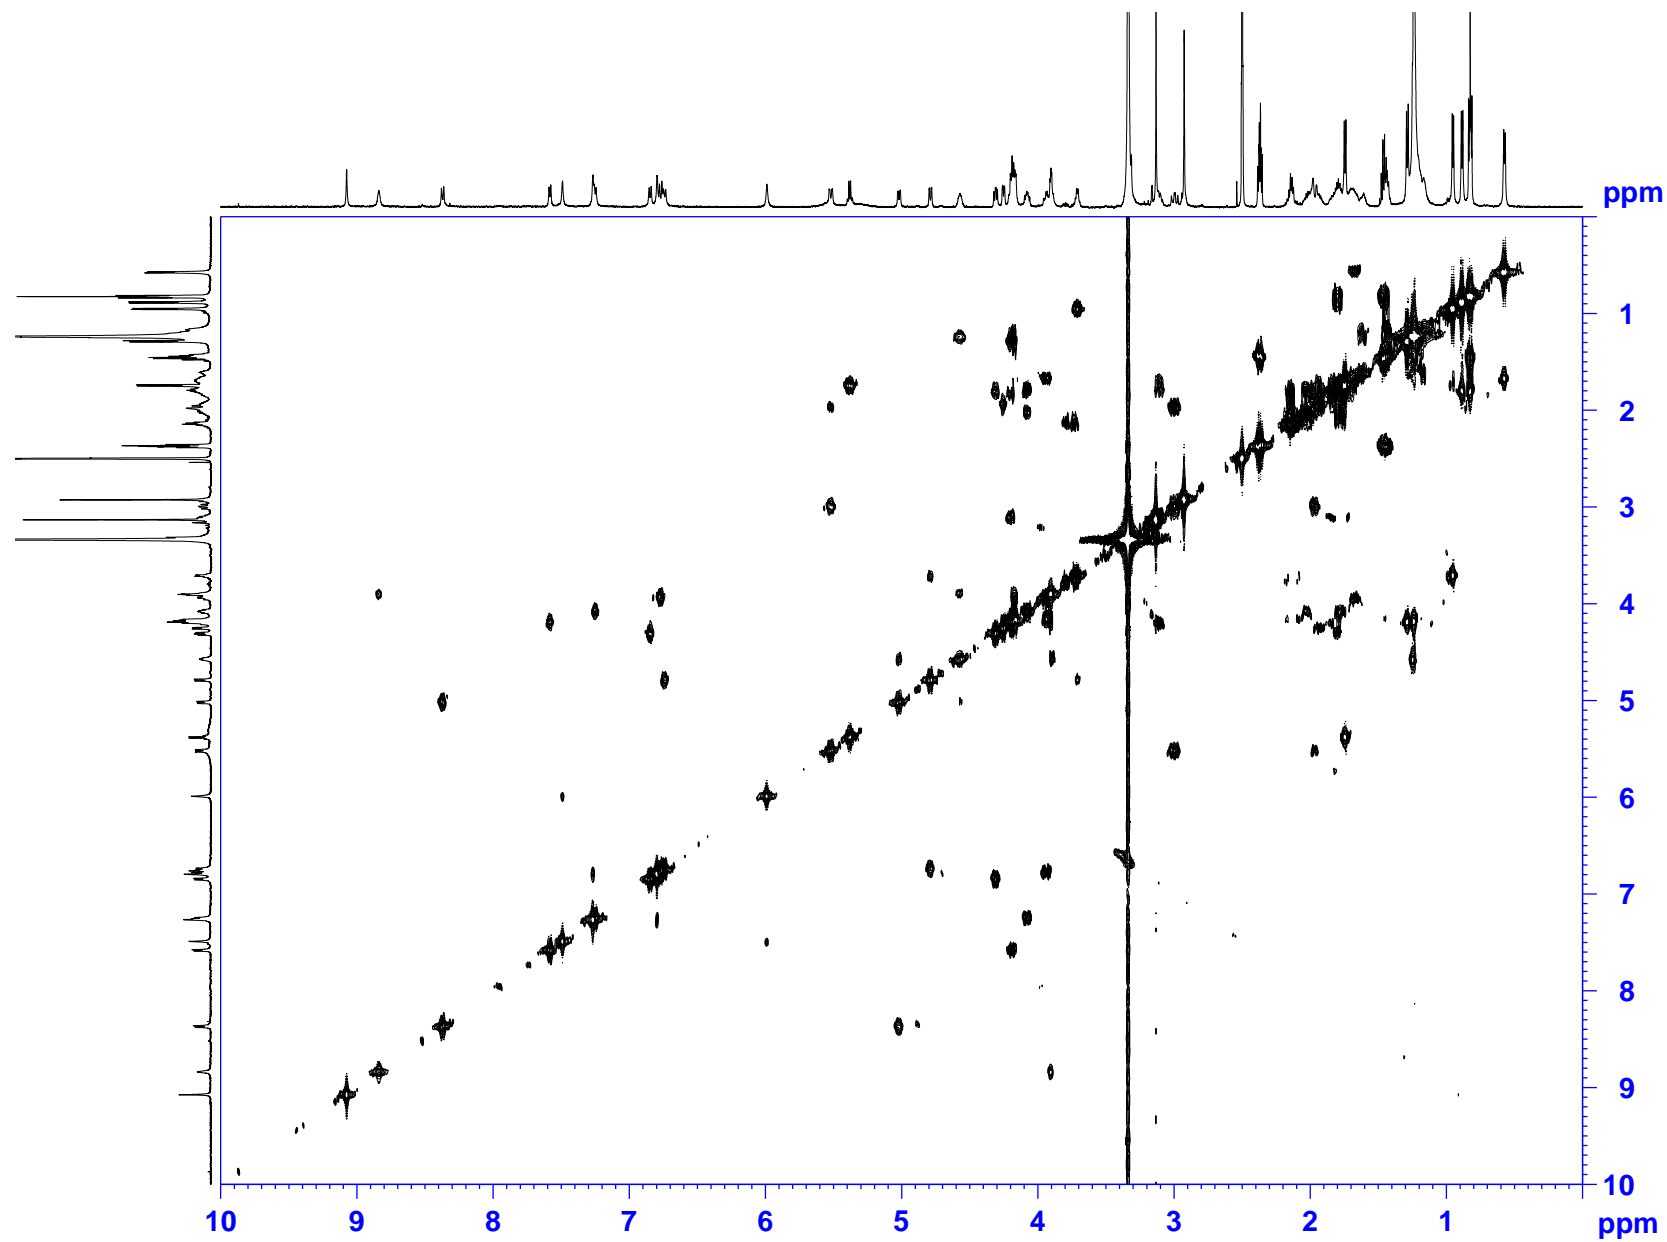

S9. TOCSY spectrum (600 MHz, DMSO-*d*<sub>6</sub>) of **1**

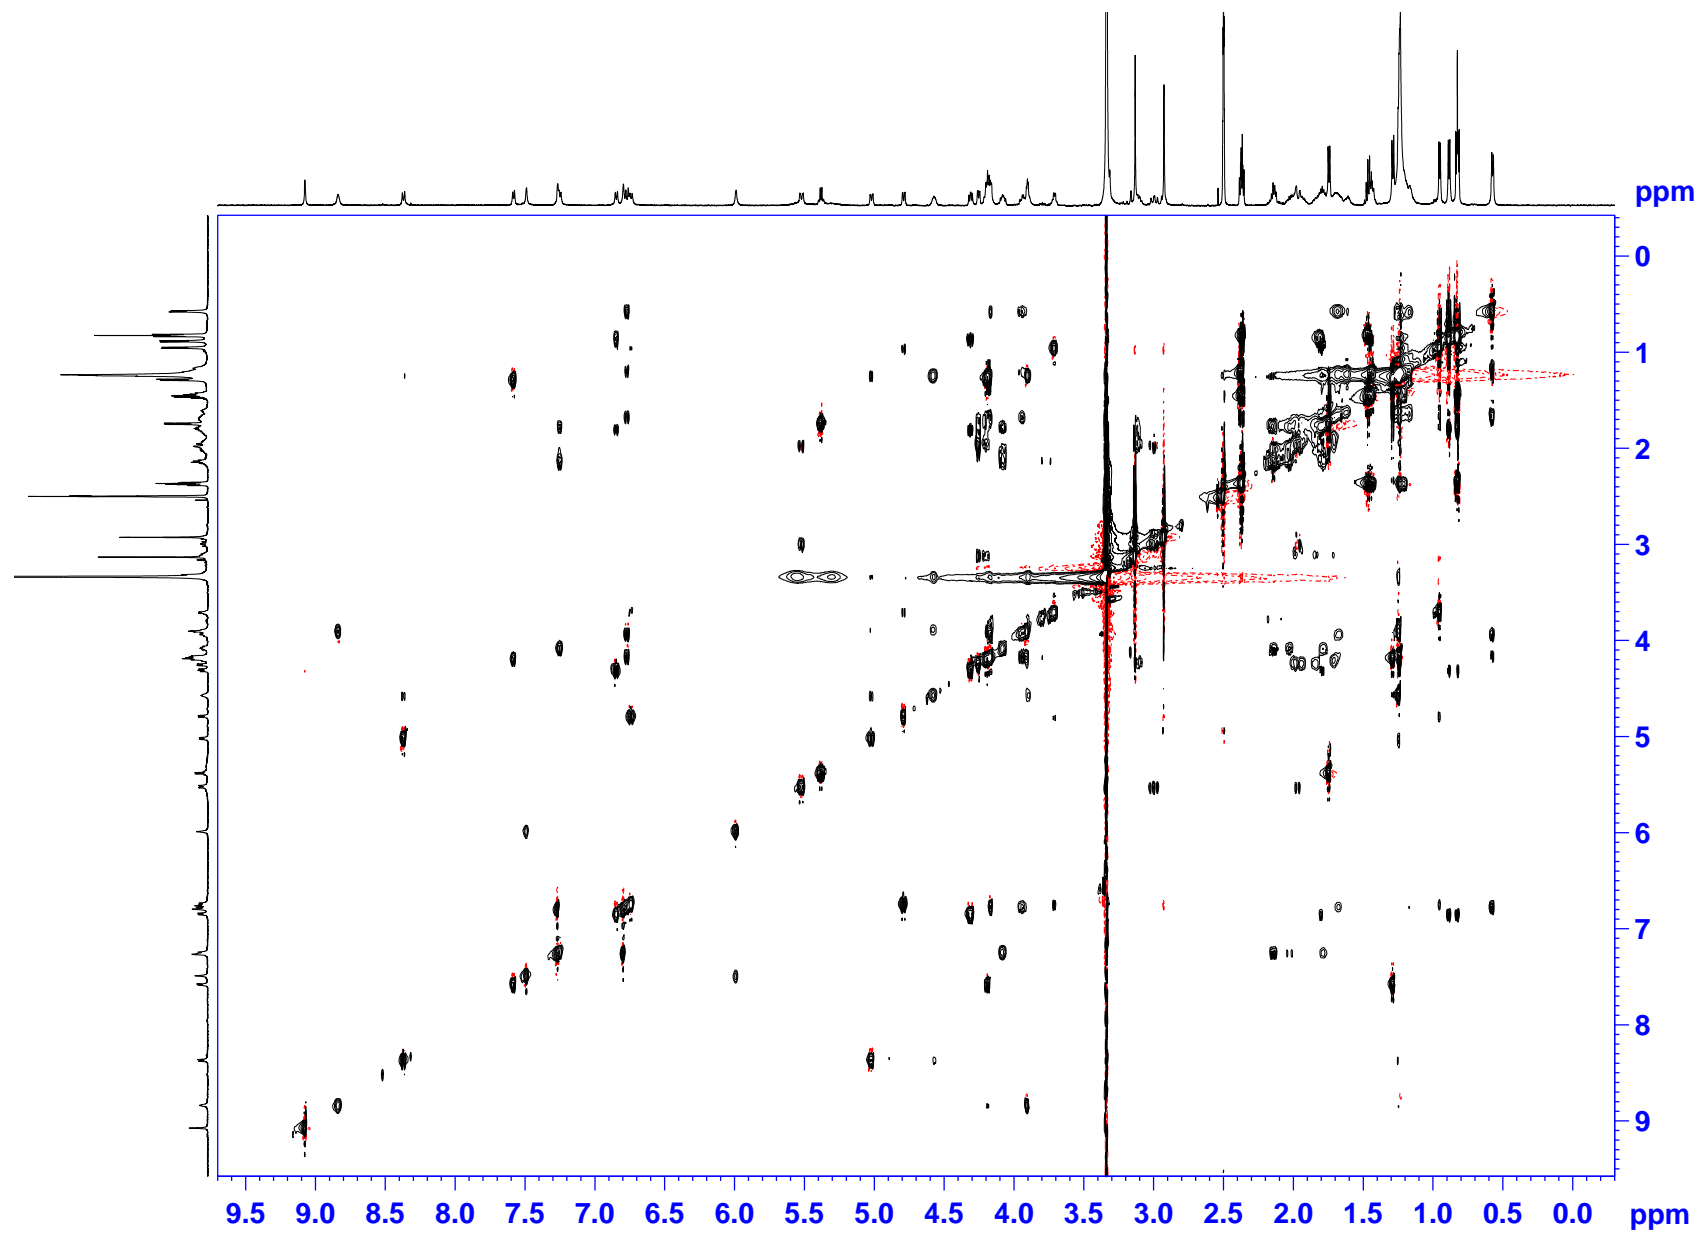

S10. HSQC spectrum (600 MHz, DMSO- $d_6$ ) of **1**

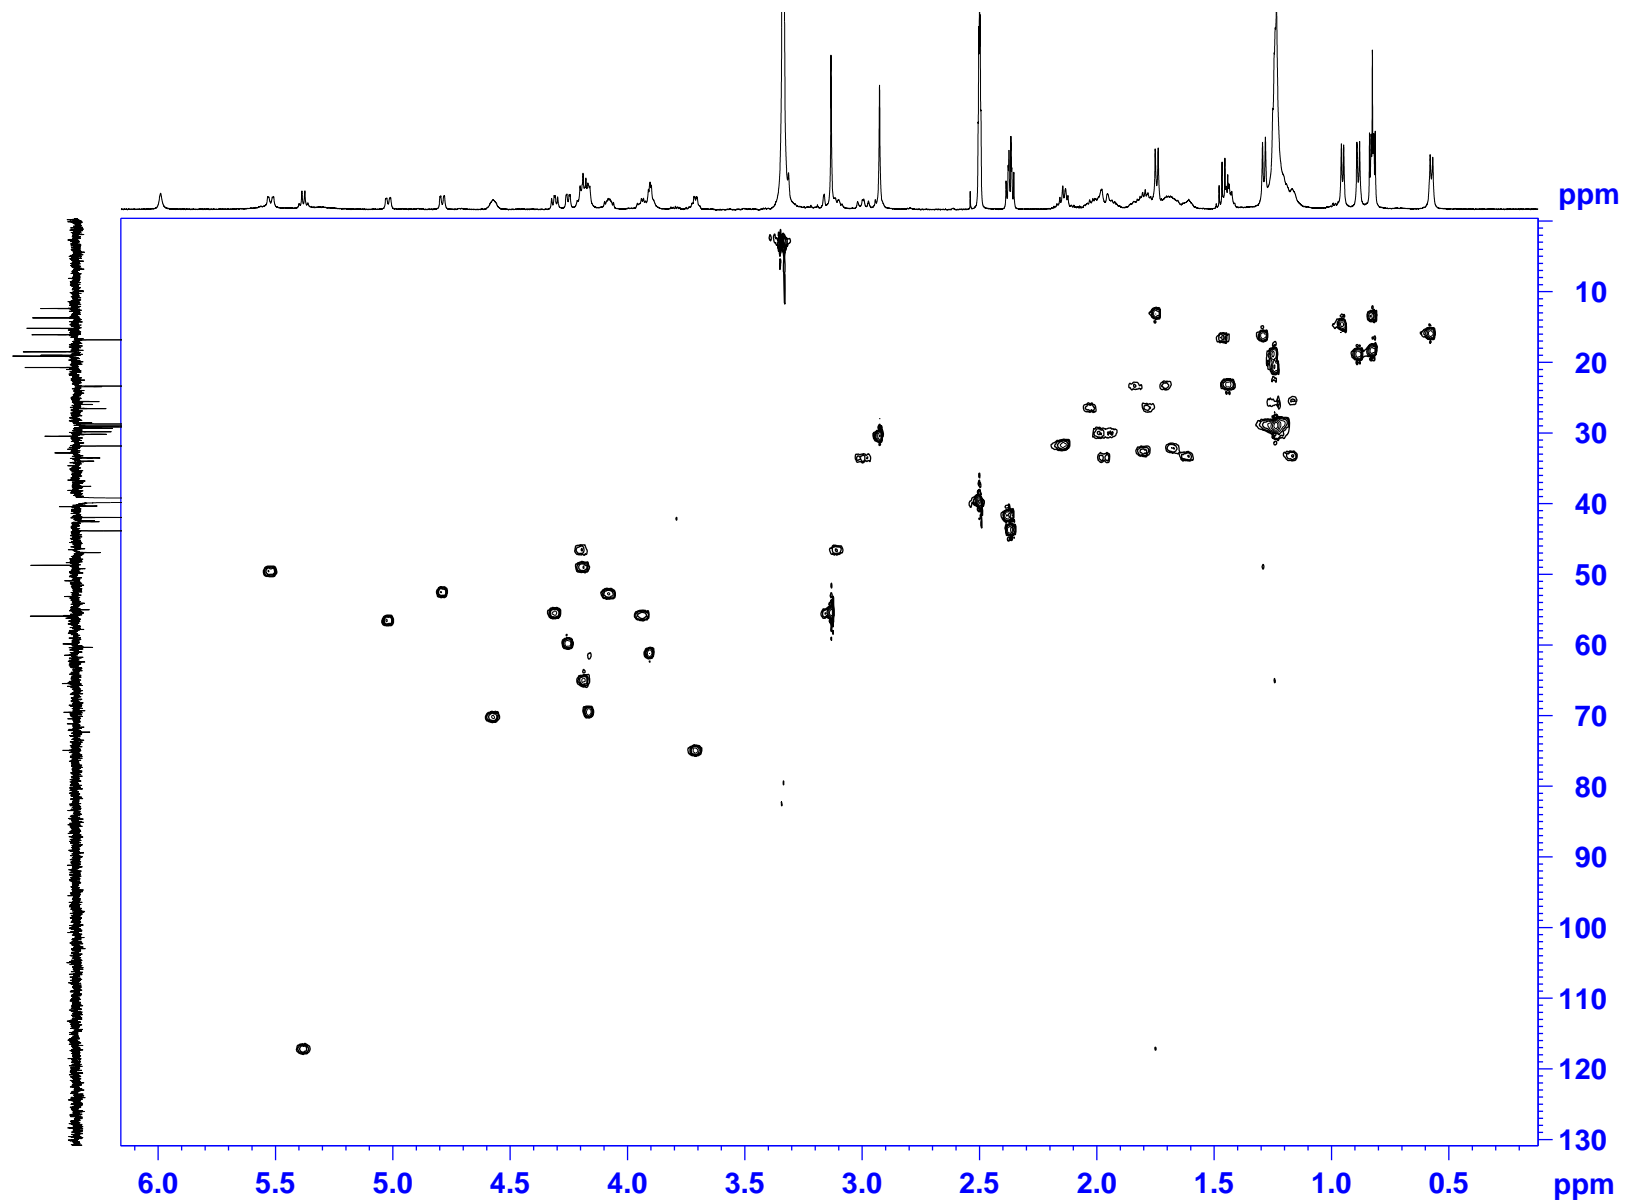

S11. HMBC spectrum (600 MHz, DMSO-*d*<sub>6</sub>) of **1**

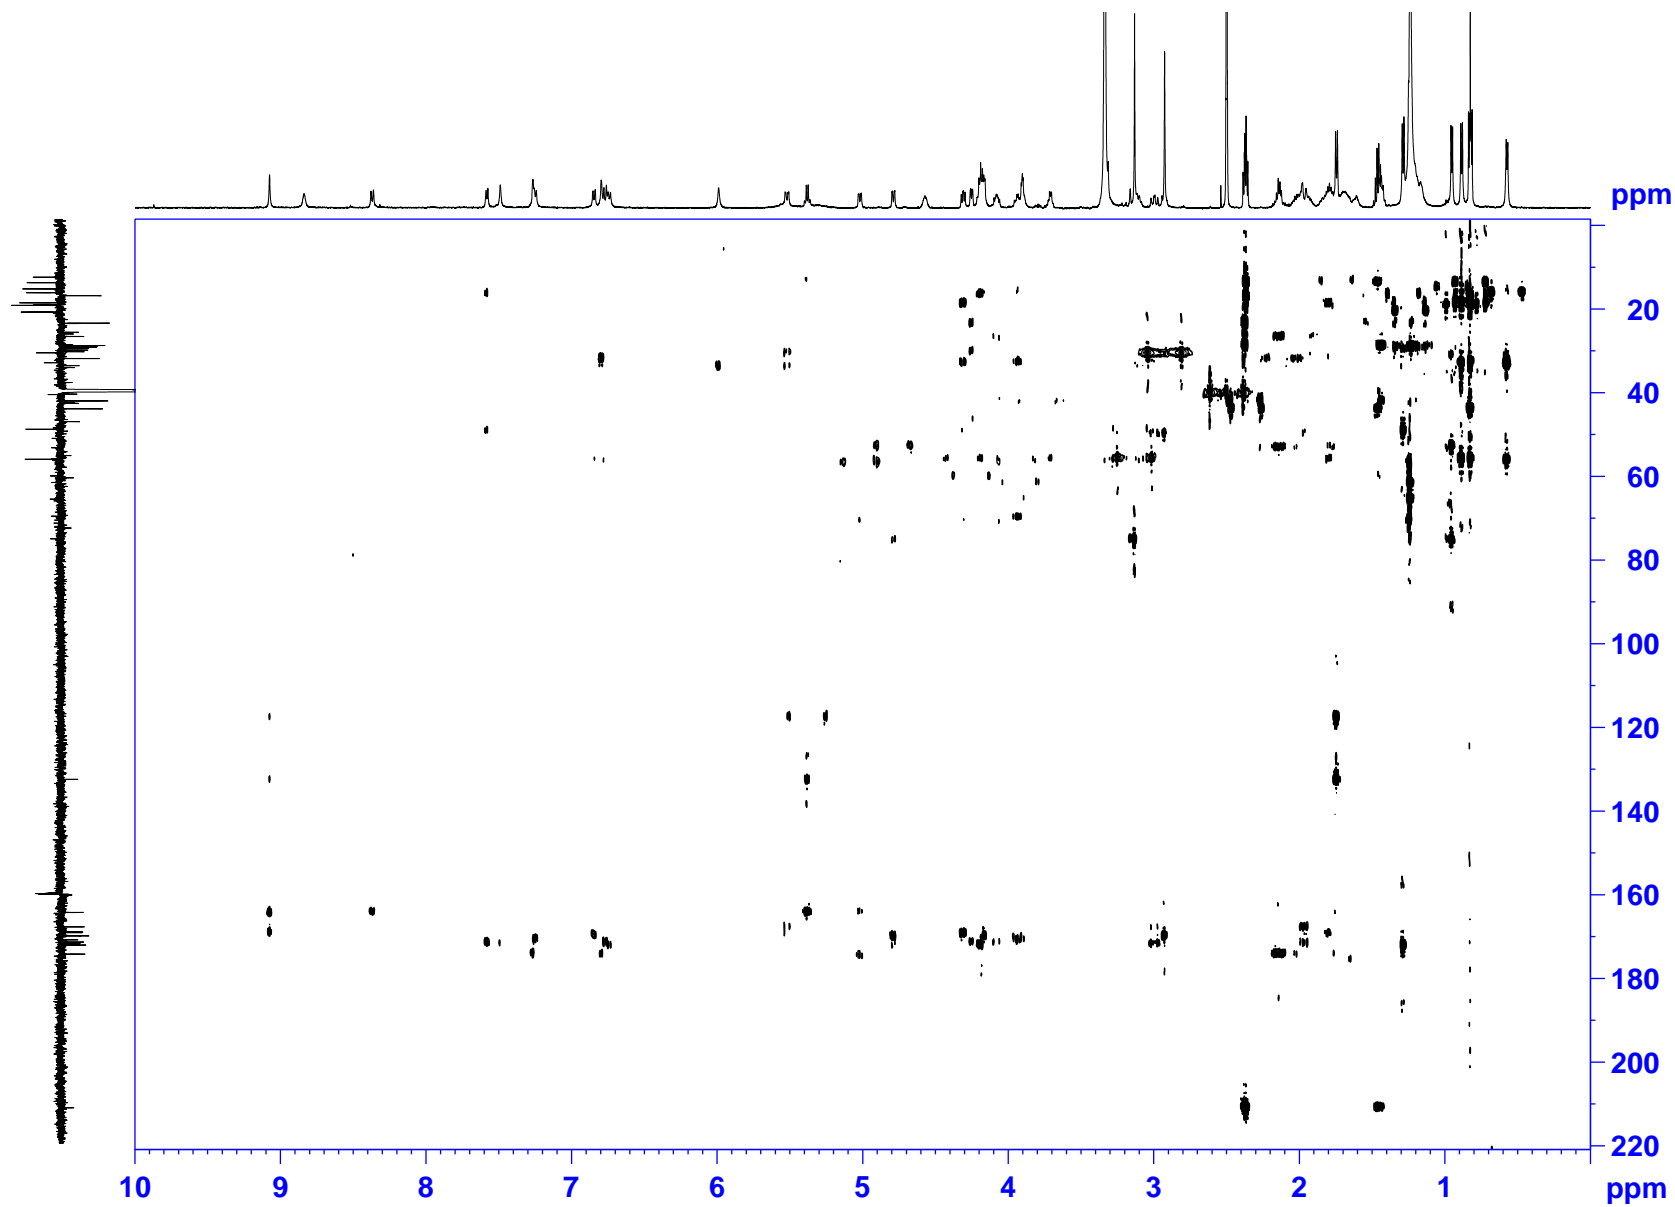

S12. T-ROESY spectrum (600 MHz, DMSO- $d_6$ ) of **1**

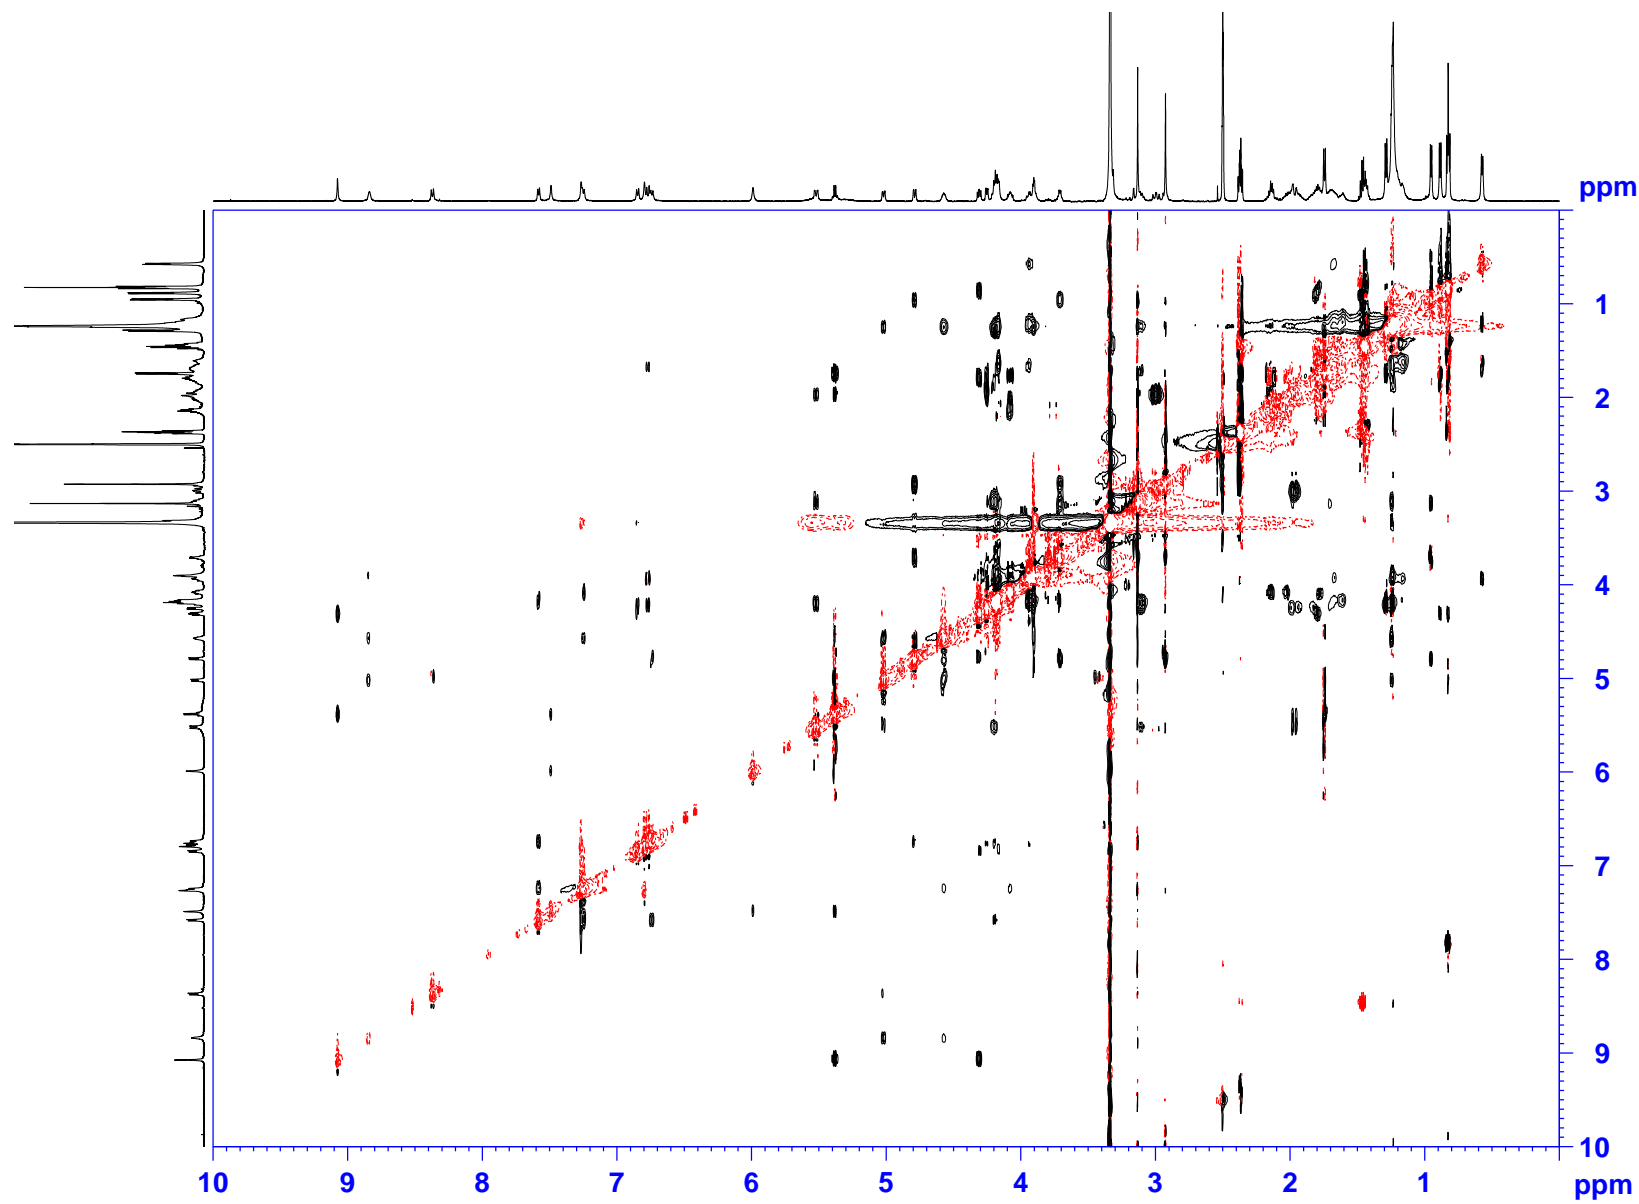



S13.  $^1\text{H}$  NMR spectrum (600 MHz,  $\text{DMSO-}d_6$ ) of **2**

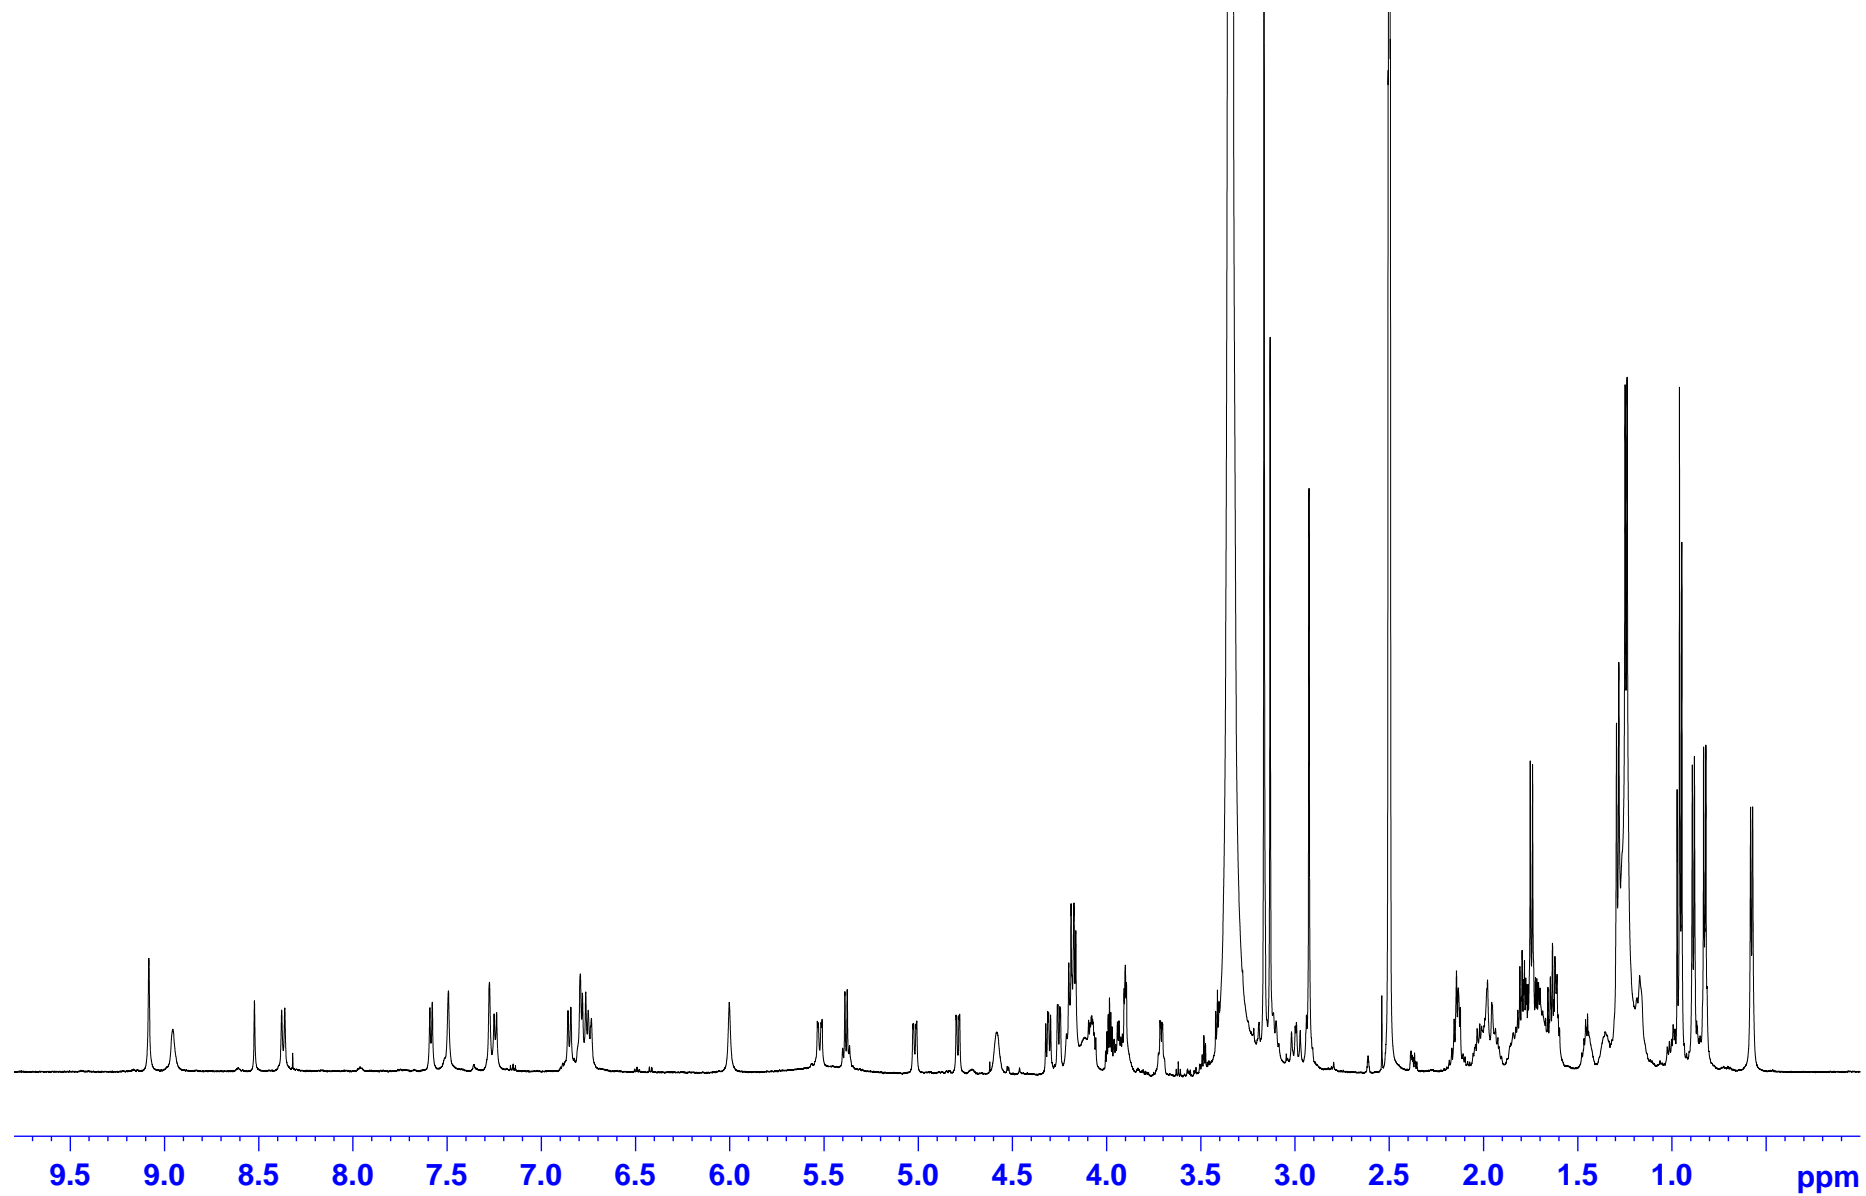

S14. DEPTQ spectrum (226 MHz, DMSO- $d_6$ ) of **2**

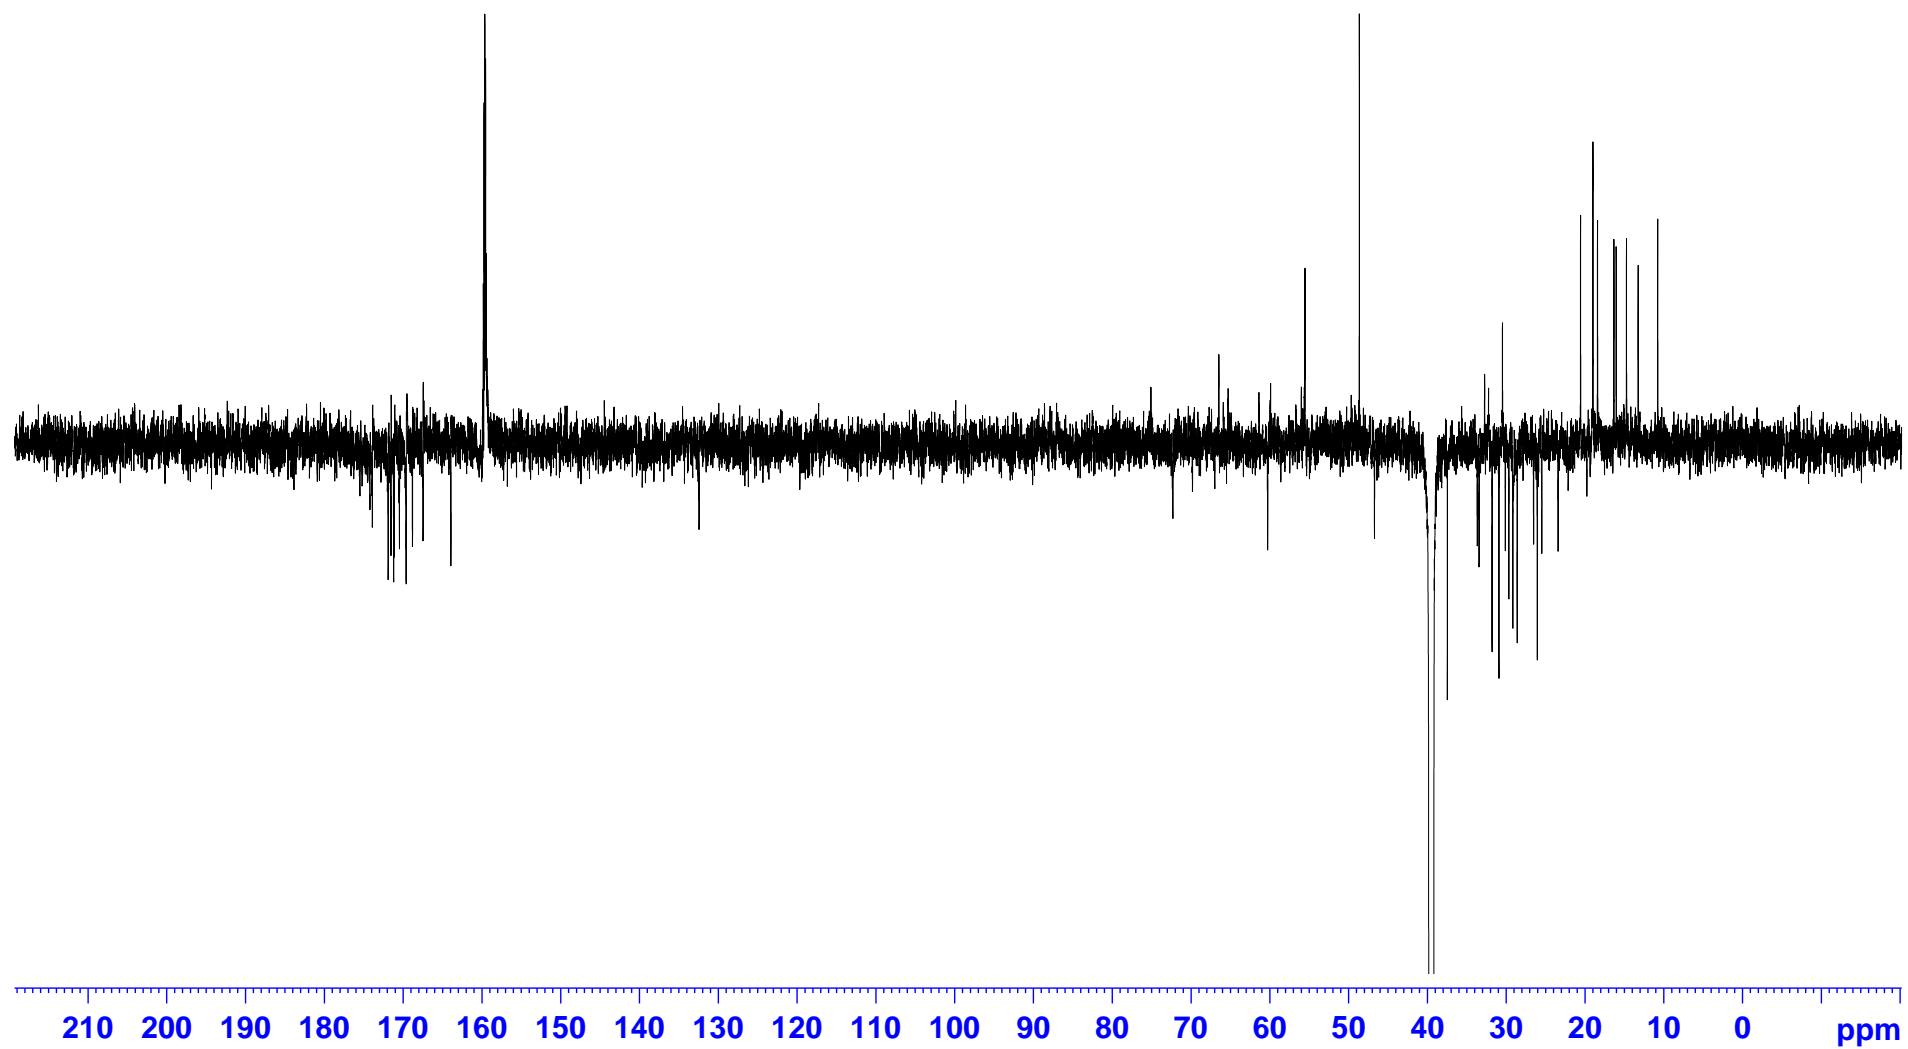

S15. COSY spectrum (600 MHz, DMSO- $d_6$ ) of 2

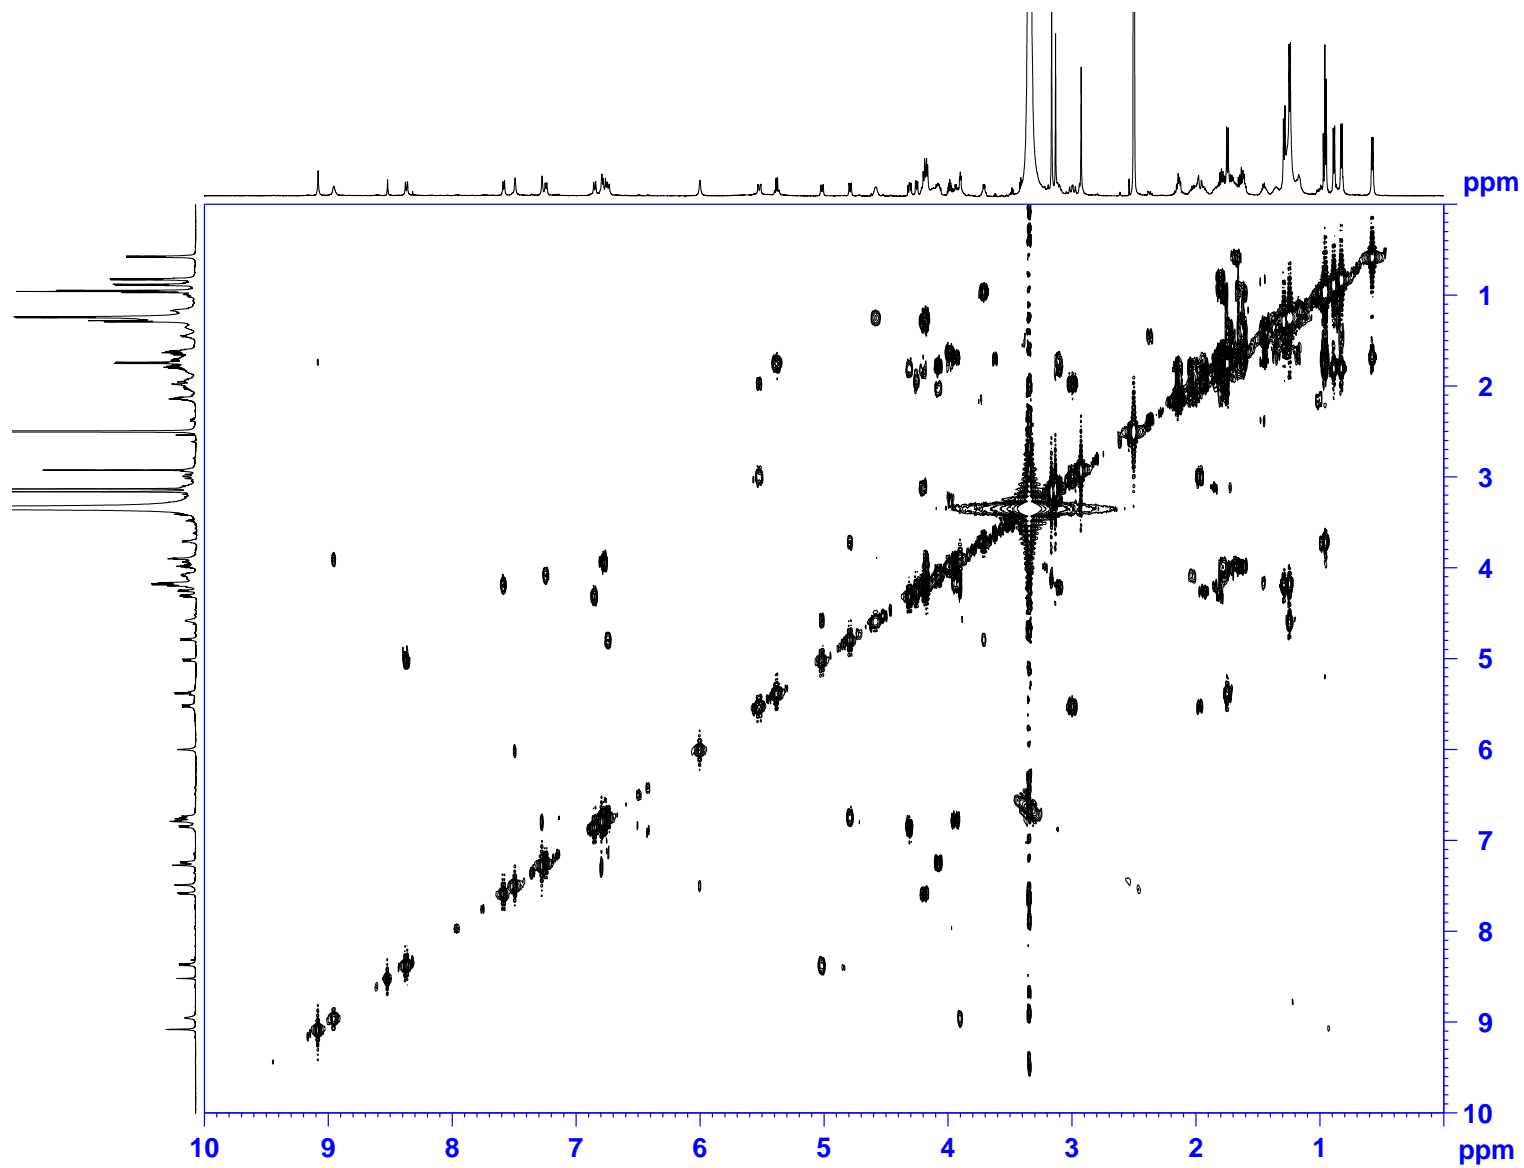

S16. TOCSY spectrum (600 MHz, DMSO- $d_6$ ) of **2**

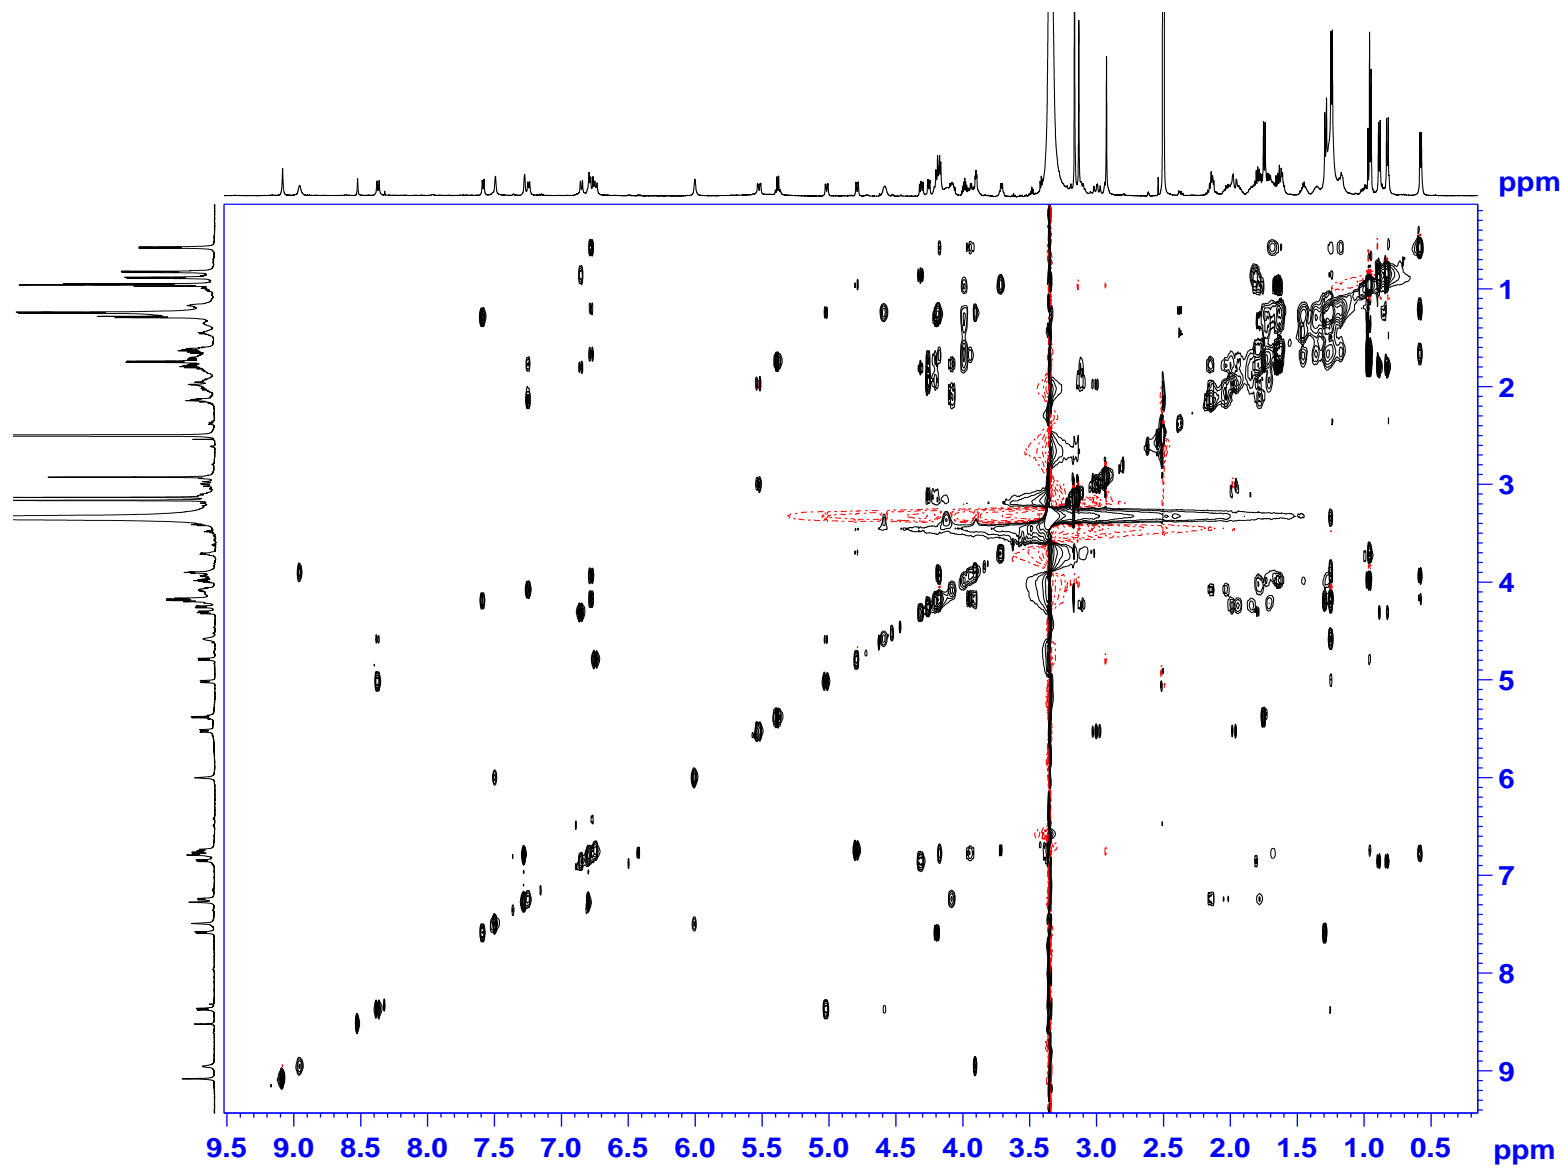

S17. HSQC spectrum (600 MHz, DMSO- $d_6$ ) of **2**

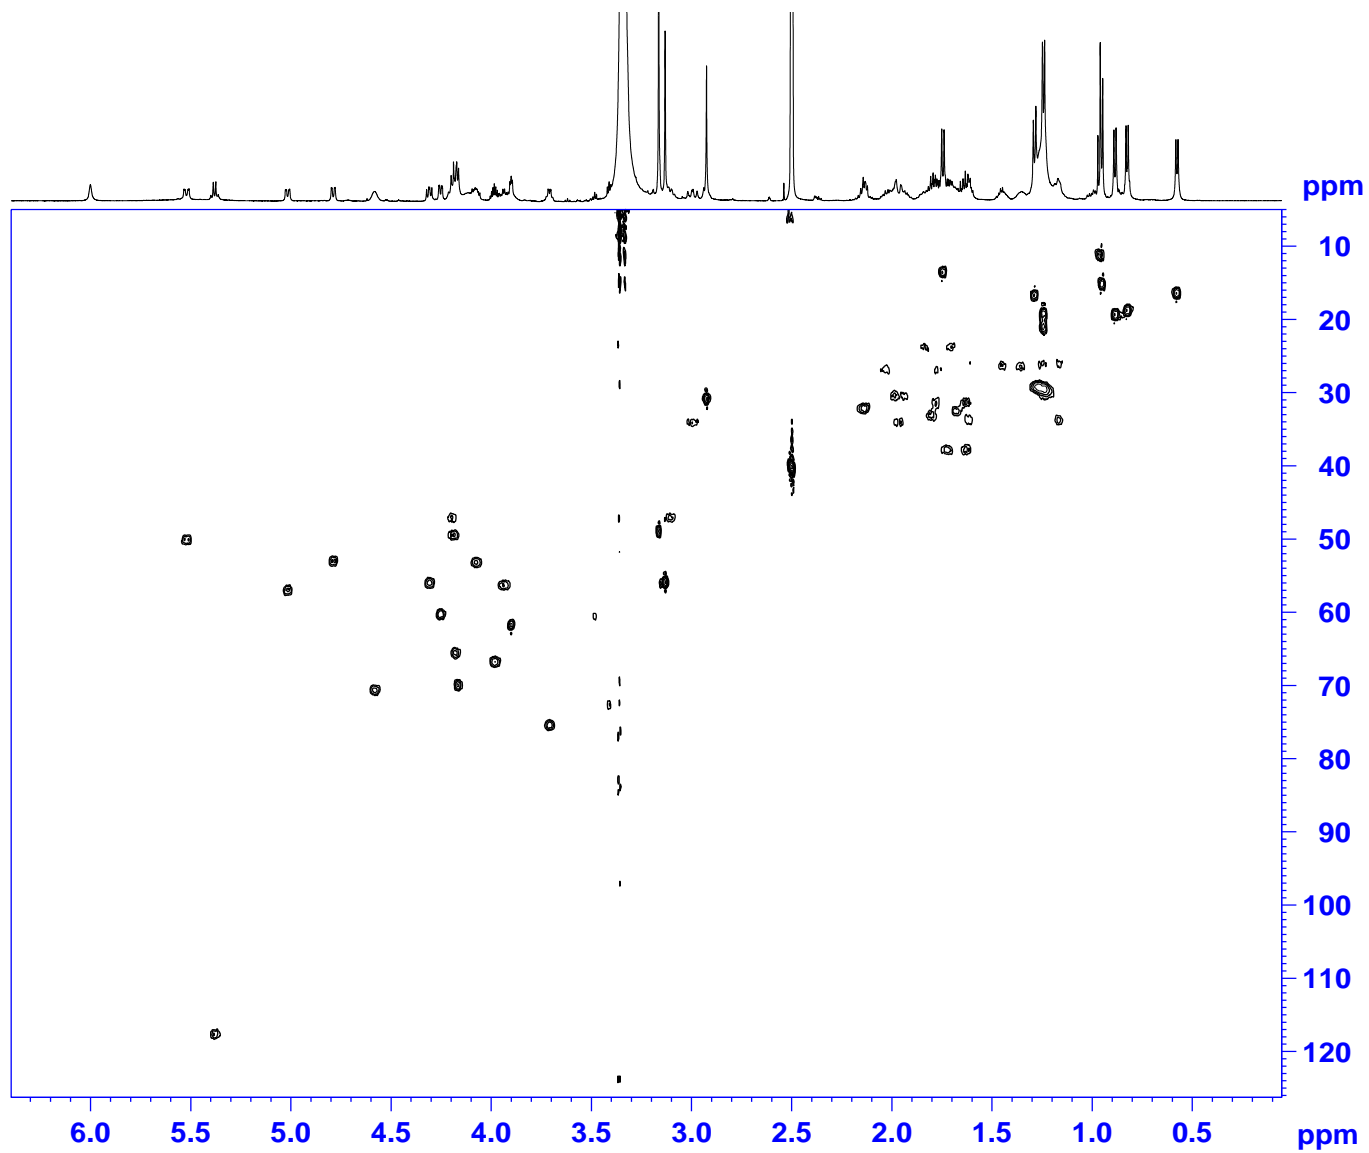

S18. HMBC spectrum (600 MHz, DMSO-*d*<sub>6</sub>) of **2**

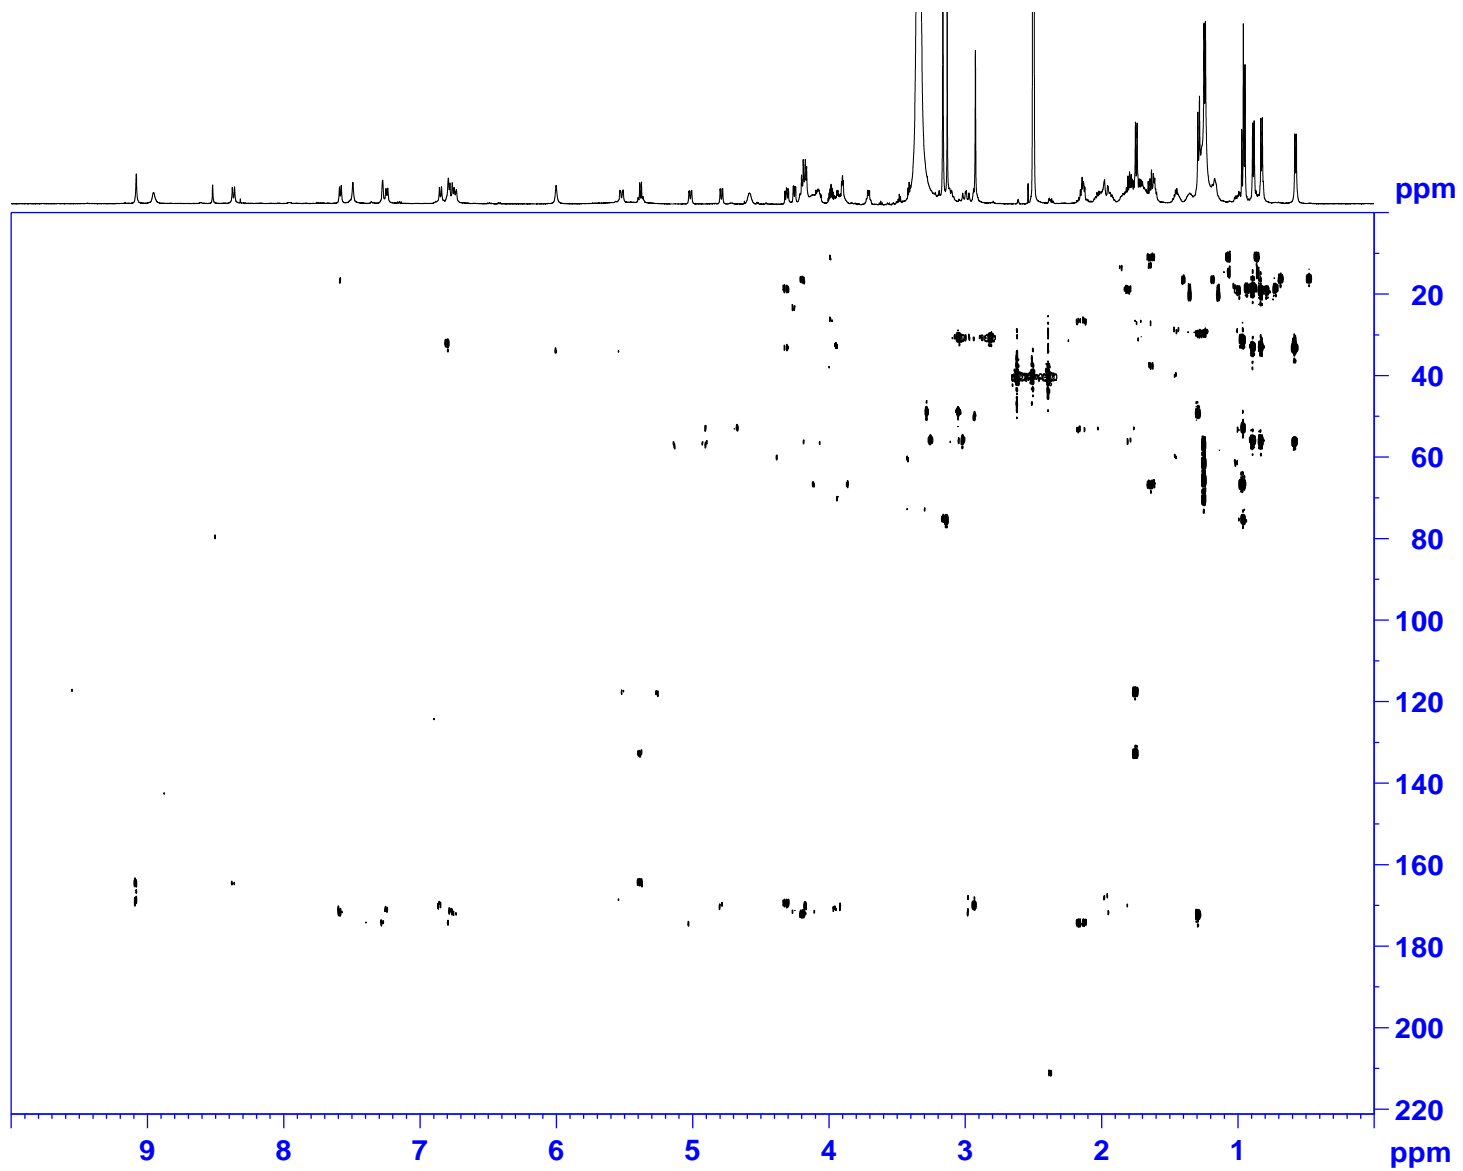

S19.  $^1\text{H}$  NMR spectrum (600 MHz,  $\text{DMSO-}d_6$ ) of **3**

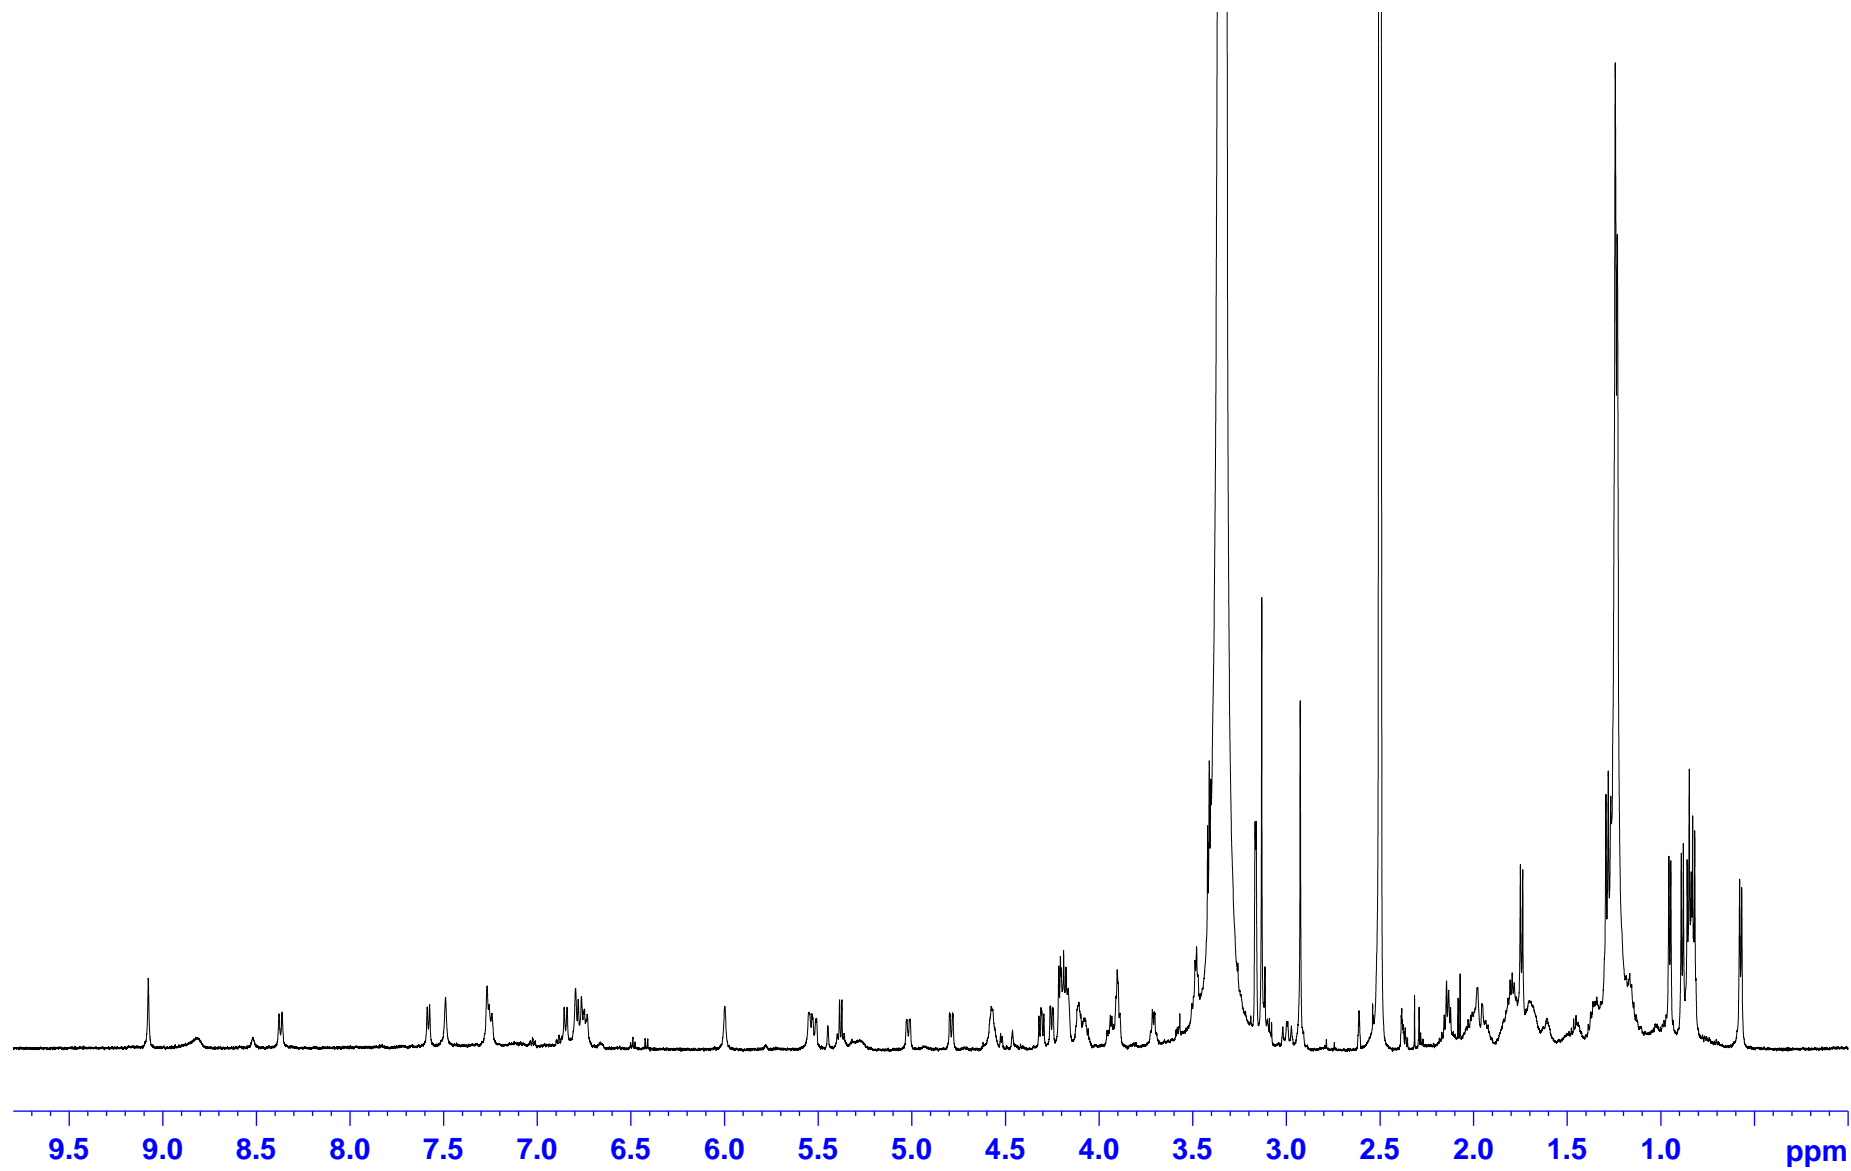

S20. COSY spectrum (600 MHz, DMSO- $d_6$ ) of **3**

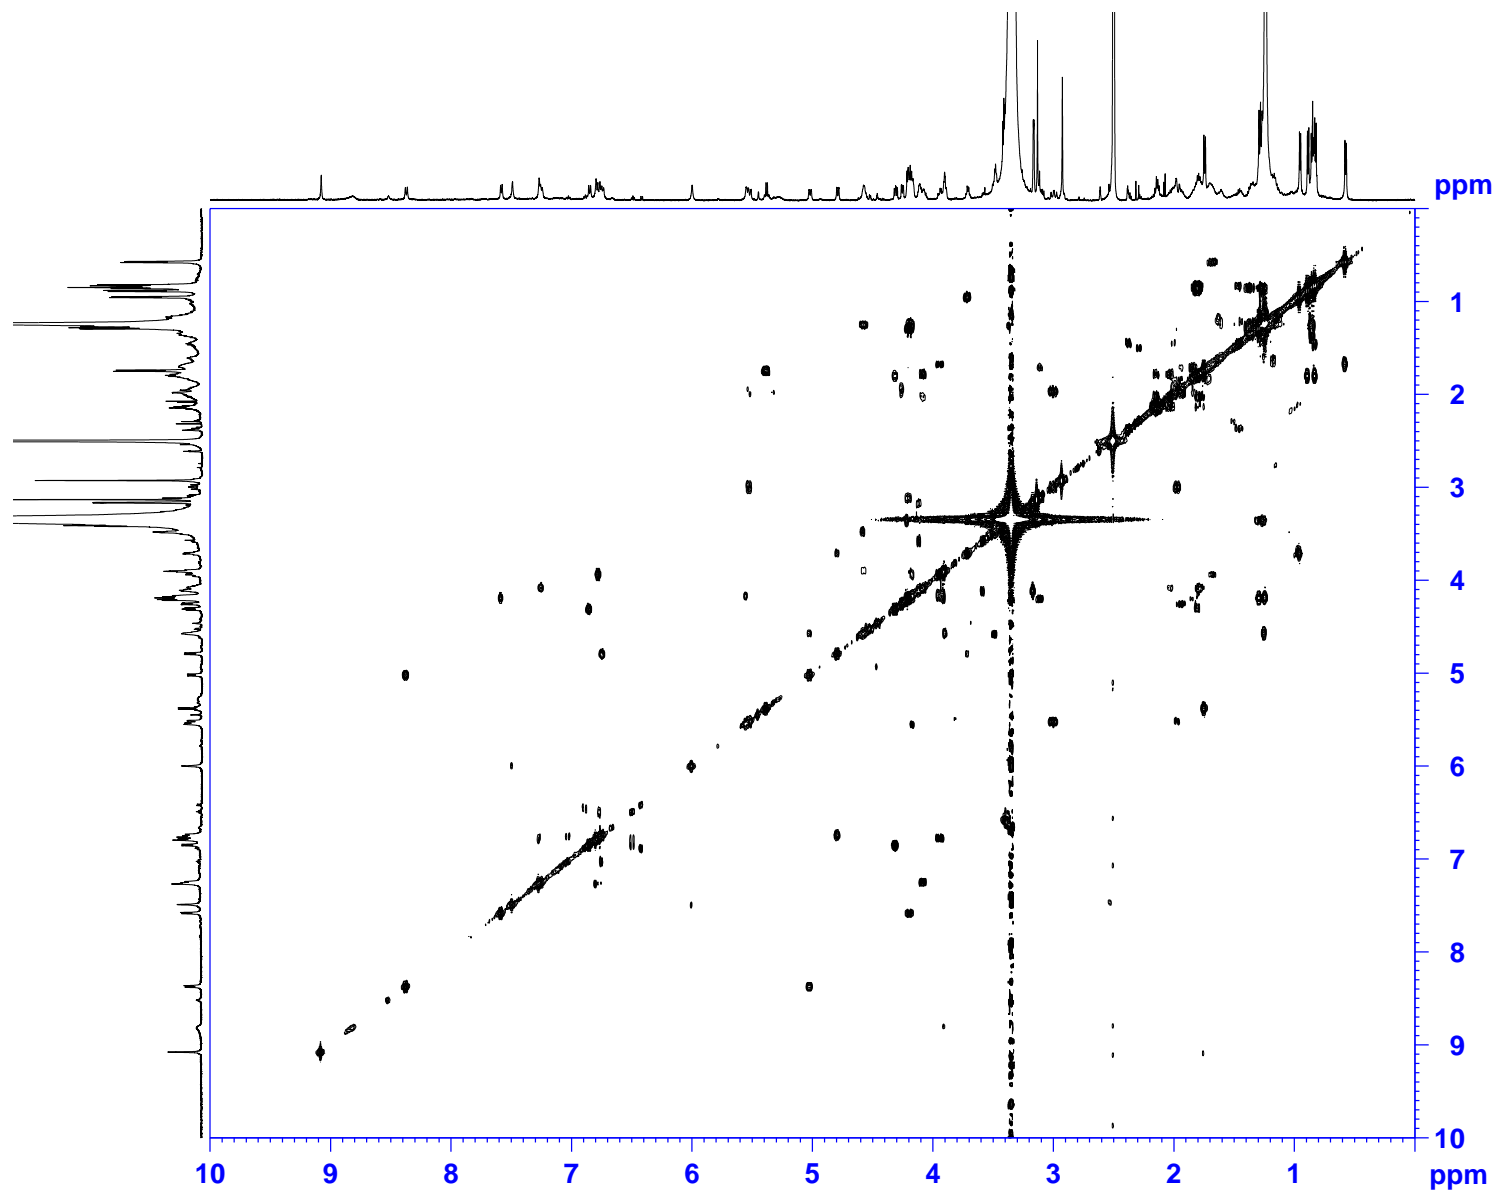



S21. TOCSY spectrum (600 MHz, DMSO- $d_6$ ) of **3**

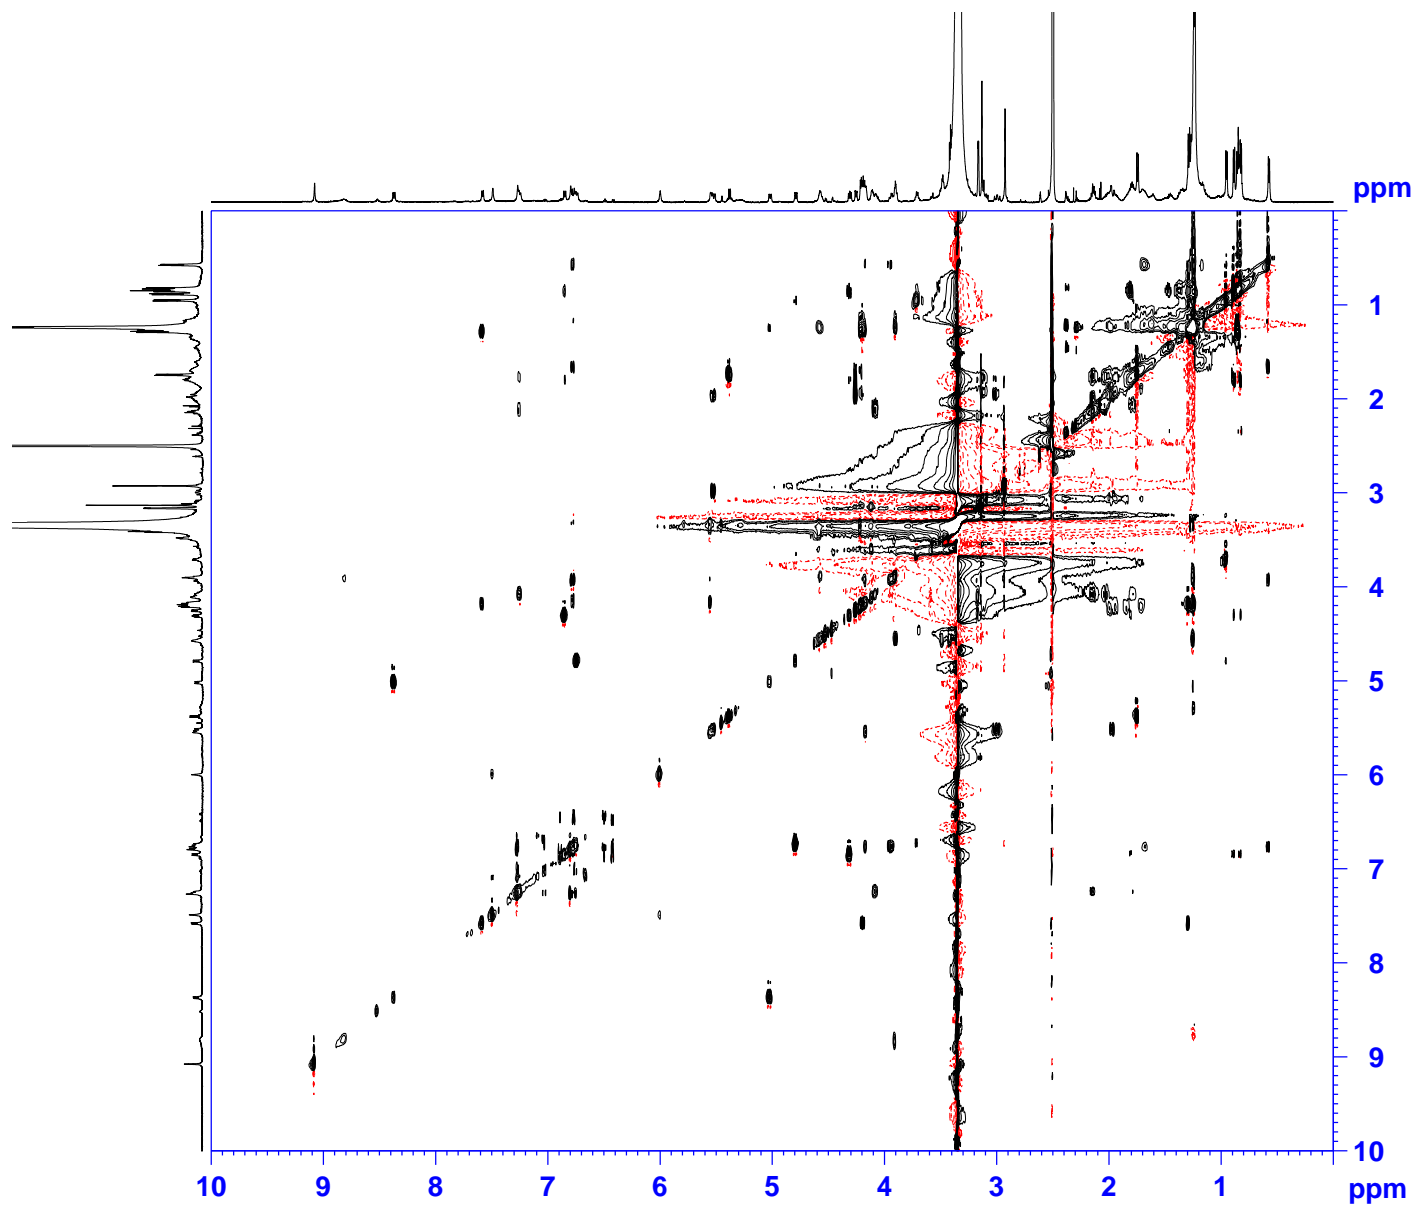

S22. HSQC spectrum (600 MHz, DMSO- $d_6$ ) of **3**

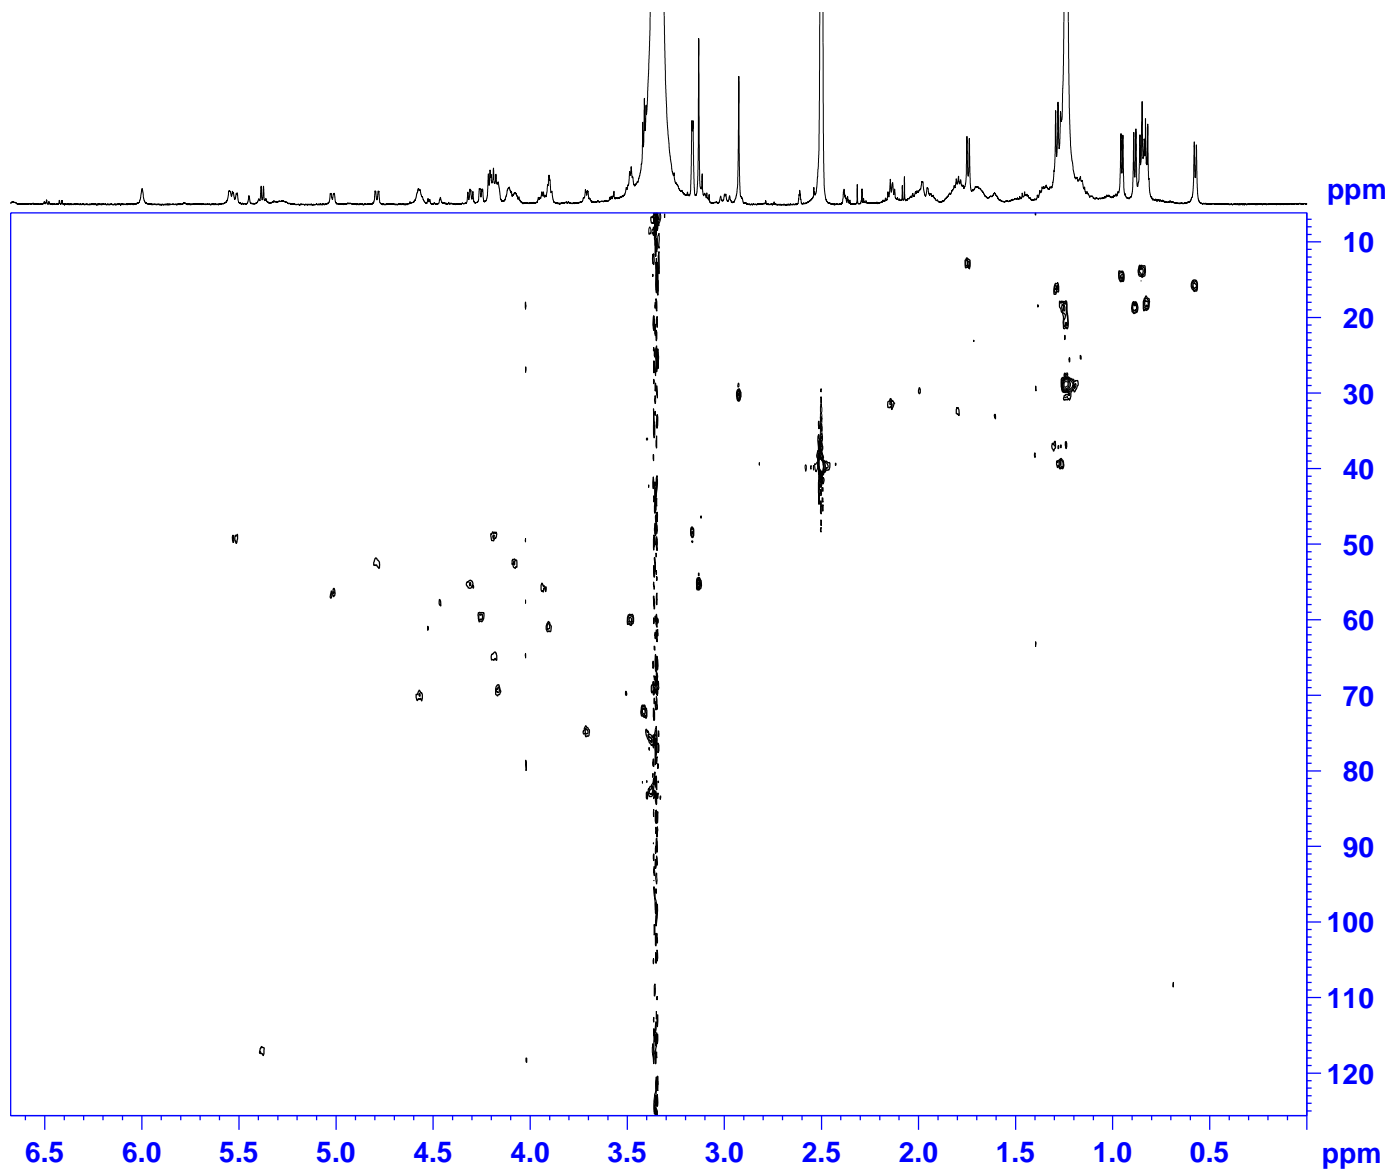

S23.  $^1\text{H}$  NMR spectrum (600 MHz,  $\text{DMSO-}d_6$ ) of **4**

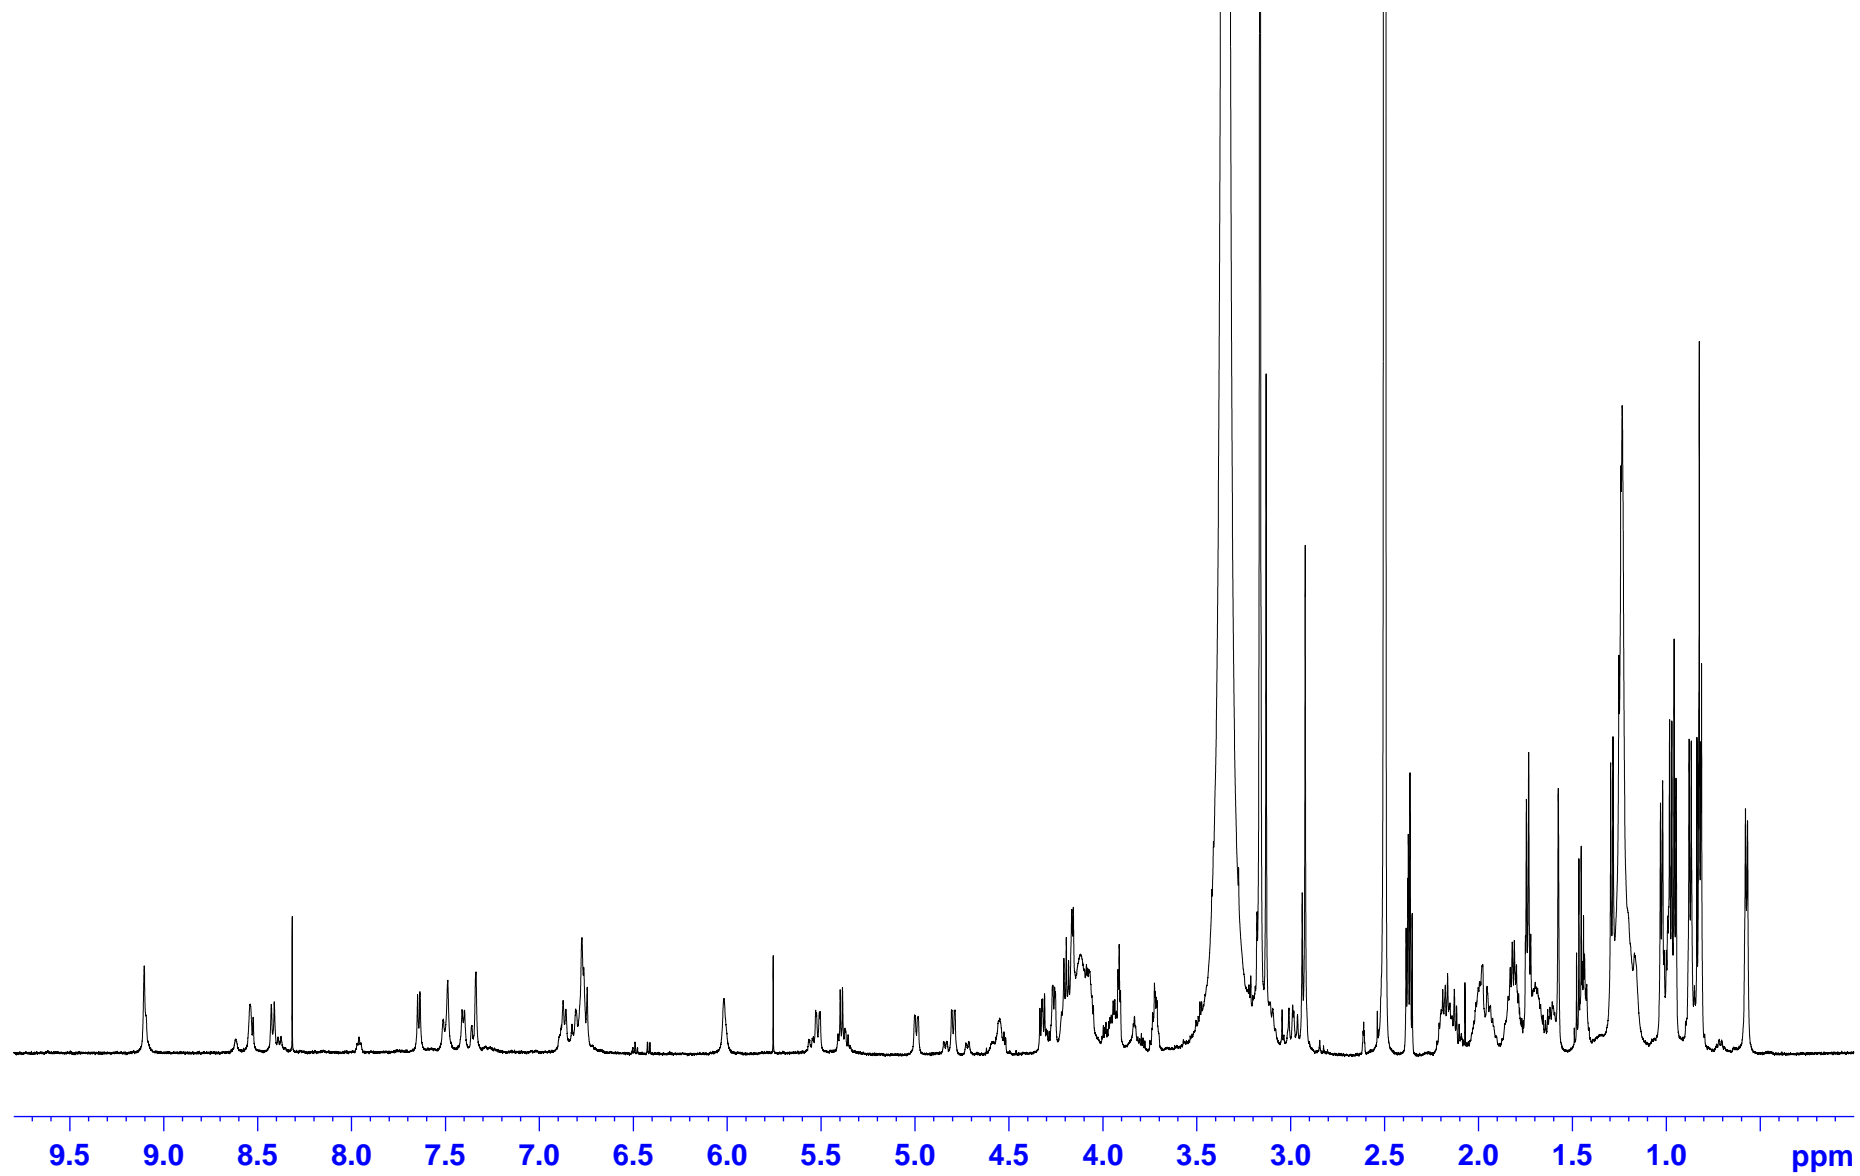

S24. COSY spectrum (600 MHz, DMSO- $d_6$ ) of **4**

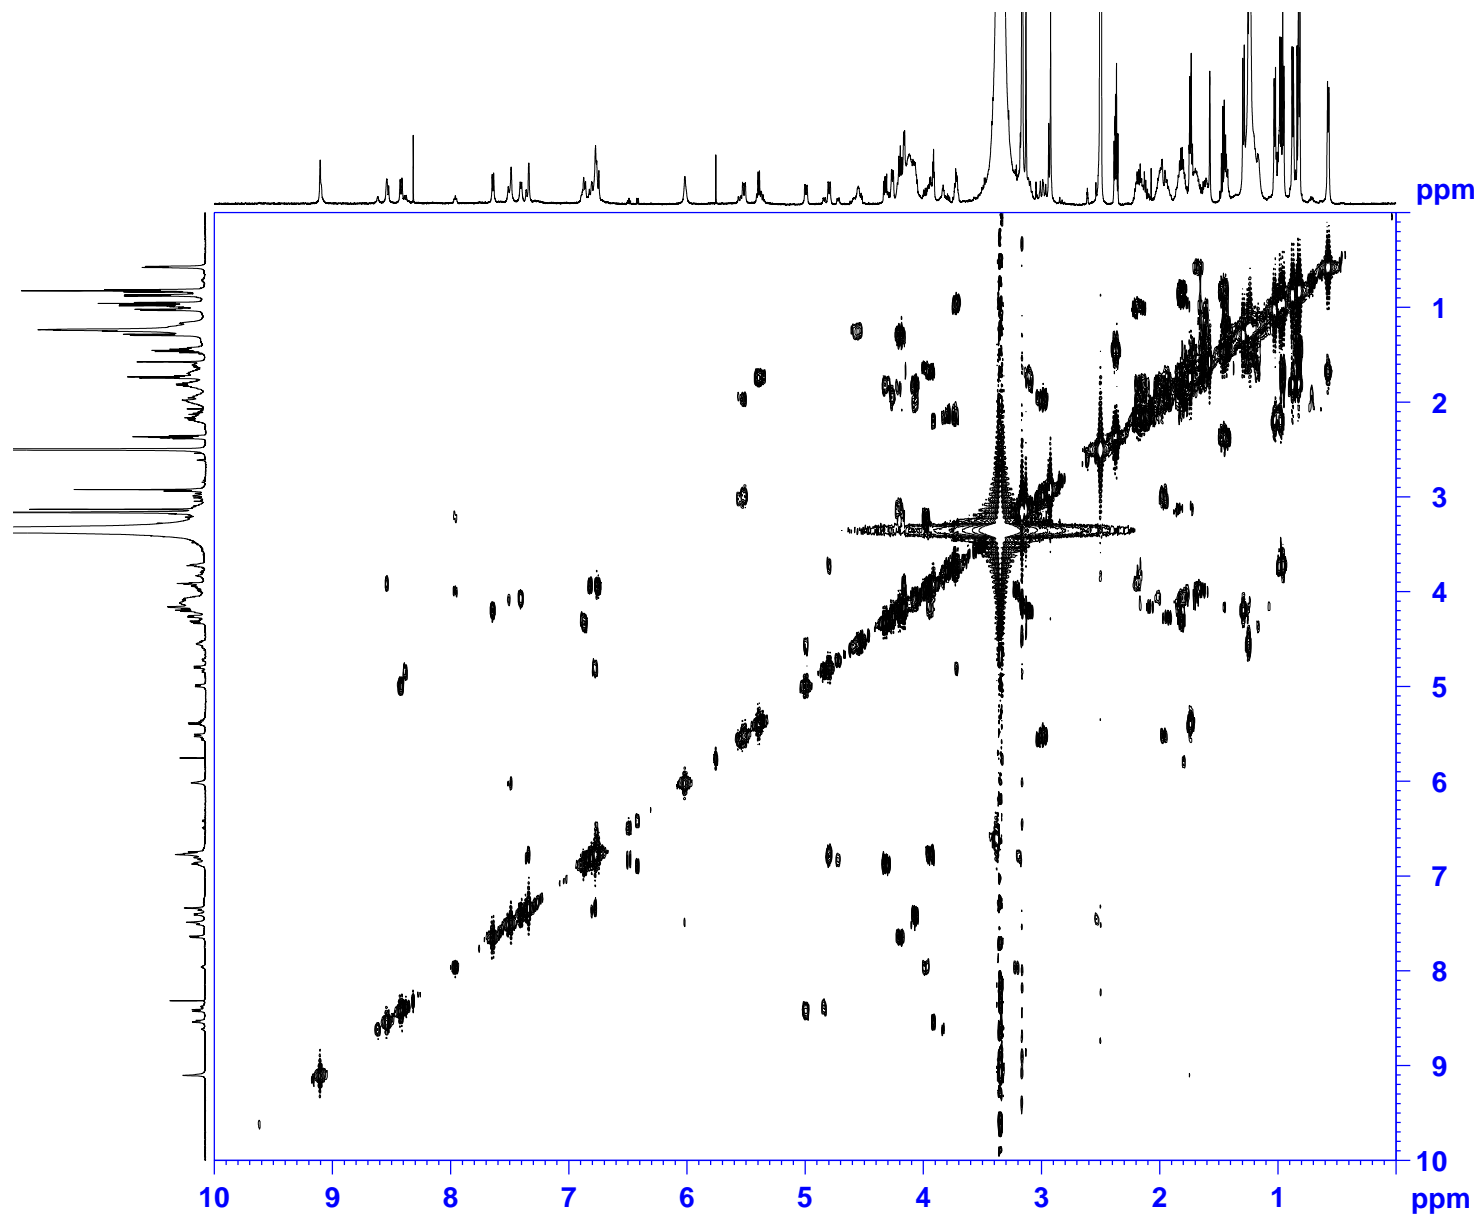

S25. TOCSY spectrum (600 MHz, DMSO- $d_6$ ) of **4**

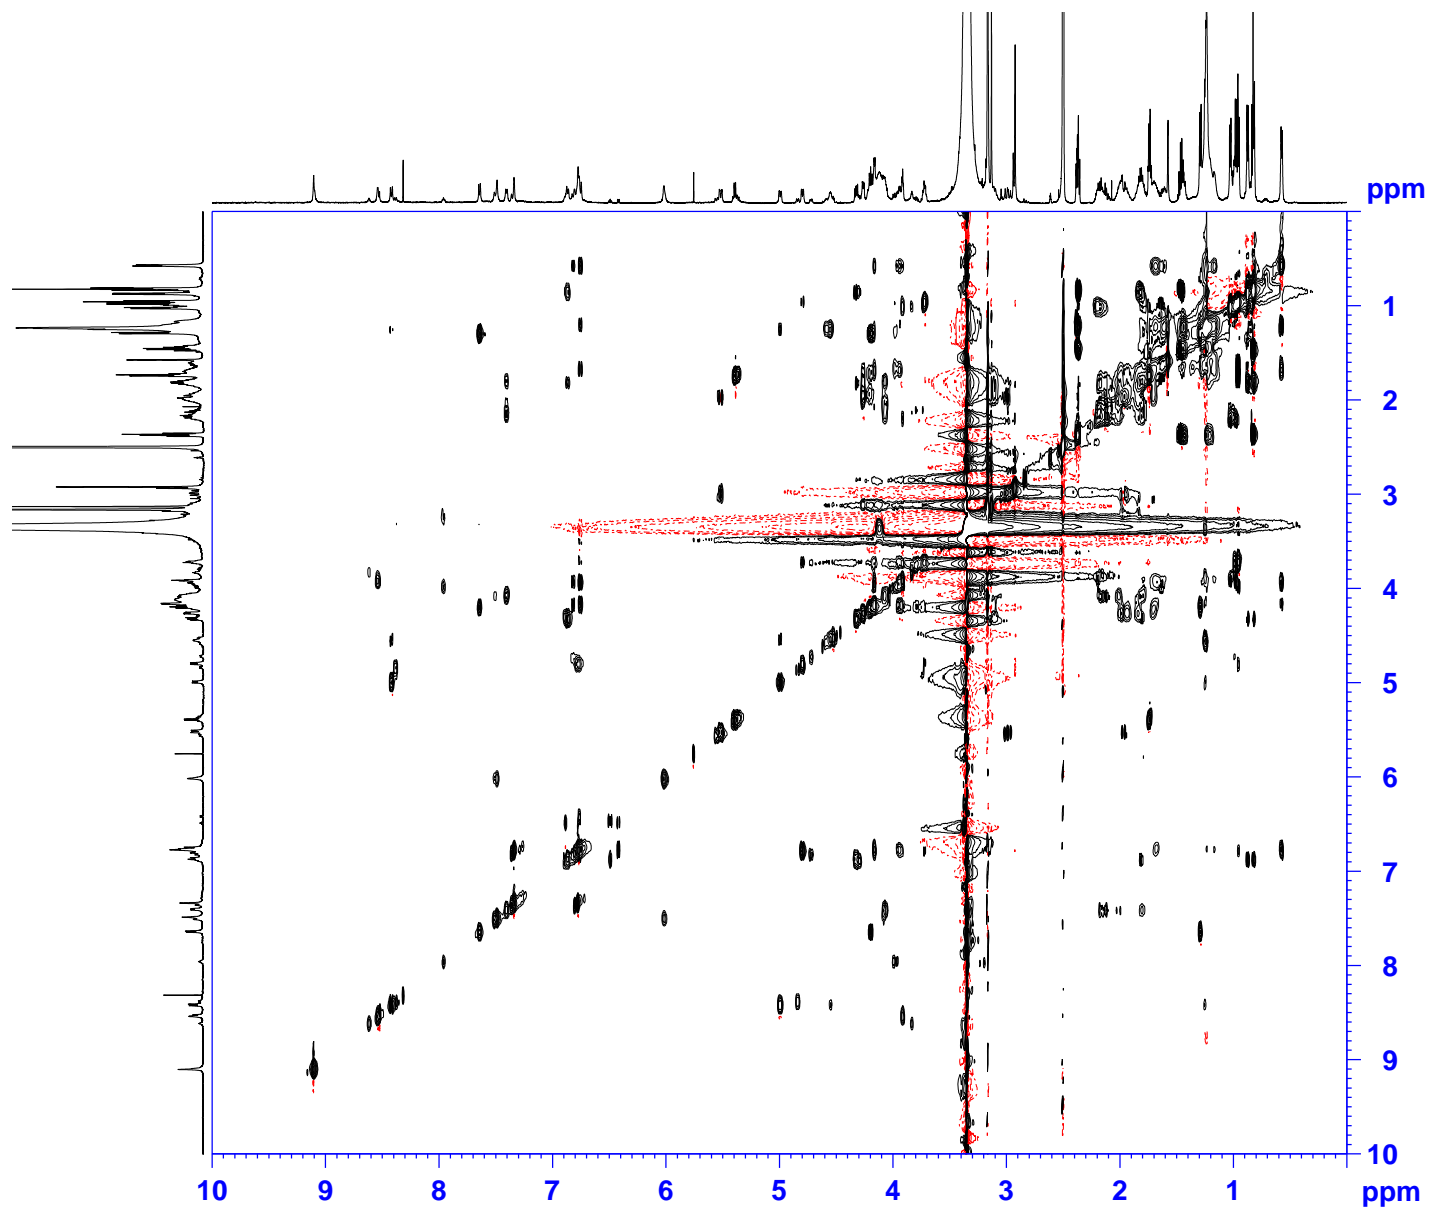

S26. HSQC spectrum (600 MHz, DMSO- $d_6$ ) of **4**

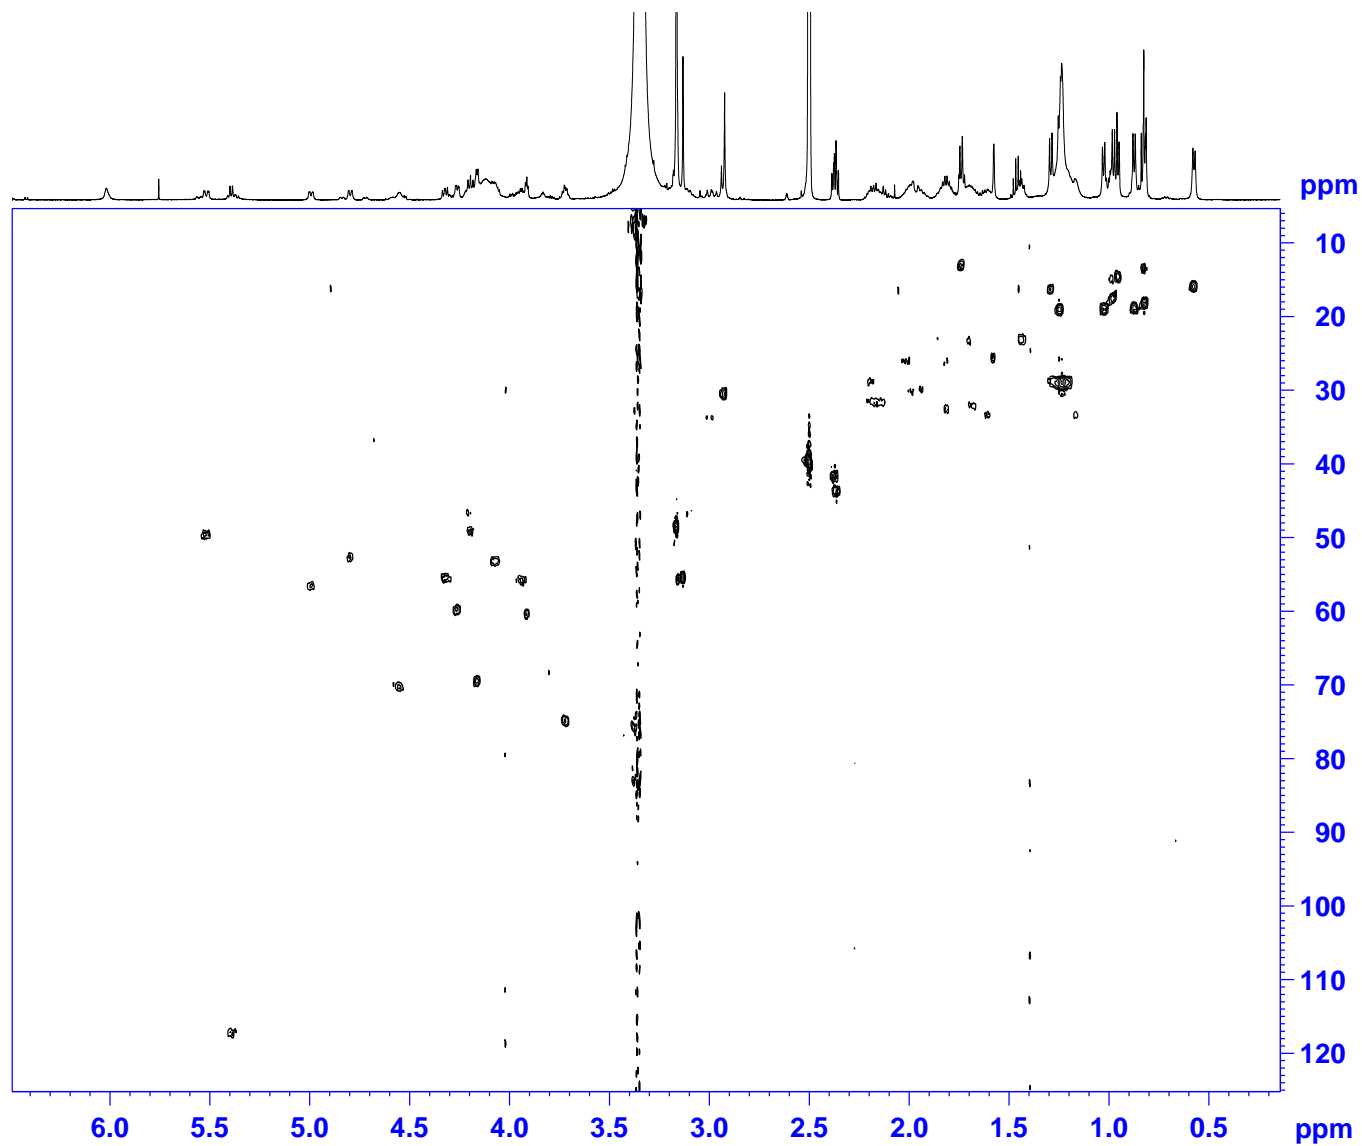

S27. HMBC spectrum (600 MHz, DMSO-*d*<sub>6</sub>) of **4**

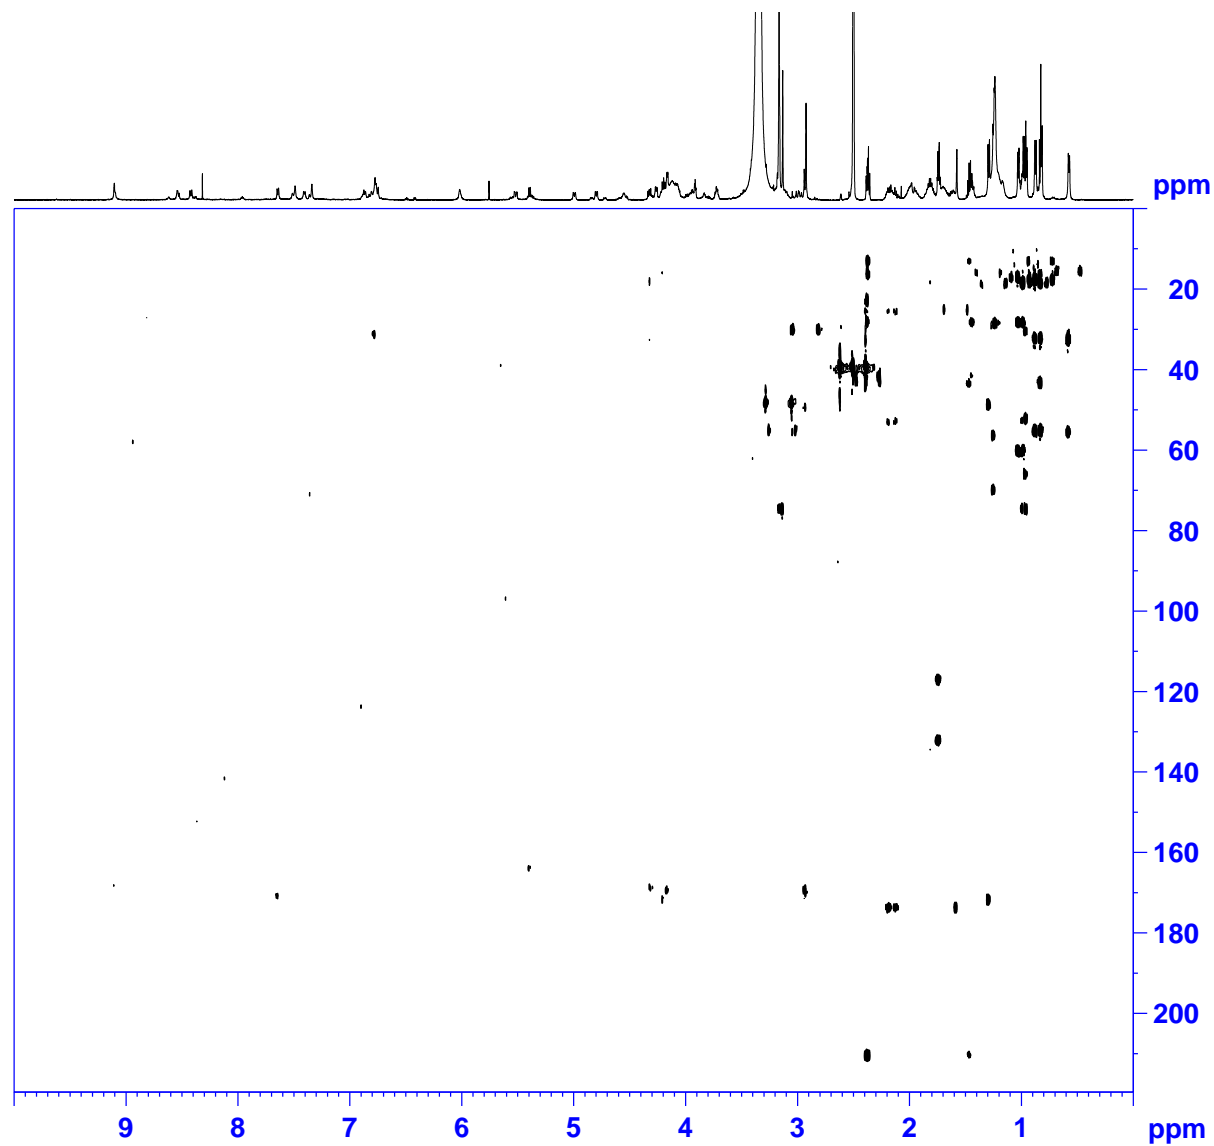

S28.  $^1\text{H}$  NMR spectrum (600 MHz,  $\text{DMSO-}d_6$ ) of **5**

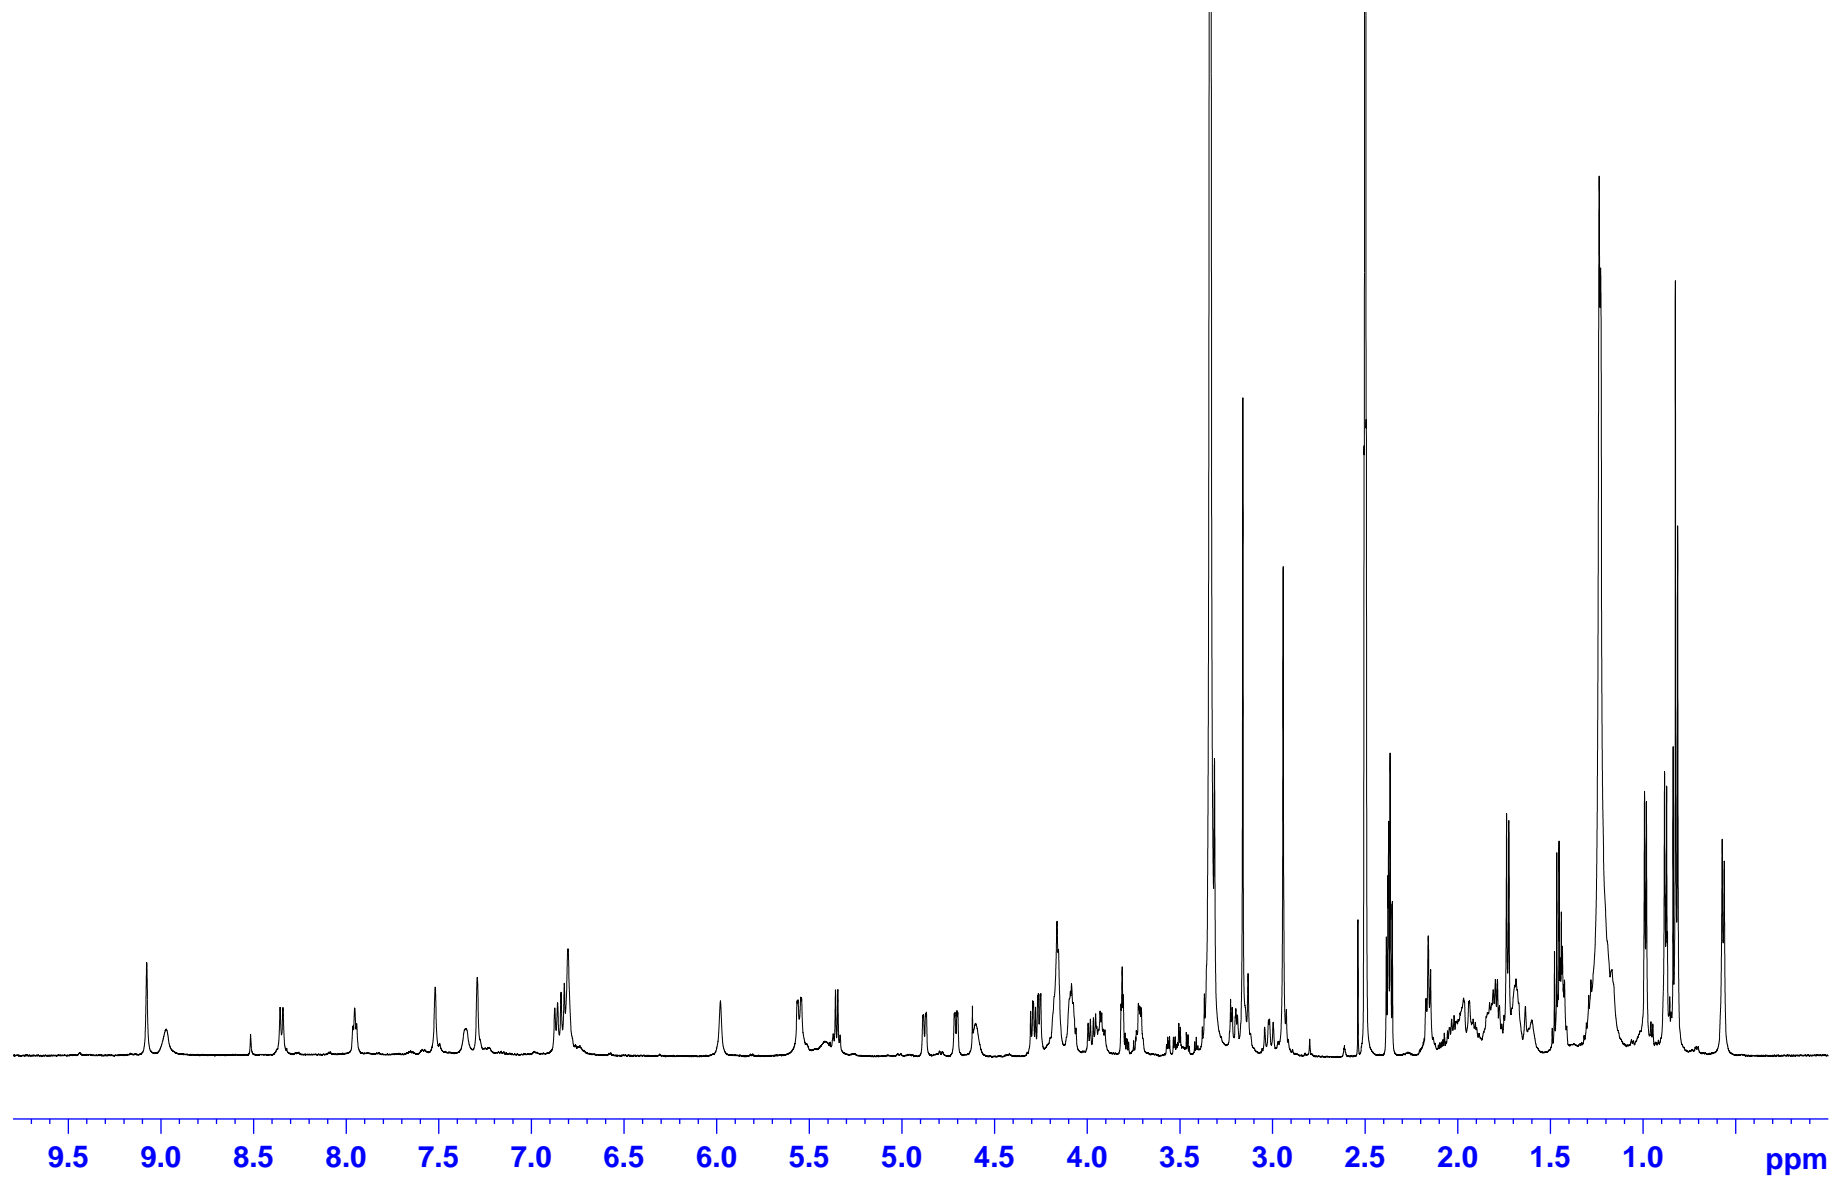



S29. DEPTQ spectrum (226 MHz, DMSO- $d_6$ ) of **5**

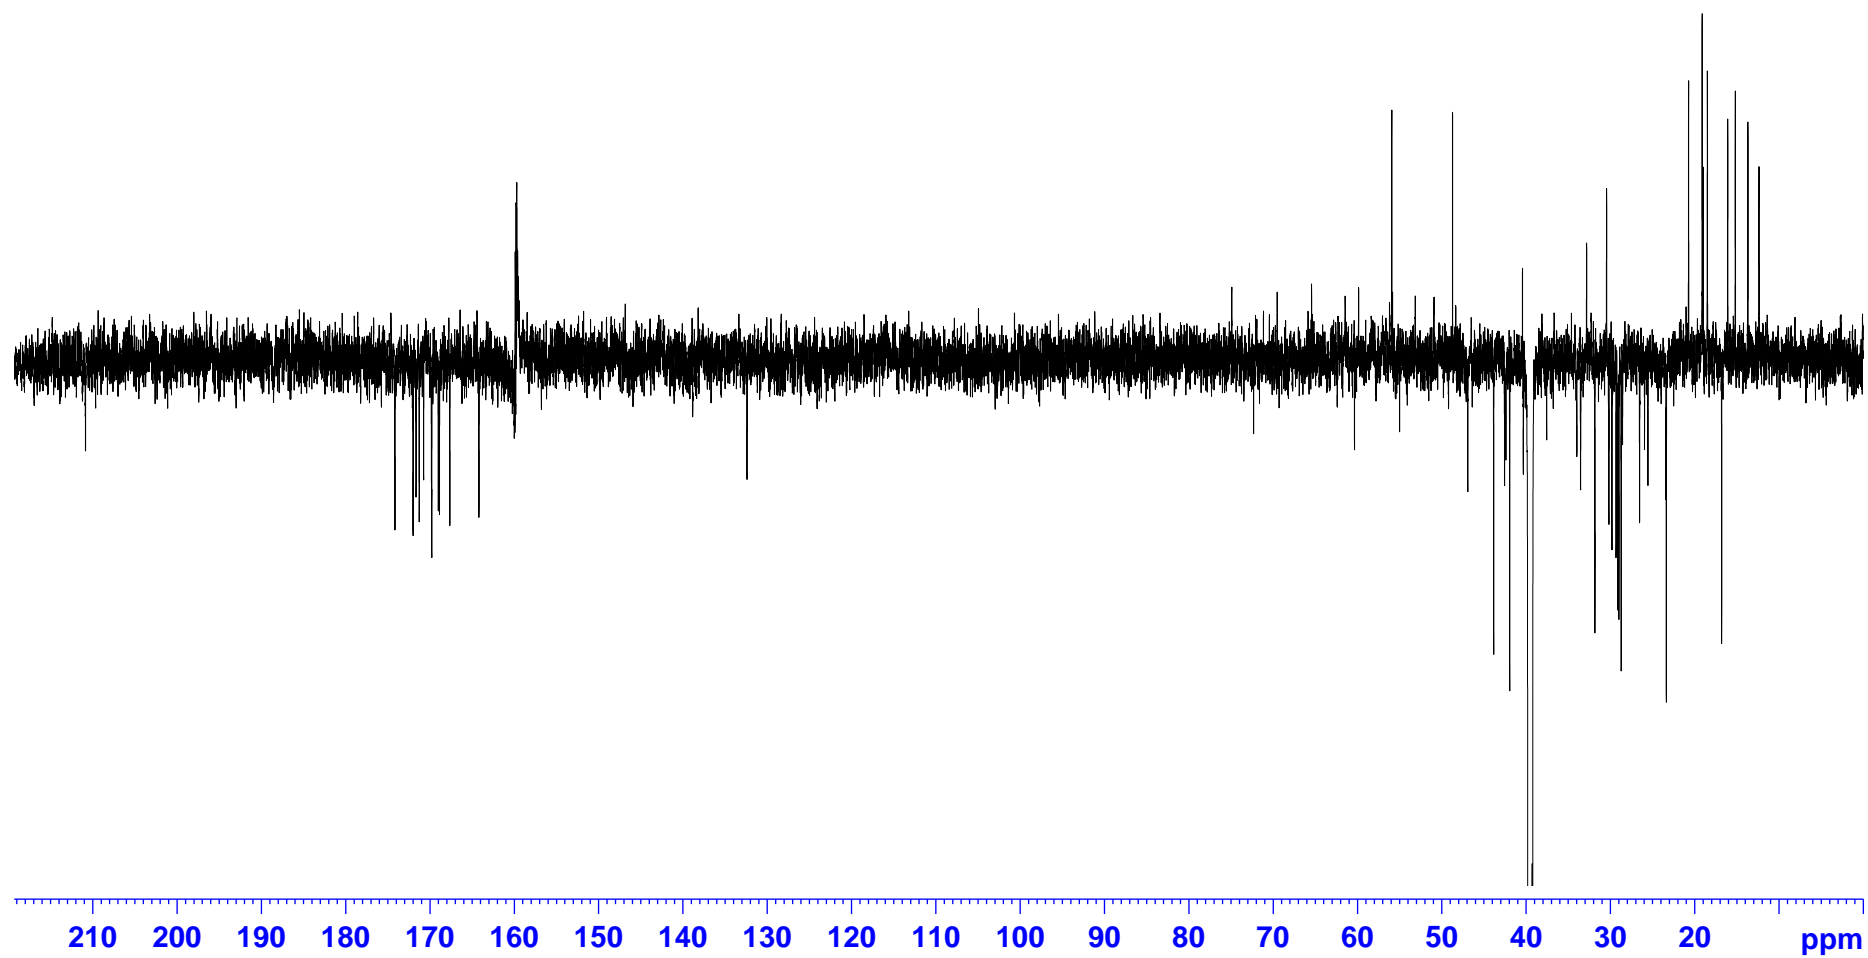

S30. COSY spectrum (600 MHz, DMSO- $d_6$ ) of **5**

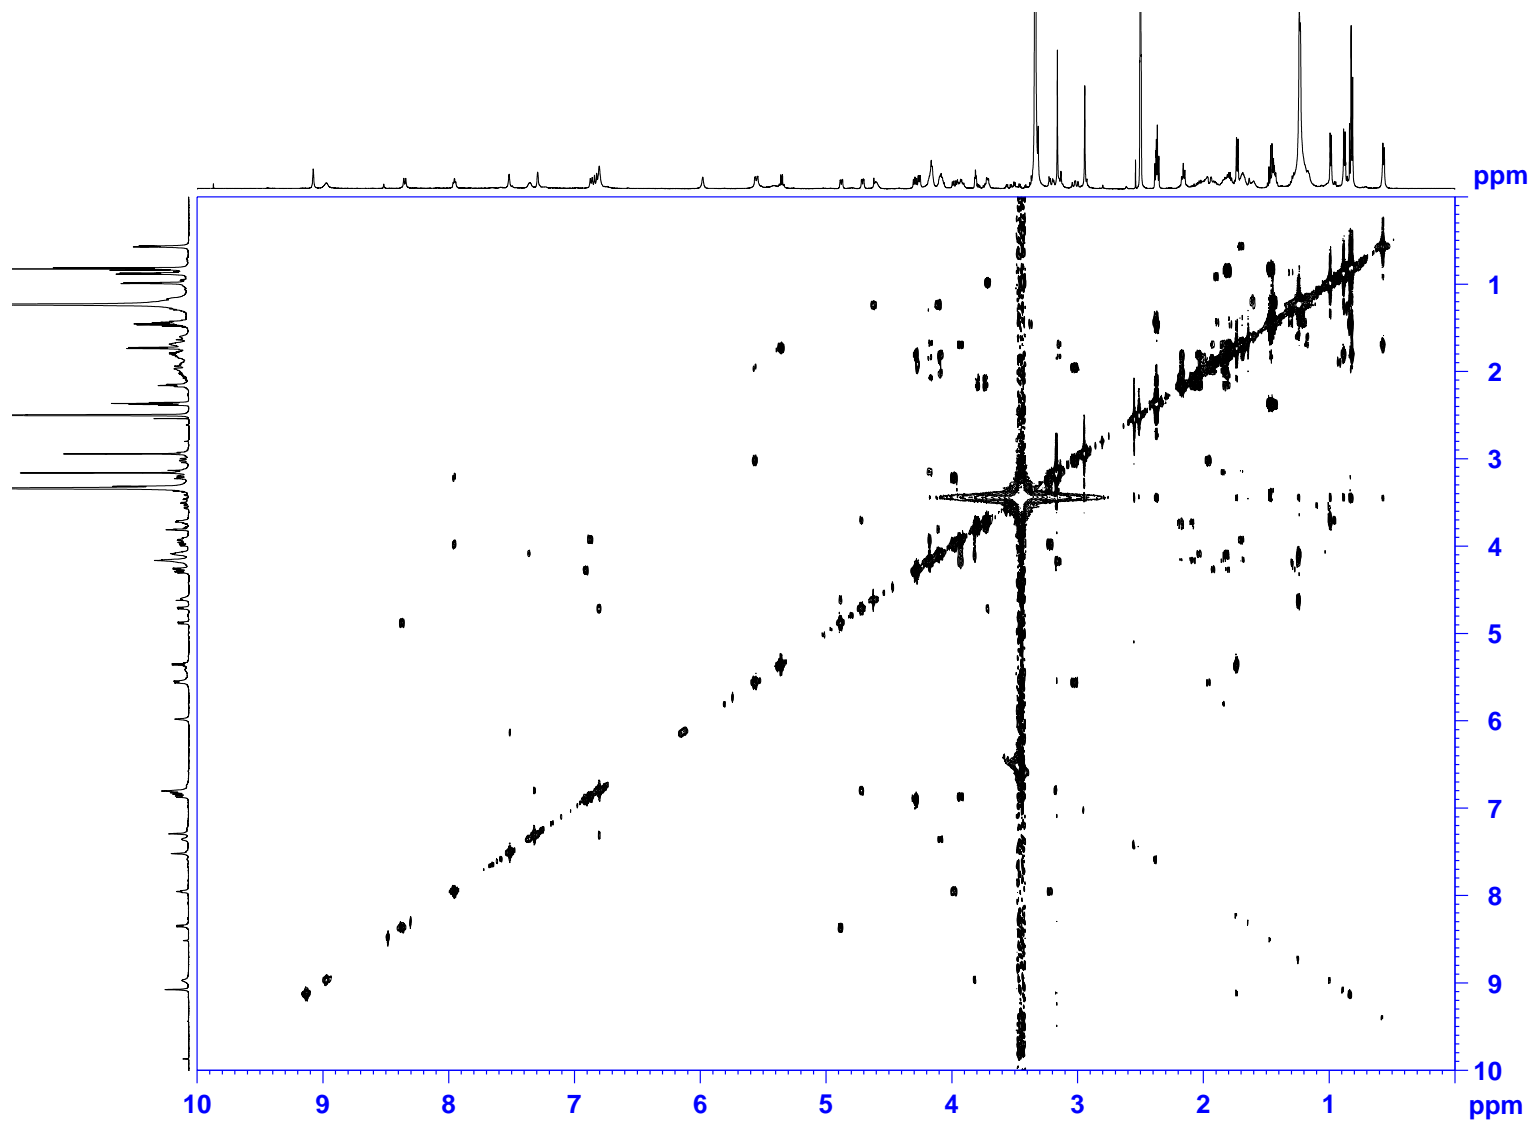

S31. TOCSY spectrum (600 MHz, DMSO- $d_6$ ) of **5**

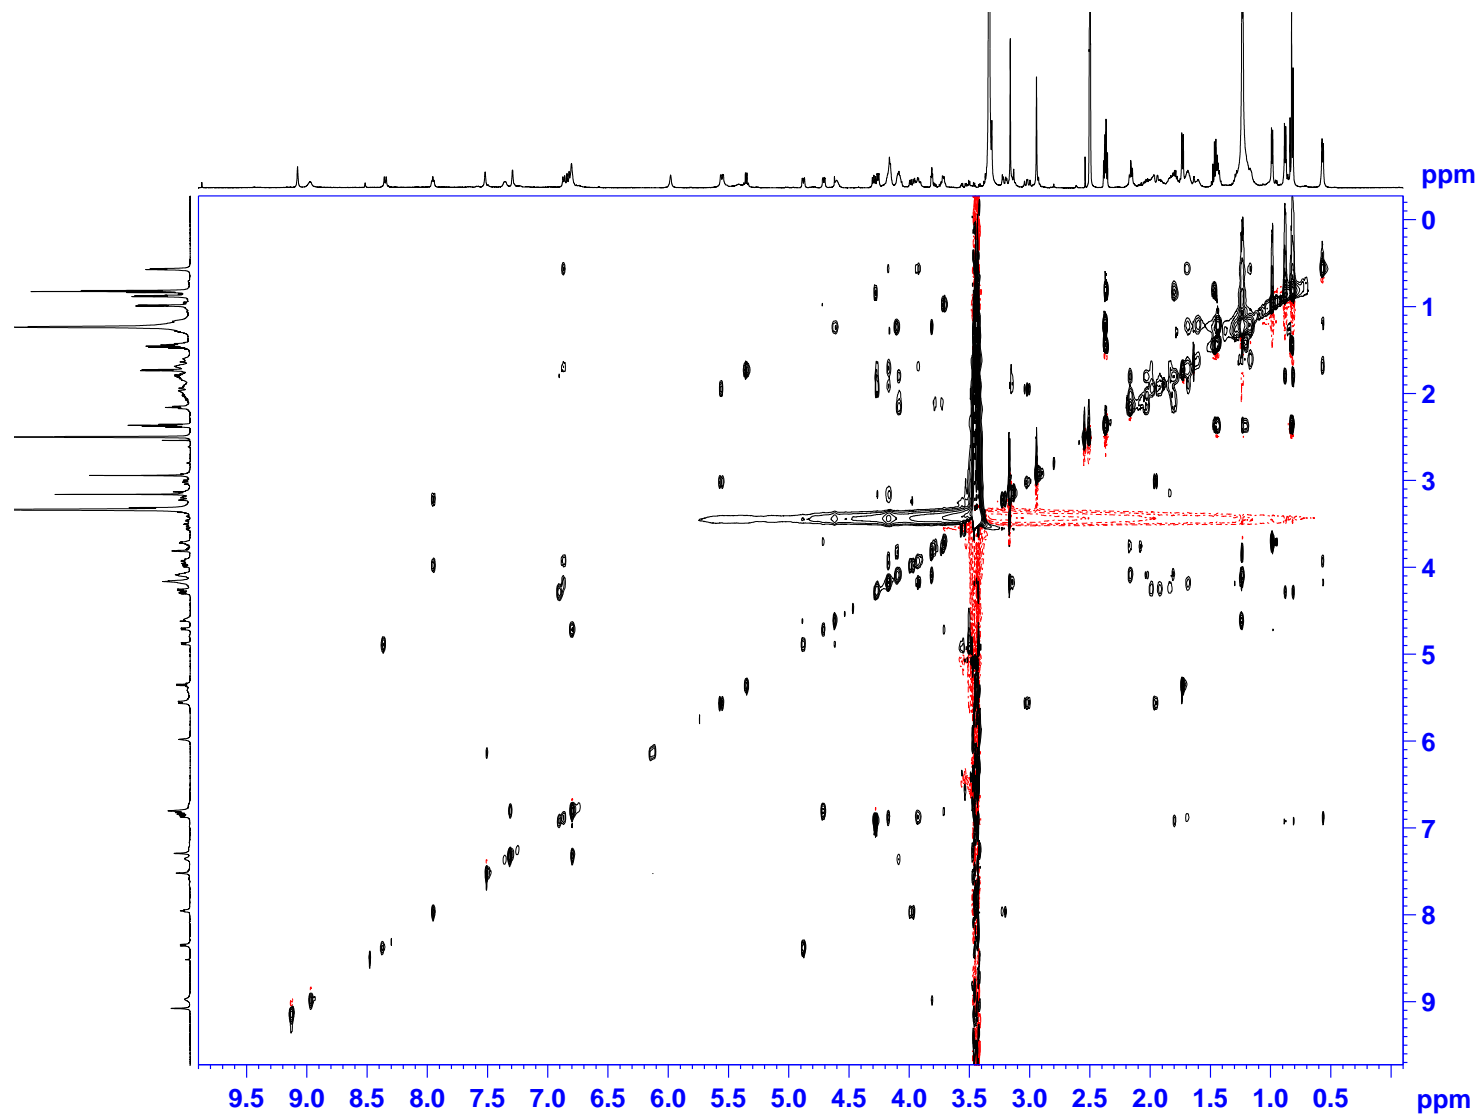

S32. HSQC spectrum (600 MHz, DMSO- $d_6$ ) of **5**

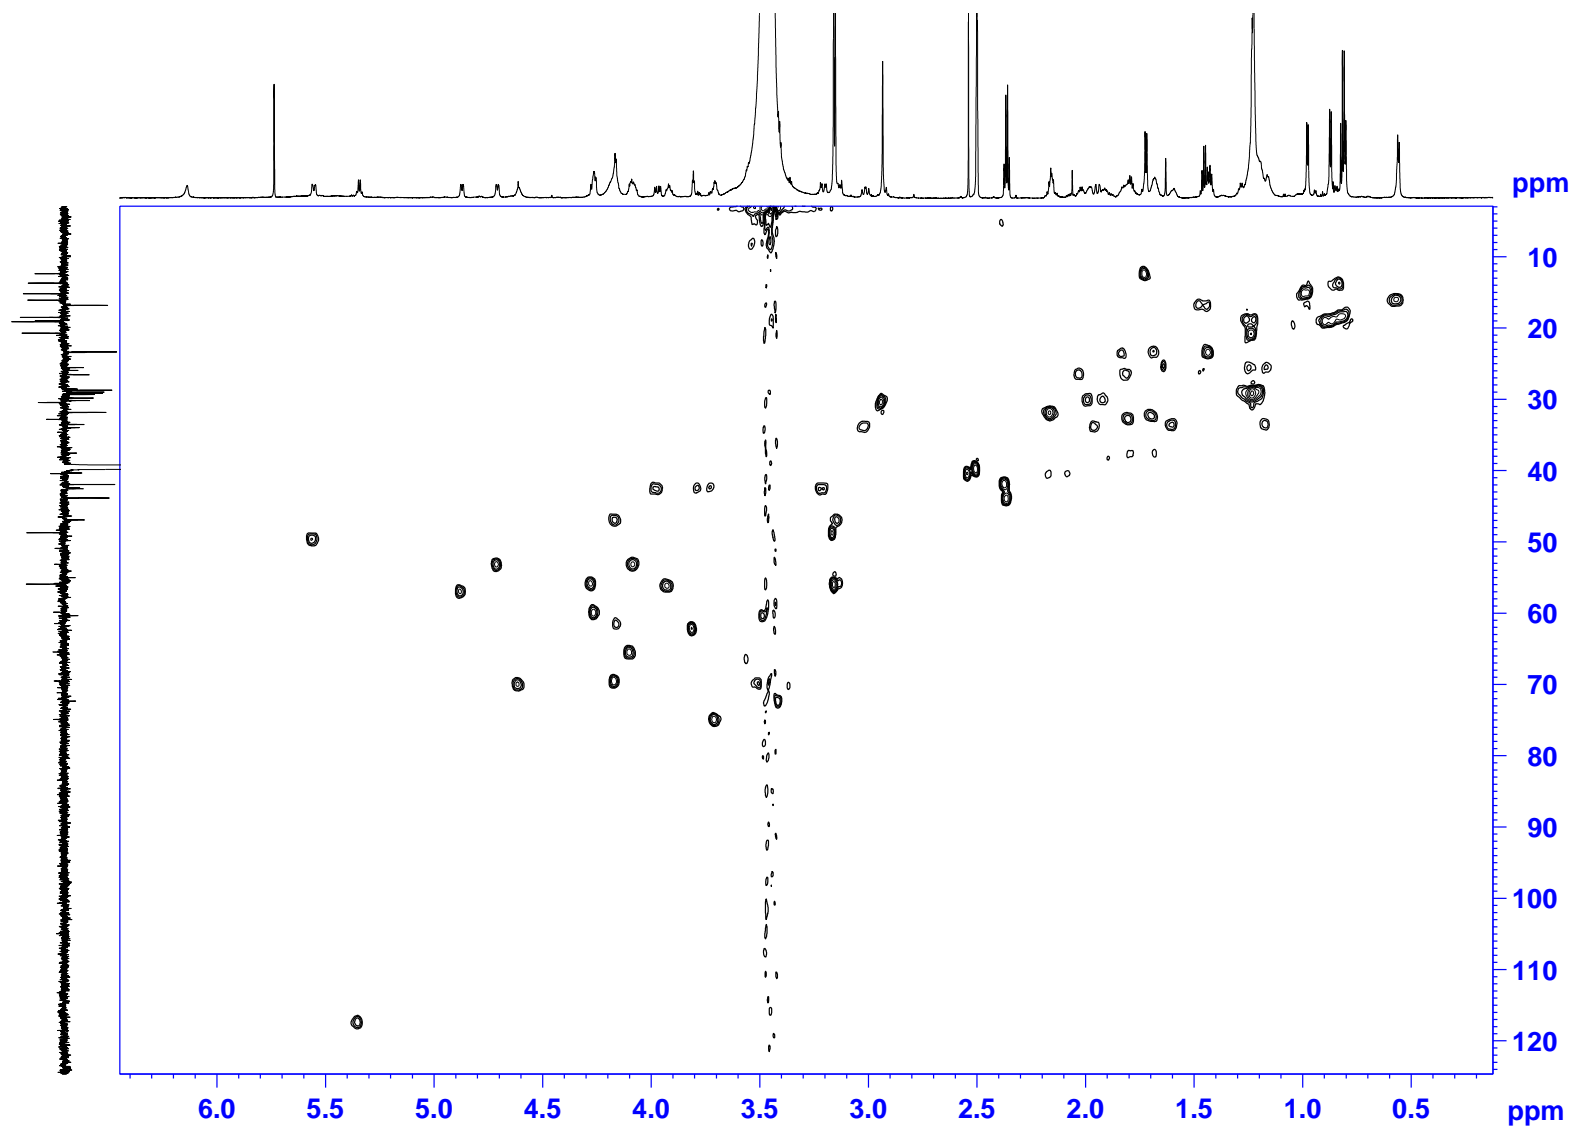

S33. HMBC spectrum (600 MHz, DMSO- $d_6$ ) of **5**

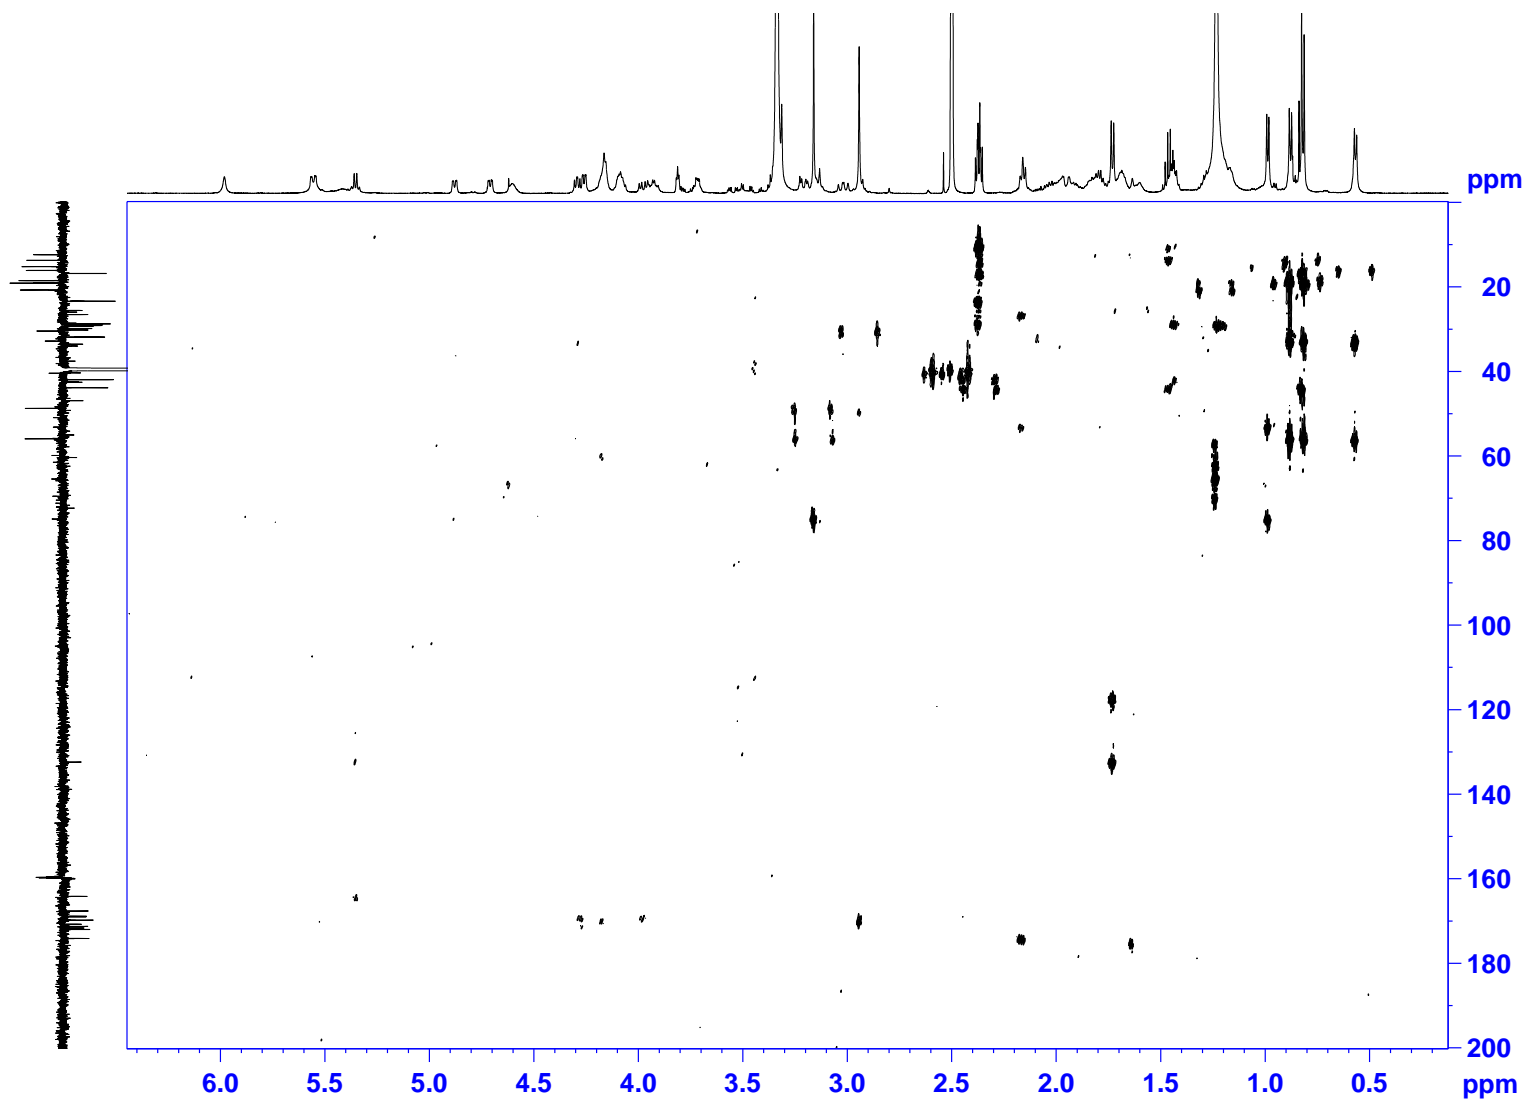

S34. Selective HMBC spectrum (900 MHz, DMSO-*d*<sub>6</sub>) of **5**

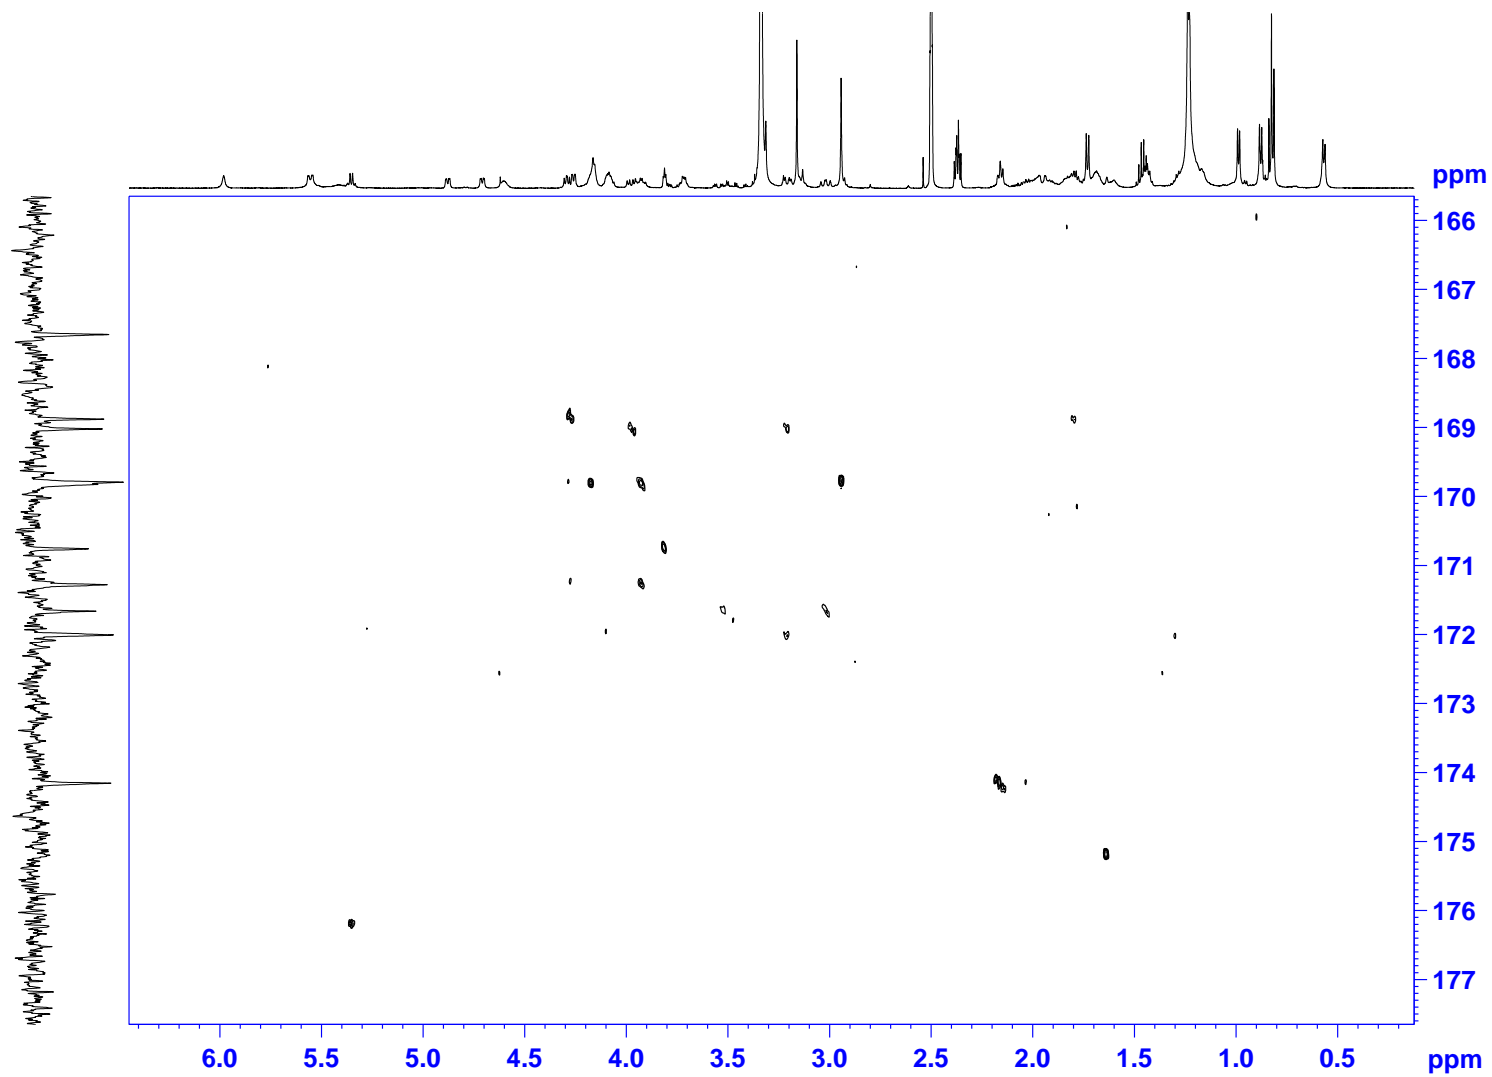

S35.  $^1\text{H}$  NMR spectrum (600 MHz,  $\text{DMSO-}d_6$ ) of **6**

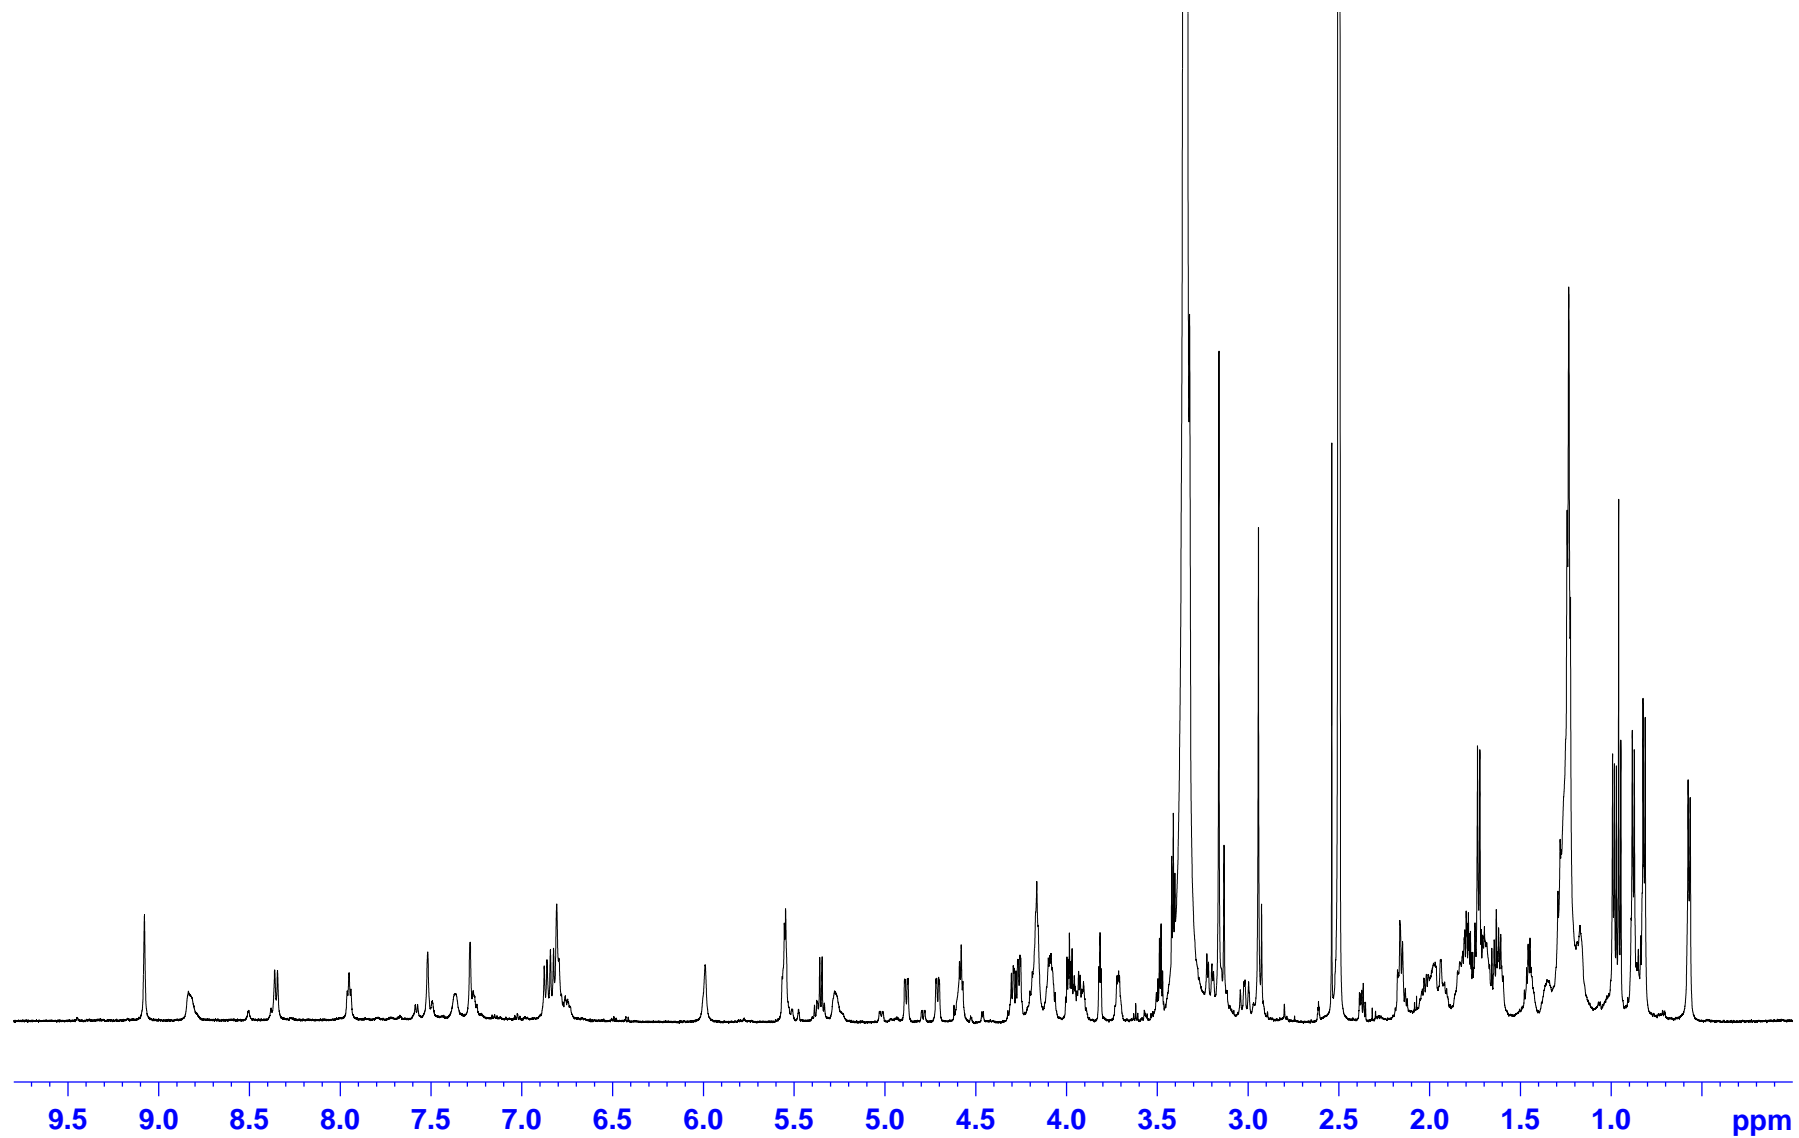

S36. COSY spectrum (600 MHz, DMSO- $d_6$ ) of **6**

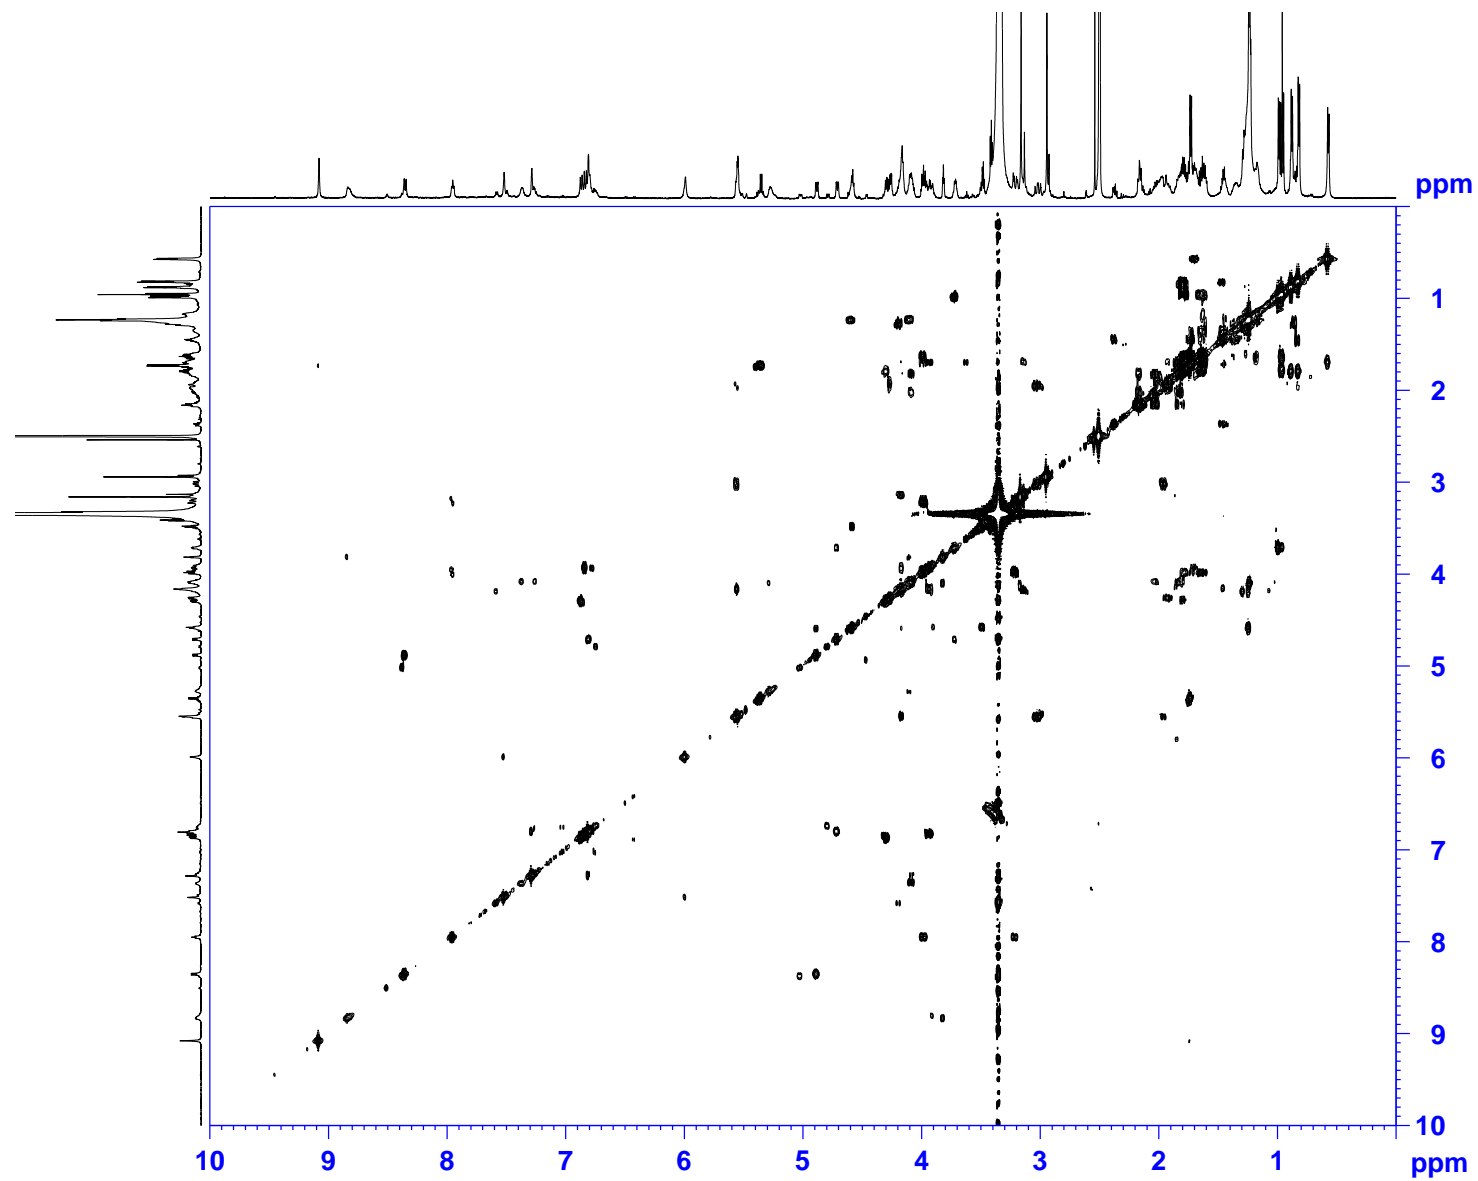



S37. TOCSY spectrum (600 MHz, DMSO- $d_6$ ) of **6**

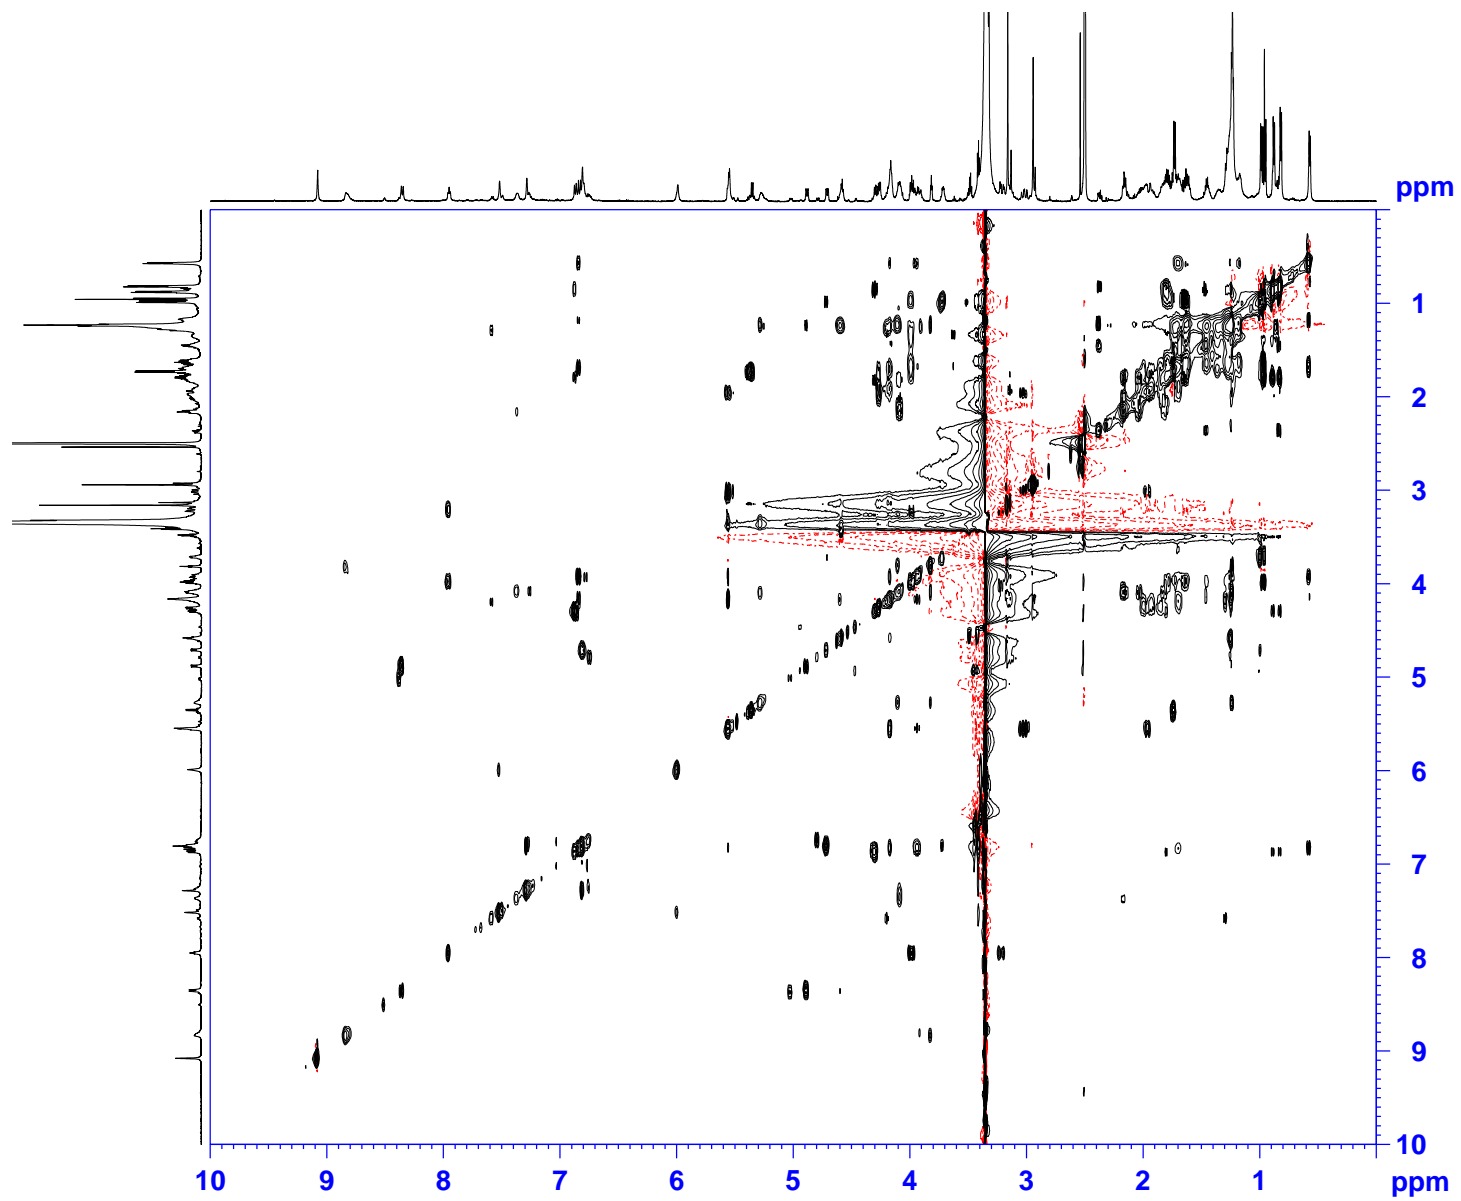

S38. HSQC spectrum (600 MHz, DMSO- $d_6$ ) of **6**

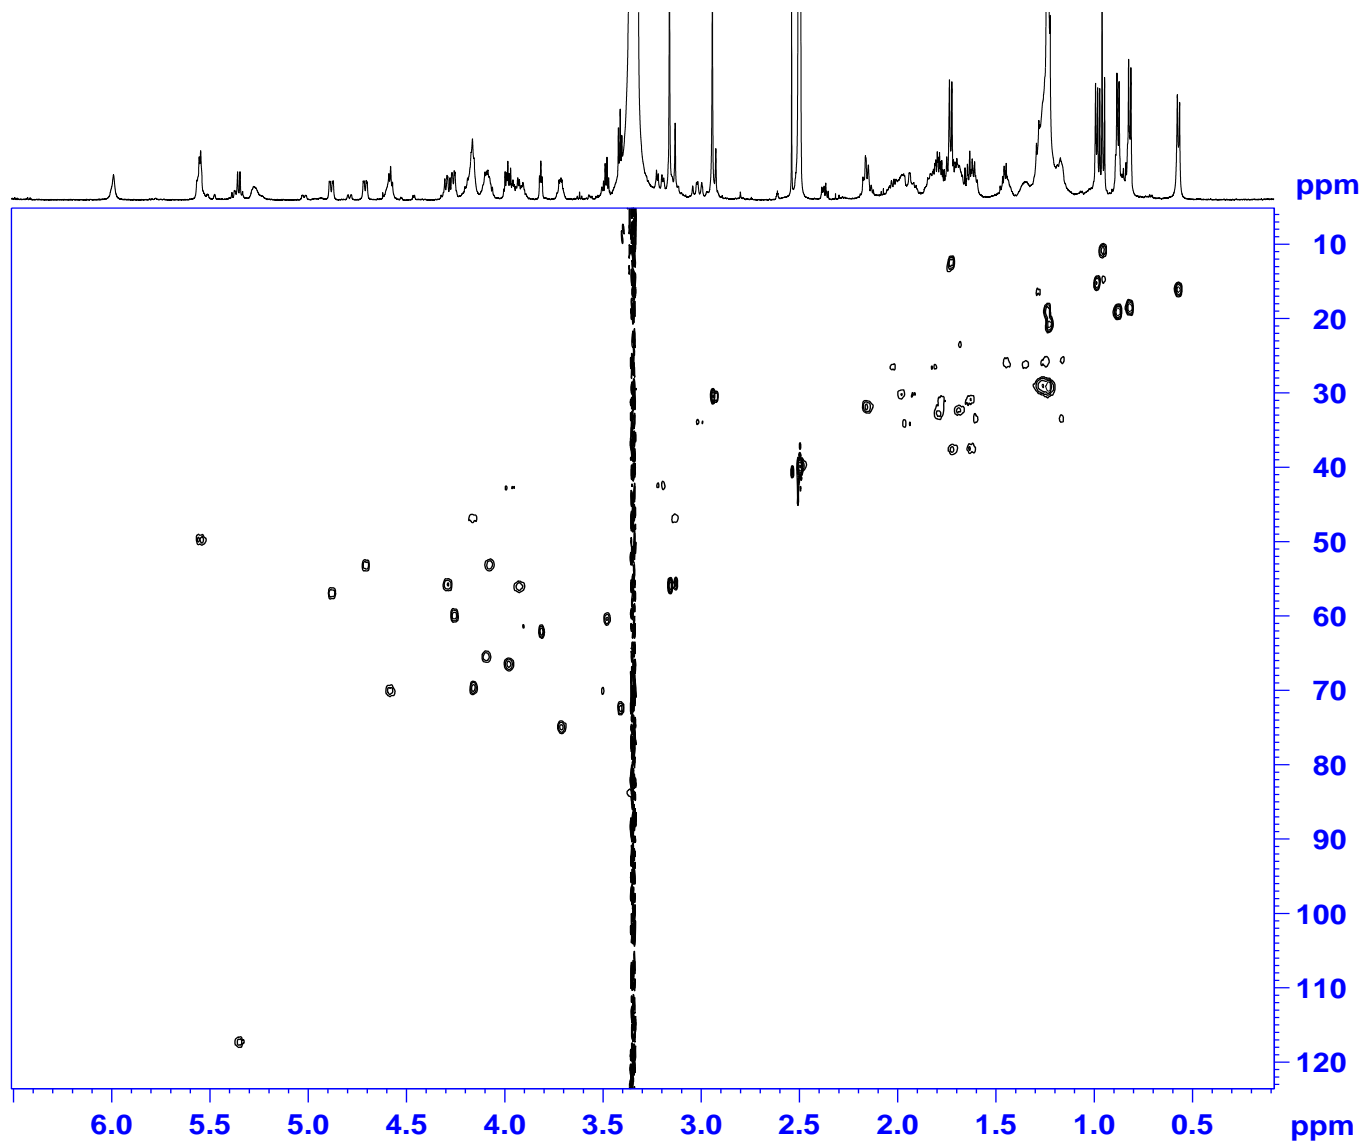

S39. HMBC spectrum (600 MHz, DMSO-*d*<sub>6</sub>) of **6**

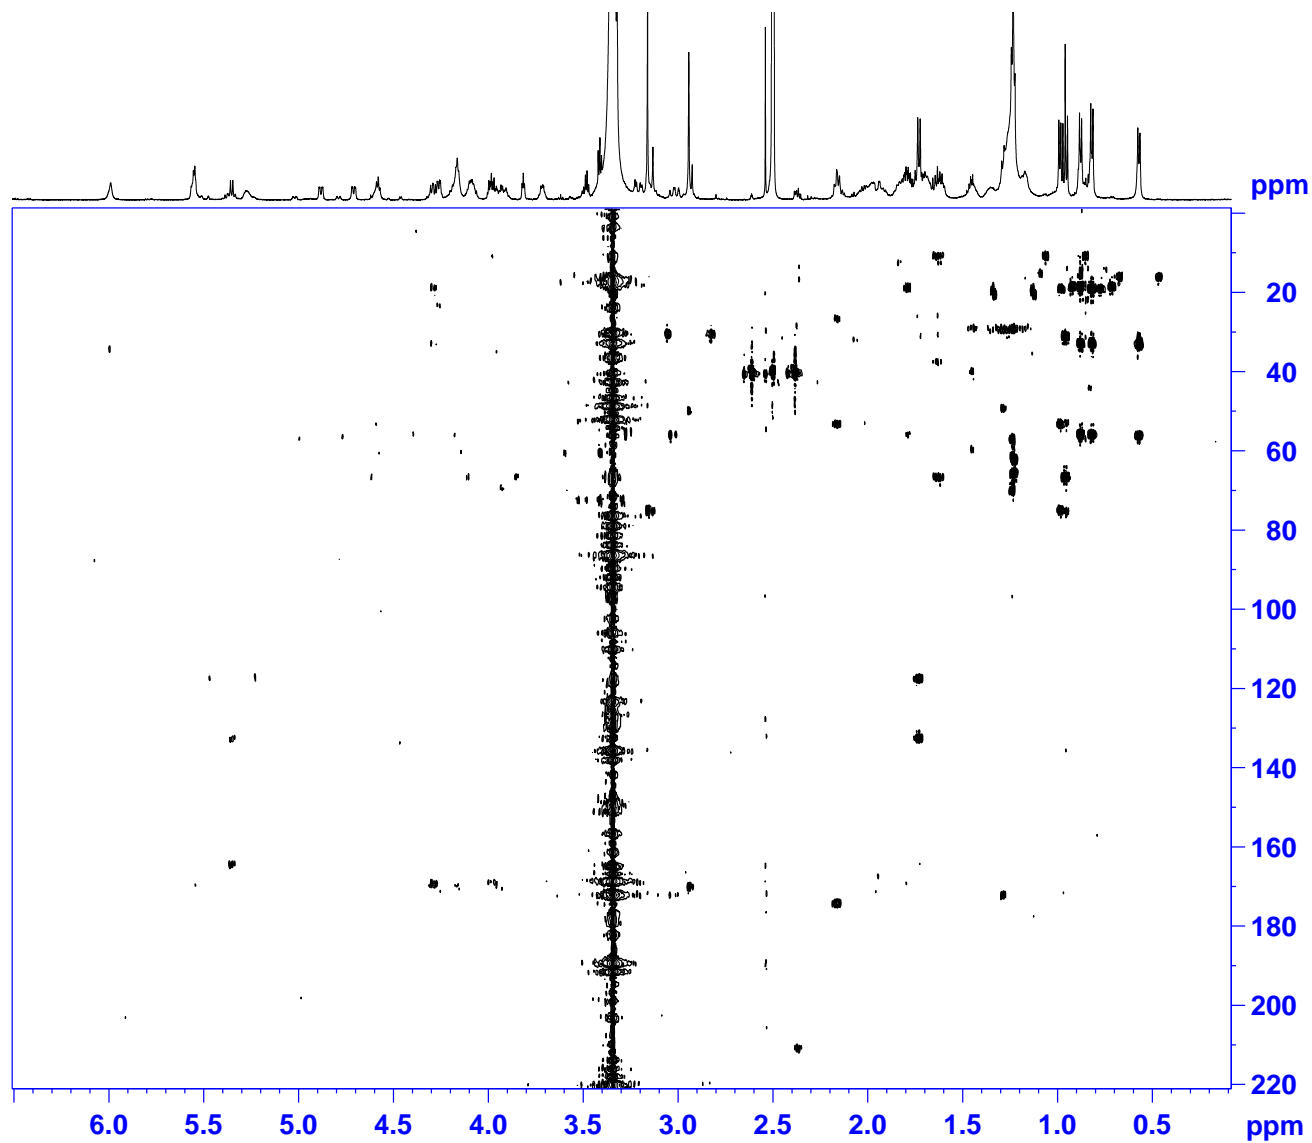

S40.  $^1\text{H}$  NMR spectrum (600 MHz,  $\text{DMSO-}d_6$ ) of inseparable mixture of **7** and **8**

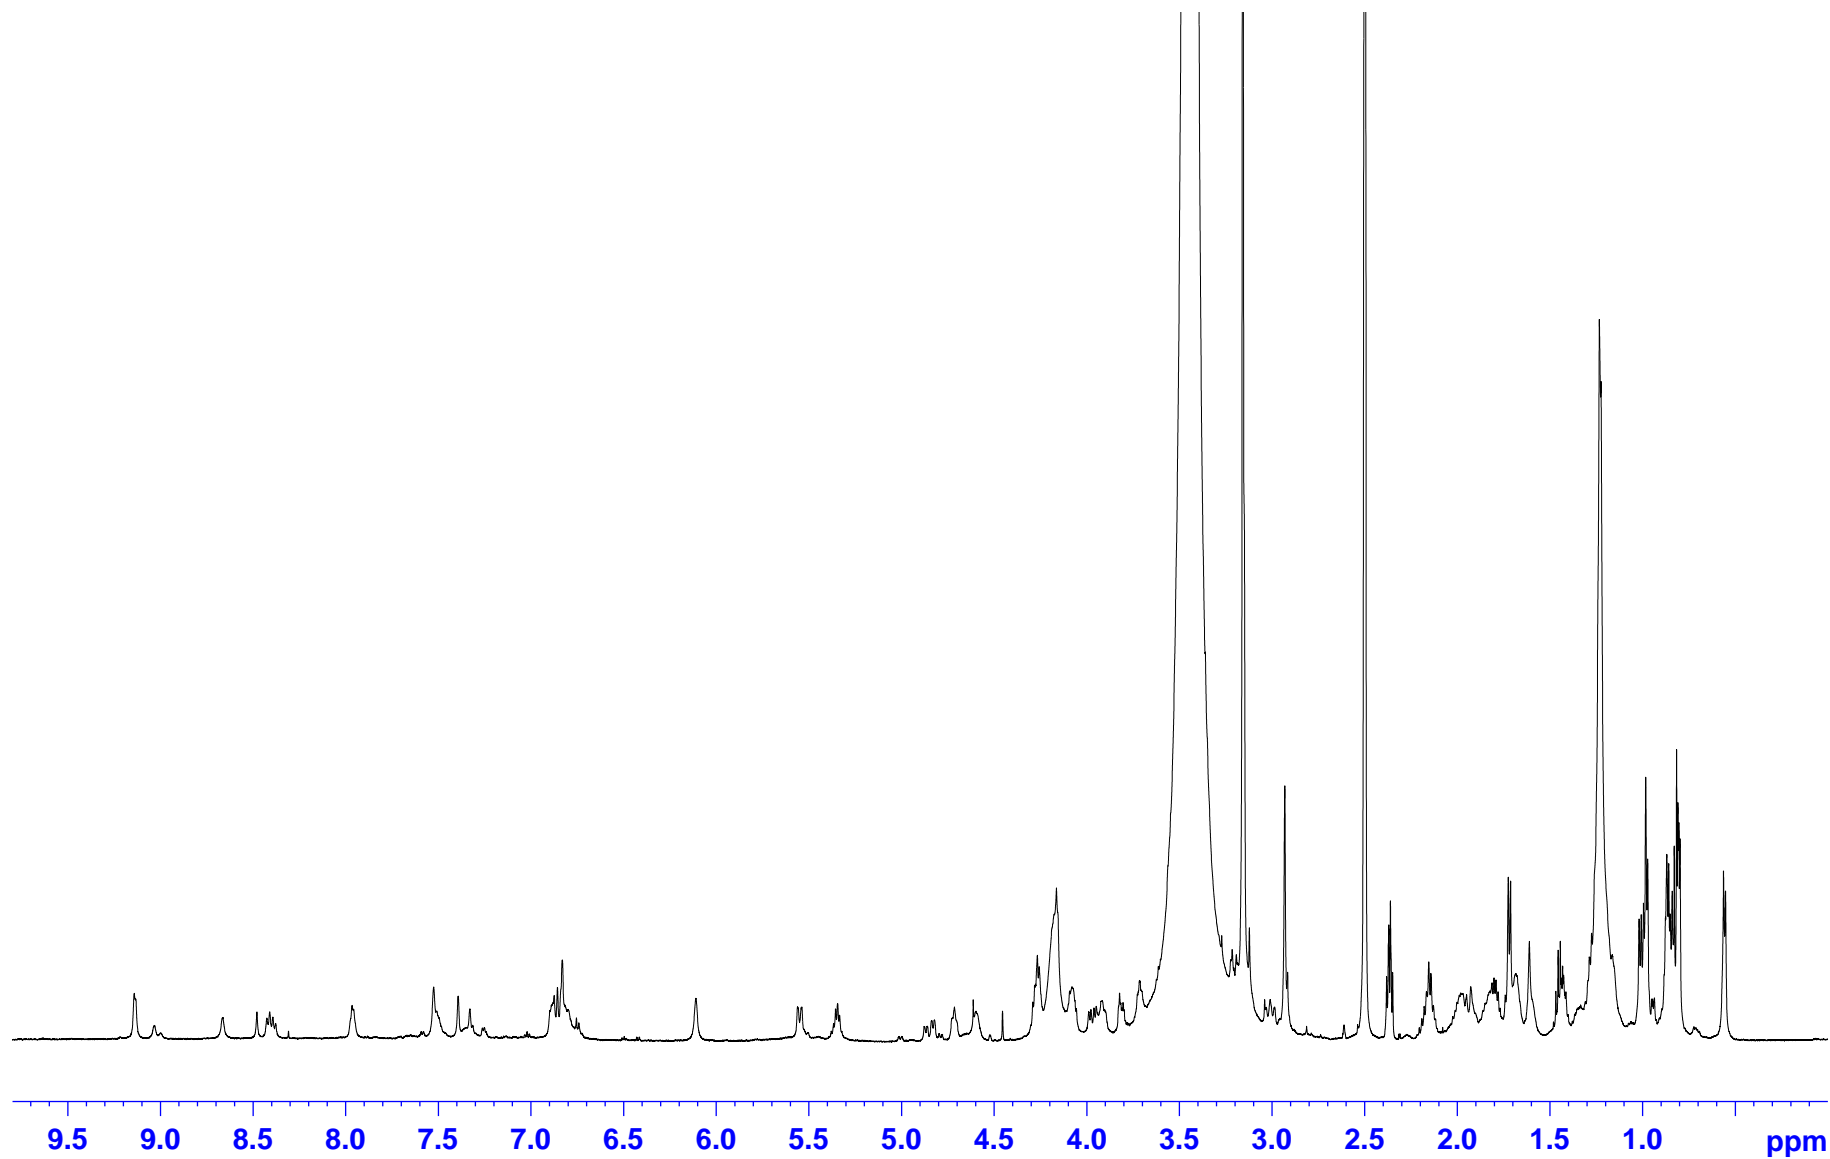

S41. COSY spectrum (600 MHz, DMSO- $d_6$ ) of inseparable mixture of **7** and **8**

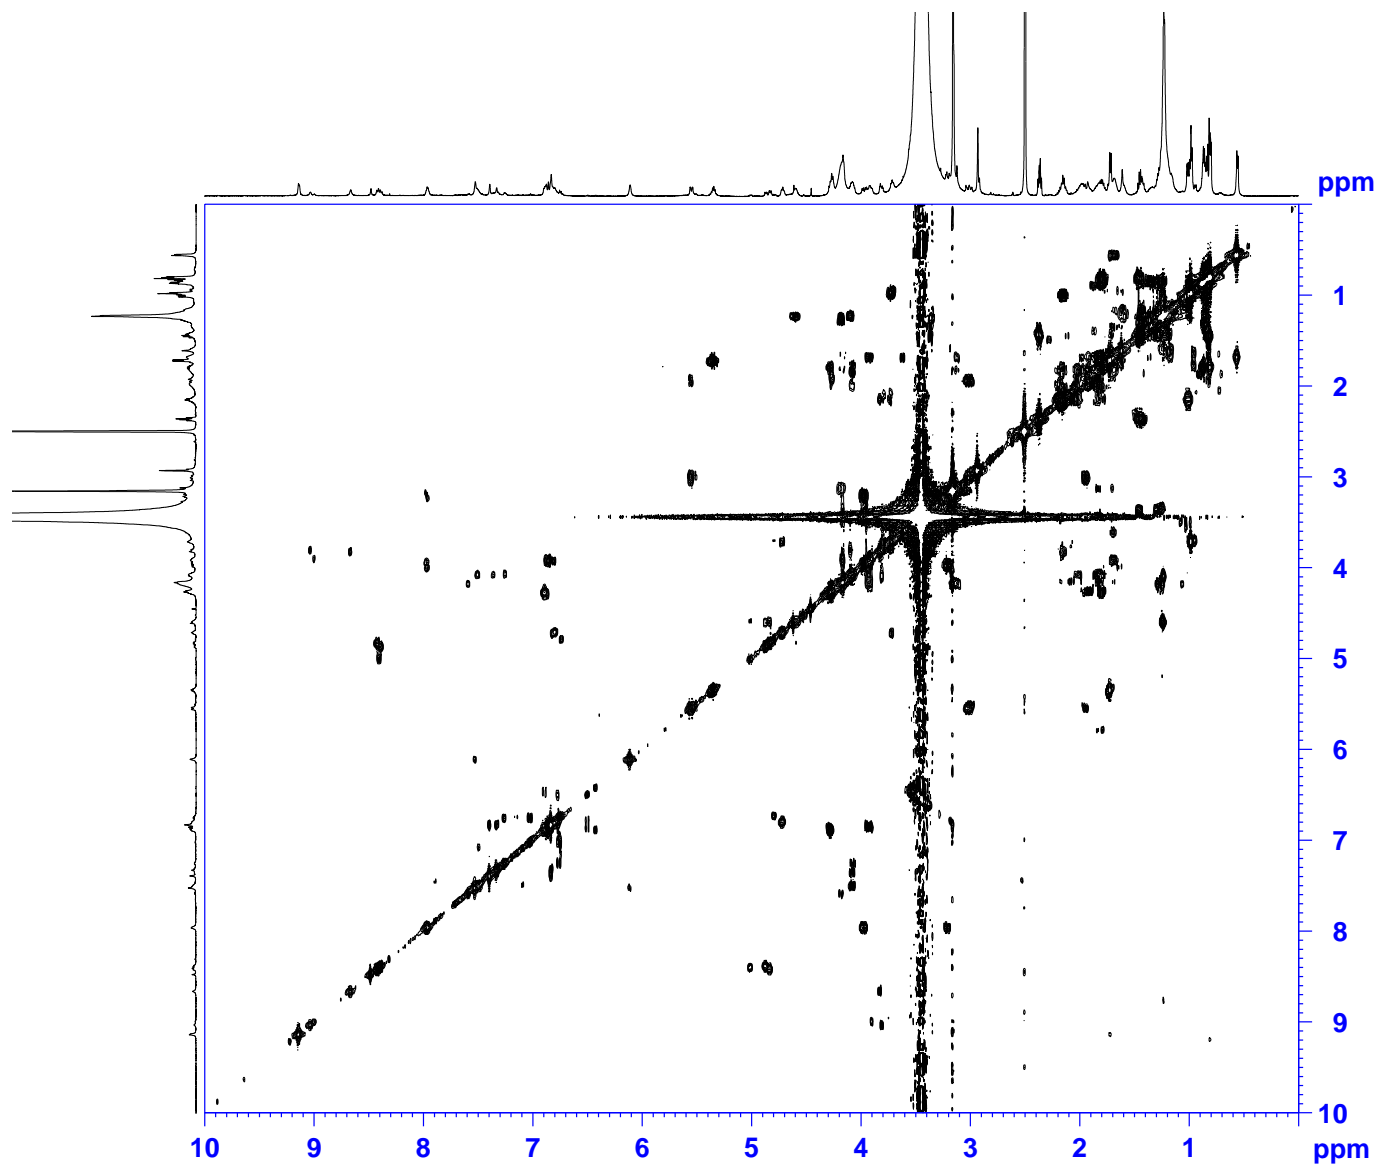

S42. TOCSY spectrum (600 MHz, DMSO- $d_6$ ) of inseparable mixture of **7** and **8**

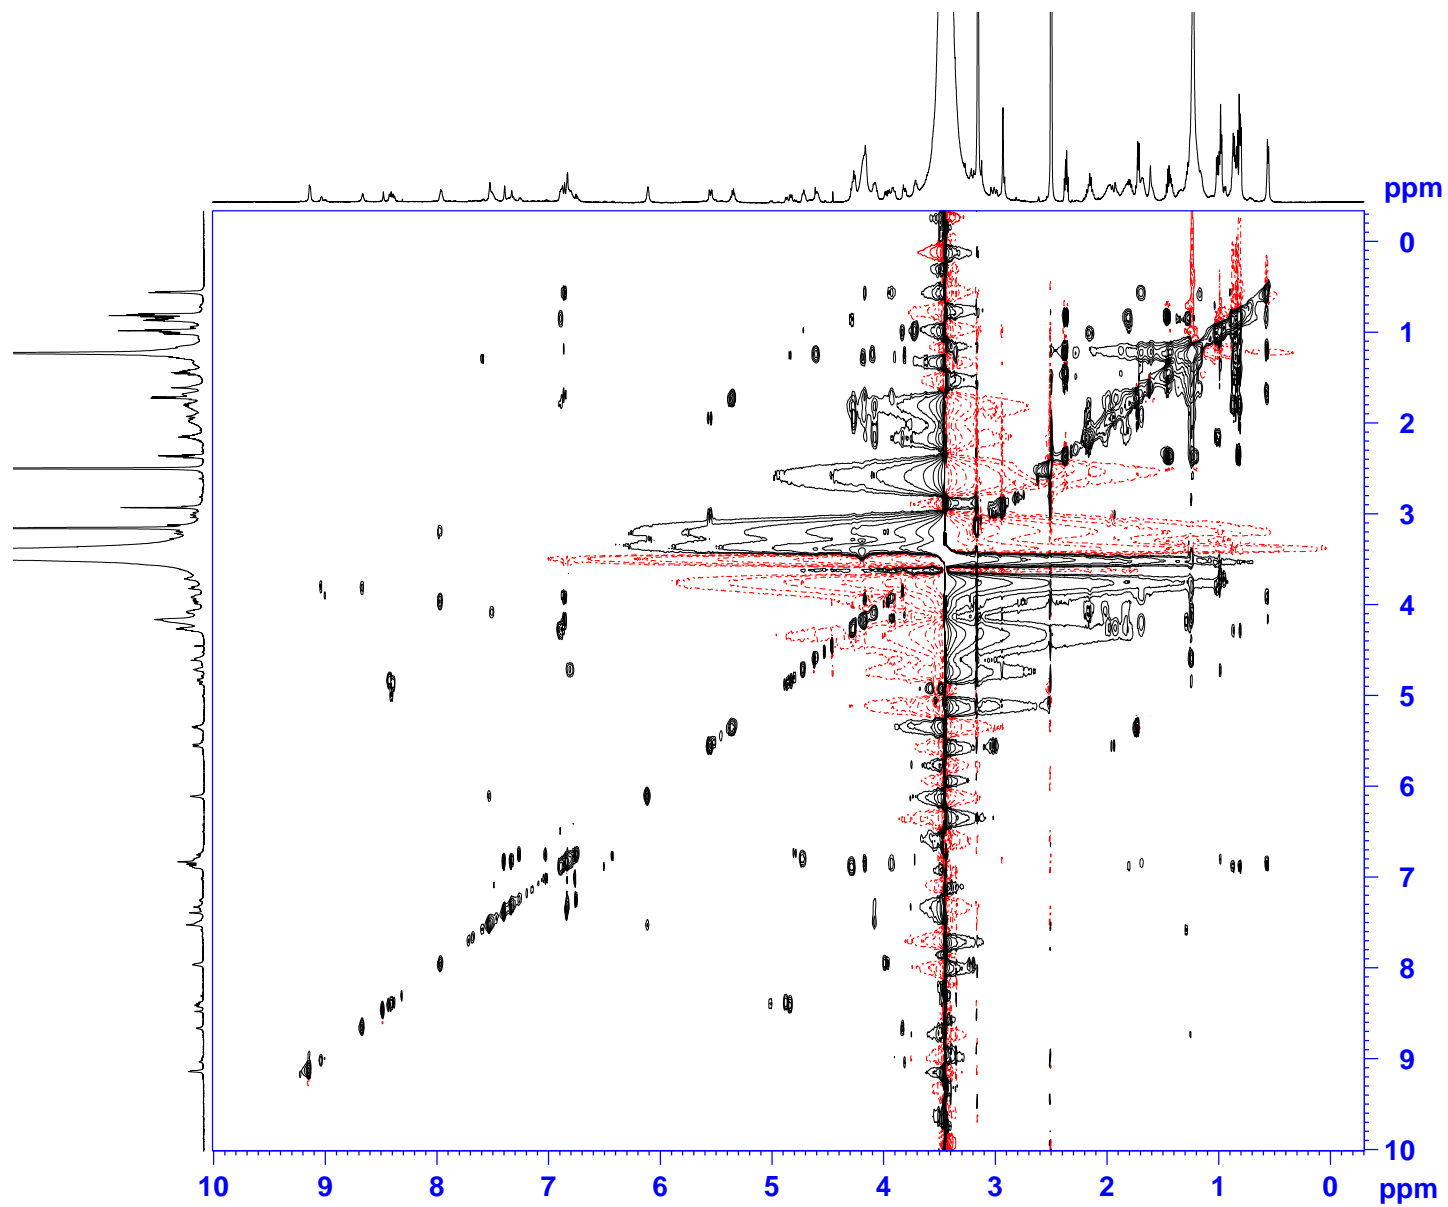

S43. HSQC spectrum (600 MHz, DMSO- $d_6$ ) of inseparable mixture of **7** and **8**

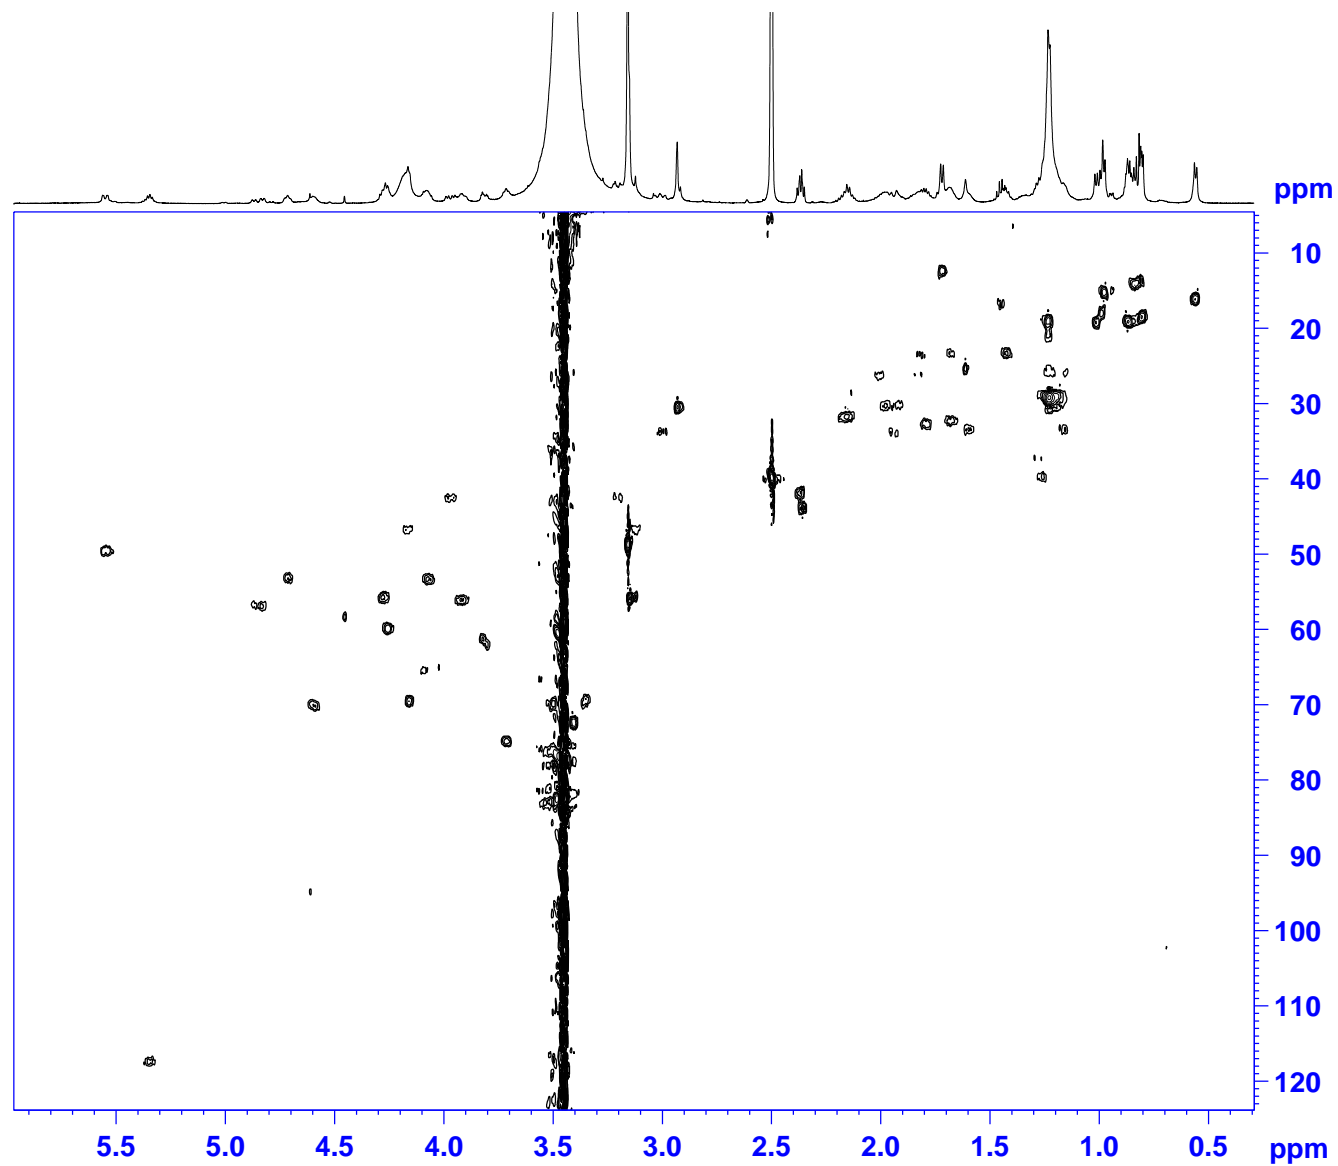

S44. HMBC spectrum (600 MHz, DMSO-*d*<sub>6</sub>) of inseparable mixture of **7** and **8**

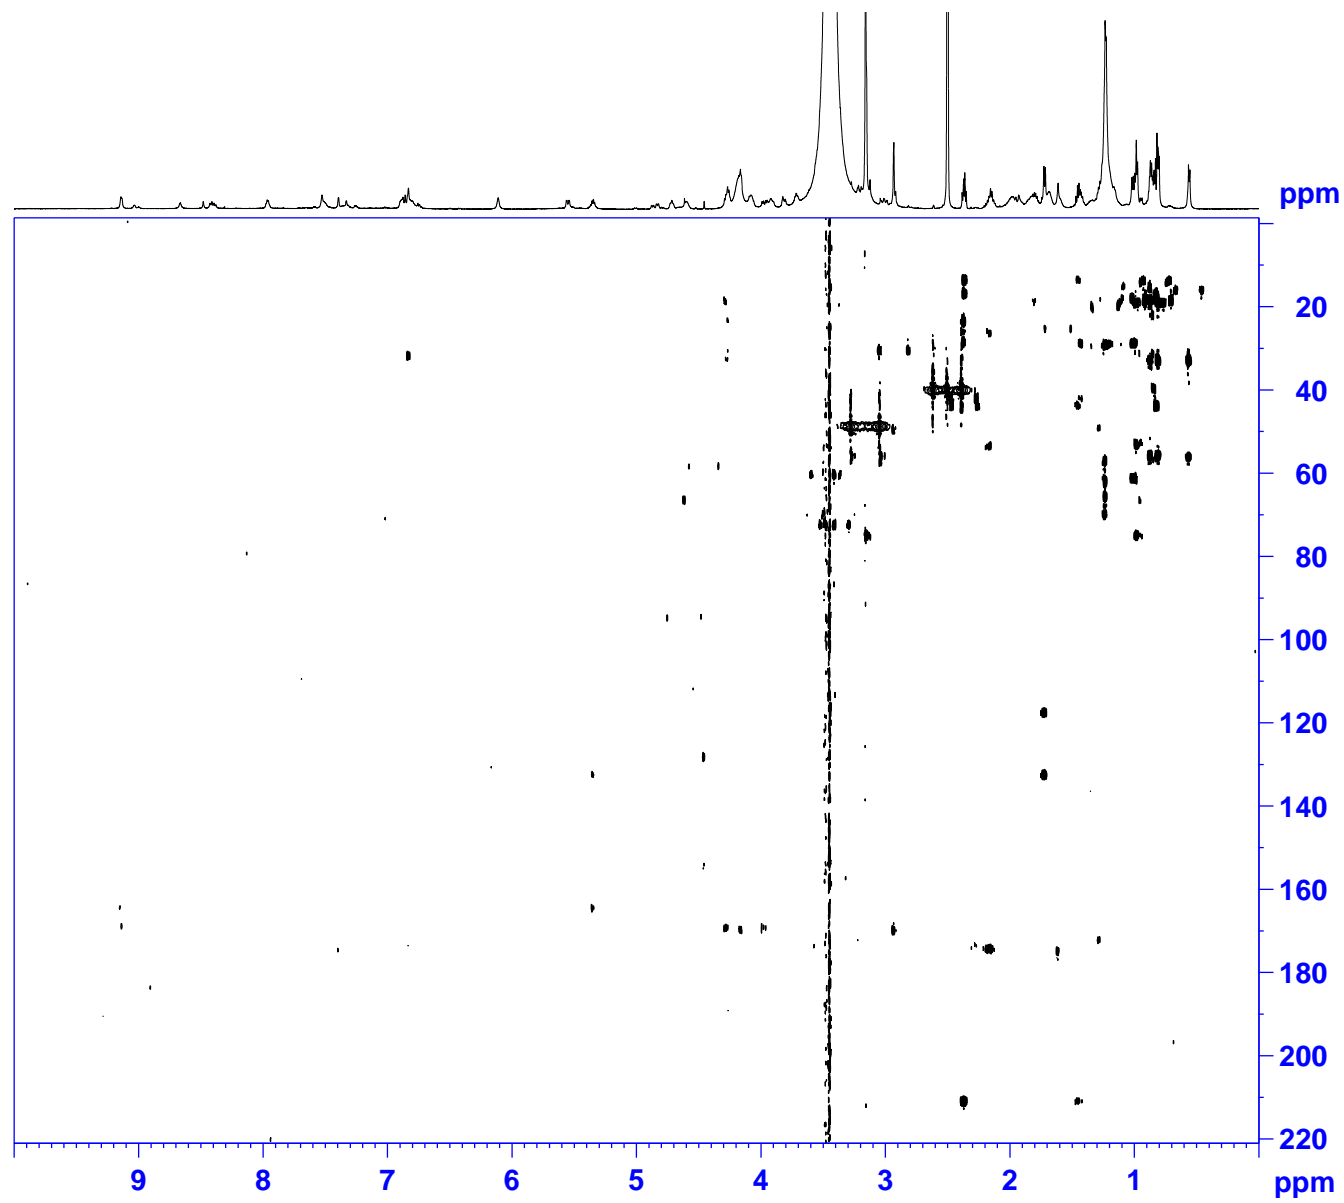

Supplement: NIHMS402594-supplement-01.pdf [file NIHMS402594-supplement-01.pdf]
